# Supplementary material for: Association between parity and persistent weight gain at age 40–60 years: a longitudinal prospective cohort study
Source: PubMed Central journal article supplement — BMJ Open. 2019 May 5;9(5):e024279. doi: 10.1136/bmjopen-2018-024279 (PMC6501996; doi:10.1136/bmjopen-2018-024279), 2019-05-05
Supplement: bmjopen-2018-024279.draft_revisions.pdf [file bmjopen-2018-024279.draft_revisions.pdf]

# BMJ Open

BMJ Open is committed to open peer review. As part of this commitment we make the peer review history of every article we publish publicly available.

When an article is published we post the peer reviewers' comments and the authors' responses online. We also post the versions of the paper that were used during peer review. These are the versions that the peer review comments apply to.

The versions of the paper that follow are the versions that were submitted during the peer review process. They are not the versions of record or the final published versions. They should not be cited or distributed as the published version of this manuscript.

BMJ Open is an open access journal and the full, final, typeset and author-corrected version of record of the manuscript is available on our site with no access controls, subscription charges or pay-per-view fees (<http://bmjopen.bmj.com>).

If you have any questions on BMJ Open's open peer review process please email [info.bmjopen@bmj.com](mailto:info.bmjopen@bmj.com)

# BMJ Open

## Association between parity and persistent weight gain at age 40-60 years: a longitudinal prospective cohort study

|                               |                                                                                                                                                                                                                                                                                                                                                                                                                                                                                                                                                                                                                                                                                             |
|-------------------------------|---------------------------------------------------------------------------------------------------------------------------------------------------------------------------------------------------------------------------------------------------------------------------------------------------------------------------------------------------------------------------------------------------------------------------------------------------------------------------------------------------------------------------------------------------------------------------------------------------------------------------------------------------------------------------------------------|
| Journal:                      | <i>BMJ Open</i>                                                                                                                                                                                                                                                                                                                                                                                                                                                                                                                                                                                                                                                                             |
| Manuscript ID                 | bmjopen-2018-024279                                                                                                                                                                                                                                                                                                                                                                                                                                                                                                                                                                                                                                                                         |
| Article Type:                 | Research                                                                                                                                                                                                                                                                                                                                                                                                                                                                                                                                                                                                                                                                                    |
| Date Submitted by the Author: | 18-May-2018                                                                                                                                                                                                                                                                                                                                                                                                                                                                                                                                                                                                                                                                                 |
| Complete List of Authors:     | Zoet, Gerbrand; Universitair Medisch Centrum Utrecht, Obstetrics & Gynaecology<br>Paauw, Nina; Universitair Medisch Centrum Utrecht, Obstetrics & Gynaecology<br>Groenhof, Katrien; Universitair Medisch Centrum Utrecht, Julius Center for Health Sciences and Primary Care<br>Franx, Arie; University Medical Center Utrecht, Obstetrics & Gynaecology<br>Gansevoort, Ron T.; University Medical Center Groningen, Division of Nephrology<br>Groen, Henk; University Medical Centre Groningen, Department of Epidemiology<br>Van Rijn, Bas; Universitair Medisch Centrum Utrecht, Obstetrics & Gynaecology<br>Lely, Titia; Universitair Medisch Centrum Utrecht, Obstetrics & Gynaecology |
| Keywords:                     | Pregnancy, Parity, Cardiovascular risk factors, BMI, HDL cholesterol, Hypertension < CARDIOLOGY                                                                                                                                                                                                                                                                                                                                                                                                                                                                                                                                                                                             |
|                               |                                                                                                                                                                                                                                                                                                                                                                                                                                                                                                                                                                                                                                                                                             |

SCHOLARONE™  
Manuscripts

only

1  
2  
3 1 **Association between parity and persistent weight gain at age 40-60 years: a longitudinal**  
4  
5  
6 2 **prospective cohort study**

7  
8 3 **Gerbrand A. Zoet, MD<sup>a</sup>; Nina D. Paauw, MD<sup>a</sup>; T. Katrien J. Groenhof, MD<sup>b</sup>, Arie Franx, MD PhD<sup>a</sup>; Ron T.**  
9  
10 4 **Gansevoort, MD, PhD<sup>c</sup>; Henk Groen<sup>d</sup>, MD, PhD; Bas B. van Rijn, MD, PhD<sup>a,e</sup>, A.Titia Lely, MD, PhD<sup>a</sup>.**

11  
12  
13  
14  
15 6 <sup>a</sup> Wilhelmina Children's Hospital Birth Center, University Medical Center Utrecht, Lundlaan 6, 3508 AB, Utrecht, the Netherlands

16  
17 7 <sup>b</sup> Julius Center for Health Sciences and Primary Care, University Medical Center Utrecht, Heidelberglaan 100, 3584 CX, Utrecht,  
18  
19 8 the Netherlands

20  
21 9 <sup>c</sup> Division of Nephrology, Department of Internal Medicine, University Medical Center Groningen, University of Groningen,  
22  
23 10 Hanzeplein 1, 9713 GZ, Groningen, the Netherlands

24  
25 11 <sup>d</sup> Department of Epidemiology, University Medical Center Groningen, University of Groningen, Hanzeplein 1, 9713 GZ,  
26  
27 12 Groningen, the Netherlands

28  
29 13 <sup>e</sup> Academic Unit of Human Development and Health, University of Southampton, Princess Anne Hospital, Coxford Road,  
30  
31 14 Southampton SO16 5YA, United Kingdom

32  
33 16 Corresponding author at: G.A. Zoet, University Medical Center Utrecht, Room KE 02.510.2, Lundlaan 6, PO Box 85090, 3508 AB,  
34  
35 17 Utrecht, The Netherlands. Tel.: +31 88 7557526, e-mail: [g.zoet@umcutrecht.nl](mailto:g.zoet@umcutrecht.nl)

36  
37 18  
38  
39 19 **Short title:** Parity and persistent weight gain

40  
41 20  
42  
43 21 **Total word count:** 3080 (excluding title page, abstract, references, figures and tables)

## 23 **Abstract**

24 *Objectives:* Physiological metabolic adaptations occur in the pregnant woman. These may persist  
25 postpartum and thereby contribute to an unfavorable cardiovascular disease (CVD) risk profile in parous  
26 women. The aim of the current study is to assess time-dependent changes of cardiometabolic health in  
27 parous women compared to nulliparous women.

28 *Design and setting:* We studied data of 2459 women who participated in the PREVEND study, a  
29 population-based prospective longitudinal cohort for assessment of CVD and renal disease in the  
30 general population.

31 *Participants:* We selected women  $\geq 40$  years at the first visit, who reported no new pregnancies during  
32 the 4 follow-up visits. All women were categorized in parity groups, and stratified for age.

33 *Outcome measures:* We compared BMI, high-density lipoprotein (HDL) cholesterol, blood pressure as  
34 continuous measurements and as clinical relevant CVD risk factors among parity groups over the course  
35 of six years using generalized estimating equation (GEE) models adjusted for age.

36 *Results:* The BMI was significantly higher in women para 2 or more in all age categories: per child, the  
37 BMI was  $0.6 \text{ kg/m}^2$  higher. corresponding with 1.5–2.0 kg weight gain per child. HDL cholesterol was  
38 significantly lower in women para 2 or more aged 40-49 and 50-59 years: per child, the HDL cholesterol  
39 was up to 0.09 mmol/L lower. Blood pressure did not differ among parity groups in any of the age  
40 categories.

41 *Conclusions:* Higher parity is associated with higher BMI, lower HDL cholesterol and a higher  
42 prevalence of cardiovascular risk factors, which is constant over time. These findings warrant for  
43 prospective research assessing determinants of cardiometabolic health at earlier age to understand the  
44 role of pregnancy in the development of cardiovascular disease in women.

45  
46 **Keywords:** Pregnancy; parity; cardiovascular risk factors; BMI; HDL cholesterol; hypertension.

1  
2  
3 47 **Study summary: Strengths and limitations of this study**  
4

- 5 48 • This longitudinal cohort comprised a large, well-phenotyped cohort with uniform assessment of all  
6  
7 49 measurements during a median follow-up of 6 years.  
8  
9  
10 50 • The GEE analysis which was performed, allowed us to assess differences among groups over time,  
11  
12 51 focusing on group effects.  
13  
14 52 • Since parity itself was not assessed in this cohort, we used the number of children as a proxy for the  
15  
16 53 number of childbirths.  
17  
18  
19 54 • Women para > 2 were older, less often used oral contraceptives and more often used  
20  
21 55 antihypertensive medication which might have resulted in a slightly different metabolic profile.  
22  
23 56 • Age at first delivery, inter-pregnancy interval and lactation have not been assessed in this cohort  
24  
25 57 and therefore, adjustment of the analyses for these factors was not possible.  
26  
27  
28  
29

30 59 **Funding:** The PREVEND study was supported by Dutch Kidney Foundation (Grant E.033), The Groningen  
31  
32 60 University Medical Center (Beleidsruimte) and Dade Behring, Ausam, Roche, Abbott and Gentian who  
33  
34 61 financed laboratory equipment and reagents for various laboratory determinations. Gerbrand Zoet is  
35  
36 62 supported by the Dutch Heart Foundation (grant number 2013T083). Titia Lely is supported by the  
37  
38  
39 63 ZonMW Clinical Fellowship (40-000703-97-12463).  
40  
41  
42  
43  
44  
45  
46  
47  
48  
49  
50  
51  
52  
53  
54  
55  
56  
57  
58  
59  
60

## 66 Introduction

67 Pregnancy is associated with major alterations to the cardiovascular system and metabolic profile.<sup>1-4</sup>

68 Increases in weight, lipid levels, blood plasma volume and cardiac output are needed to maintain a  
69 healthy, physiological pregnancy. Postpartum, this maternal adaptation reverses to its pre-pregnancy  
70 state, although several changes, (e.g. increased body weight and hypercholesterolemia) may persist for  
71 several months or longer.<sup>5</sup> Possibly, these persisting changes contribute to an increased prevalence of  
72 metabolic syndrome (MetS) and an unfavorable cardiometabolic profile in parous women.<sup>6-8</sup> The  
73 amount of gestational weight gain (GWG) affects postpartum weight retention.<sup>9</sup> At long-term follow up,  
74 excessive gestational weight gain is associated with an increased BMI, up to a 3-4 kg/m<sup>2</sup> 21 years after  
75 pregnancy.<sup>10-12</sup>

76  
77 Previous studies assessing the relation between parity and cardiometabolic health showed conflicting  
78 results and even the association between parity and obesity is questioned in some studies.<sup>13-16</sup> Long-  
79 term effects have only scarcely been investigated and most studies had a follow-up of only 1 to 3 years  
80 postpartum.<sup>17,18</sup> A recent large cross-sectional study among Hispanic women in the US demonstrated  
81 that multiparity (i.e. more than 4 or more than 6 children) was associated with obesity, low HDL  
82 cholesterol and elevated fasting glucose, also after adjustment for sociodemographic and lifestyle  
83 factors.<sup>8</sup> In addition, results from the cross-sectional Rotterdam study showed a lower HDL cholesterol  
84 and higher total cholesterol and glucose/insulin ratios with higher parity in Caucasian women at 70  
85 years of age.<sup>6</sup>

86 Studies on the development of cardiovascular risk factors over time and the quantification of this effect  
87 per childbirth are conflicting. Some studies suggested a linear association between number of children  
88 and an unfavorable cardiometabolic profile, while others stated that only multiparity is associated with  
89 an increased cardiovascular disease risk.<sup>6-8,19,20</sup>

1  
2  
3 90 Some studies even showed a 'J-shaped' association in which women with two children had the lowest  
4  
5 91 prevalence of coronary heart disease.<sup>6-8</sup>  
6  
7 92 The aim of the current study was to assess time-dependent changes of cardiometabolic health in parous  
8  
9 93 women, stratified for number of children, as compared with nulliparous controls. This study was  
10  
11 94 performed in a well-defined longitudinal prospective cohort study that primarily assessed development  
12  
13 95 of CVD, albuminuria and renal disease.<sup>21</sup>  
14  
15  
16  
17  
18

## 19 97 **Methods**

### 20 21 98 **Participants**

22  
23 99 The Prevention of Renal and Vascular End-stage Disease (PREVEND) study is a longitudinal cohort follow-  
24  
25 100 up study for assessment of cardiovascular and renal disease in the general population. Details of this  
26  
27 101 study have previously been published elsewhere.<sup>22,23</sup> In summary, all inhabitants of the city of  
28  
29 102 Groningen, the Netherlands, from 1997 to 1998 at age 28–75 years (n = 85,421) were invited to  
30  
31 103 participate. All that applied, filled out a questionnaire and collected a first-morning void urine sample.  
32  
33 104 Pregnant women and subjects with type 1 diabetes mellitus were excluded. The urinary albumin  
34  
35 105 concentration was assessed in a total of 40,856 (47.8%) responders. A total of 6,000 participants were  
36  
37 106 enrolled out of 7,768 subjects with a urinary albumin concentration  $\geq 10\text{mg/L}$ . In addition, 2,592  
38  
39 107 participants were enrolled out of 3,394 subjects with a urinary albumin concentration  $< 10\text{mg/L}$ .  
40  
41 108 Thereby, the PREVEND study was enriched by subjects with an elevated albumin excretion.  
42  
43  
44 109 In total, 4,301 women were enrolled in the PREVEND study (**Figure 1**). For the current analysis, only  
45  
46 110 women aged 40 years or older at the first visit and who reported no new pregnancies during the follow-  
47  
48 111 up visits were included. Women who reported no children were categorized as nulliparous (n = 464;  
49  
50 112 18.9%). Women who reported one child, two children or more than two children, were categorized as  
51  
52  
53  
54 113 para 1 (n = 277; 11.3%), para 2 (n = 1021; 41.5%) and para > 2 (n = 697; 28.3%). The PREVEND study has

1  
2  
3 114 been approved by the medical ethics committee of the University Medical Centre Groningen. Written  
4  
5 115 informed consent was obtained from all participants.  
6  
7  
8 116

9

### 10 117 **Measurements and visits**

11  
12 118 Between 1997 and 2012, the screening visits took place every 2-4 years. Participants completed  
13  
14 119 questionnaires and underwent physical examinations. Blood samples and 24-hour urine samples were  
15  
16 120 taken. The questionnaires included questions regarding parity. Participants reported their number of  
17  
18 121 children, which was used as a proxy for the number of childbirths. Details of clinical and laboratory  
19  
20 122 measurements have previously been described elsewhere.<sup>22</sup> Prescription data from pharmacies was  
21  
22 123 used to assess the use of antihypertensive and lipid lowering medication. Hypertension was defined as a  
23  
24 124 systolic blood pressure  $\geq 140$  mmHg and/or a diastolic blood pressure  $\geq 90$  mmHg or the use of blood  
25  
26 125 pressure lowering medication. Type 2 diabetes mellitus (T2DM) was defined as a fasting plasma glucose  
27  
28 126  $\geq 7.0$  mmol/L, random sample plasma glucose  $\geq 11.1$  mmol/L, self-reported physician diagnosis of type 2  
29  
30 127 diabetes mellitus, and/or the use of glucose-lowering medication.<sup>24</sup> Obesity was defined as BMI  $\geq 30$   
31  
32 128 kg/m<sup>2</sup>.

33  
34  
35  
36 129 Data selection for analyses was based on a fixed median time interval of six years between the visits.  
37  
38  
39 130

### 40 41 131 **Statistical analysis**

42  
43 132 Data was arranged per patient per visit. Continuous variables with a normal distribution are presented  
44  
45 133 as mean  $\pm$  standard deviation (SD) and analyzed using Student *t*-test or One-Way ANOVA followed by  
46  
47 134 Tukey post-hoc analysis. Continuous variables with a skewed distribution were expressed as median  
48  
49 135 with 25<sup>th</sup>–75<sup>th</sup> percentile and analyzed using Mann-Whitney U test or Kruskal Wallis. Categorical  
50  
51 136 variables were analyzed using Pearson Chi square test or Fisher's exact test, where appropriate.  
52  
53  
54  
55  
56  
57  
58  
59  
60



1  
2  
3 137 For longitudinal assessment (time factor) of the outcome measures among the different parity groups  
4  
5 138 (group factor), a generalized estimating equations (GEE) analysis was performed, including the  
6  
7 139 interaction term group\*visit (interaction factor). All analyses were performed using an autoregressive  
8  
9 140 correlation matrix structure. This assumes a variable correlation between measurements depending on  
10  
11 141 the time between measurements, as was expected in the current analysis. For GEE analyses of  
12  
13 142 continuous dependent variables (BMI, HDL cholesterol and MAP), participants were further stratified in  
14  
15 143 three age categories (40 – 49 years old, 50 – 59 years old, and  $\geq 60$  years old). In addition, we performed  
16  
17 144 a stepwise correction strategy, correcting for age (model 1), age and education (model 2), age and oral  
18  
19 145 contraceptive use (model 3) and age, education and oral contraceptive use (model 4).  
20  
21  
22  
23 146 Data were analyzed using SPSS 22.0 (SPSS Inc. Chicago, IL, USA) and GraphPad prism 5.01 (GraphPad  
24  
25 147 Software Inc. San Diego, CA, USA). In all analyses, a p-value  $<0.05$  was considered statistically significant.  
26  
27  
28  
29

## 30 149 **Results**

### 31 150 **Study population**

32  
33  
34 151 **Table 1** provides an overview of the baseline characteristics of women who were nulliparous, para 1,  
35  
36 152 para 2 and para  $> 2$  at the first PREVEND visit. The mean age was significantly higher in women who  
37  
38 153 were para  $> 2$ . The majority of all women were Caucasian. The median follow-up time was 6 years in all  
39  
40 154 groups. The cardiovascular risk profile among the parity groups differed significantly on BMI, blood  
41  
42 155 pressure, smoking and use of alcohol. Unfavorable blood glucose measurements and cholesterol profiles  
43  
44 156 were related to higher parity. The use of blood pressure lowering medication was higher in women who  
45  
46 157 were para  $> 2$  compared to the other groups, but the use of glucose and lipid lowering medication did  
47  
48 158 not differ among the groups. Women who were para  $> 2$  less often used oral contraceptives compared  
49  
50 159 to women who were nulliparous, para 1 or para 2.  
51  
52  
53  
54  
55  
56  
57  
58  
59  
60

### 161 **Cardiometabolic profile in relation to parity and age**

162 During the 6-year study period, there was a constant, significant difference in BMI among the parity  
163 groups at all age categories (**Figure 2A**). The BMI was higher with every increase of parity at all age  
164 categories: per child, the BMI was 0.6kg/m<sup>2</sup> higher, equal to 1.5-2.0 kg. In women para > 2, the  
165 BMI was 0.7–2.0 kg/m<sup>2</sup> higher compared to the other parity groups. Over time, BMI increased  
166 significantly in all age groups ( $p_{\text{time}} < 0.001$ ), the change in BMI over time was similar among all parity  
167 groups ( $p_{\text{interaction}} = 0.662-0.947$ ). In a stepwise correction model, correction for age alone and correction  
168 for age and oral contraceptive use did not influence the differences in BMI among parity groups at all  
169 age categories (**Supplemental table 1**). After correction for age, education level and oral contraceptive  
170 use, differences among parity groups were not statistically significant anymore at age 50-59 years only.

171  
172 The prevalence of obesity increased with increasing parity at entry ( $p_{\text{for trend}} < 0.001$ ) and at 6 year follow  
173 up ( $p_{\text{for trend}} < 0.001$ ; **Figure 3**). At visit one, 15% of the nulliparous women was obese, compared to 26% of  
174 the women para >2. After the course of six years, this was increased to 16% of the nulliparous women  
175 compared to 30% of the para >2. The increase in prevalence over time was similar among the groups  
176 ( $p = 0.450$ ). In a stepwise correction model, correction for age alone and correction for age and oral  
177 contraceptive use did not influence the differences in HDL cholesterol among parity groups at all age  
178 categories (**Supplemental table 1**). After correction for age, education level and oral contraceptive use,  
179 differences among parity groups were not statistically significant anymore at all age groups.

180  
181 HDL cholesterol differed among the groups, except for participants aged  $\geq 60$  years (**Figure 2B**). The  
182 HDL cholesterol was lower with every increase of parity, except for participants older than 60  
183 years: per child, the HDL decreased with 0.05 mmol/L. Women para 2 and women para > 2 had

1  
2  
3 184 significant lower HDL cholesterol at both measurements compared to nulliparous women aged 40–49  
4  
5 185 years (0.08–0.12 mmol/L) and 50–59 years (0.10–0.17 mmol/L). Over time, HDL cholesterol increased  
6  
7 186 significantly in all age groups ( $p_{\text{time}}=0.001\text{--}0.007$ ) and the change in HDL cholesterol over time was  
8  
9 187 similar among all parity groups ( $p_{\text{interaction}}=0.163\text{--}0.530$ ).

10 188 Low HDL cholesterol (<1.29 mmol/L) prevalence differed among the groups at visit one ( $p_{\text{for trend}}<0.001$ )  
11  
12 189 and at follow up visit ( $p_{\text{for trend}}=0.006$ ); low HDL cholesterol was more common when parity increased  
13  
14 190 **(Figure 3)**. Low HDL cholesterol prevalence inclined similar in all groups over time ( $p=0.160$ ).  
15  
16  
17  
18  
19 191

20  
21 192 There were no differences among the parity groups over time in MAP at all ages, although MAP  
22  
23 193 increased in all groups at age 40–49 years and 50–59 years and decreased in all groups at age  $\geq 60$  years  
24  
25 194 **(Figure 2C)**. The change in MAP over time was similar among all parity groups ( $p_{\text{interaction}}=0.348\text{--}0.815$ ).

26  
27 195 Prevalence of hypertension increased with parity both at entry visit ( $p_{\text{for trend}}<0.001$ ) and at follow up  
28  
29 196 ( $p_{\text{for trend}}<0.001$ ). Hypertension prevalence increased similar in all groups over time by 4–10% ( $p=0.761$ ;  
30  
31 197 **Figure 3**).

32  
33  
34 198  
35  
36 199 Occurrence of T2DM did not differ among the groups at entry ( $p_{\text{for trend}}=0.094$ ), although a positive  
37  
38 200 association was found between T2DM prevalence and parity after six years ( $p_{\text{for trend}}=0.018$ ). The increase  
39  
40 201 in T2DM over time was comparable at all groups ( $p=0.336$ ). T2DM prevalence was < 10% at all groups at  
41  
42 202 both visits **(Figure 3)**.

## 43 44 203 45 46 204 **Discussion**

47  
48 205 In this longitudinal cohort study, having 2 children or more was associated with a higher BMI in all age  
49  
50 206 categories and with a lower HDL cholesterol, but not with changes in blood pressure. A higher parity was  
51  
52 207 associated with higher prevalence of obesity, low HDL cholesterol and a higher prevalence of  
53  
54  
55  
56  
57  
58  
59  
60

1  
2  
3 208 hypertension. These associations were constant over time. As analyses were stratified and/or  
4  
5 209 adjusted for age, these results suggest a direct association of parity itself with BMI, HDL cholesterol  
6  
7 210 levels and cardiovascular risk factor prevalence. Other factors attributing to parity, i.e. socio-economic  
8  
9 211 status and oral contraceptive use, might have contributed to these differences.  
10  
11  
12 212  
13  
14 213 Especially the effect of parity on BMI is of great interest, since BMI appears to be one of the most  
15  
16 214 important cardiometabolic risk factors. This is not only due to the direct effect on cardiovascular disease  
17  
18 215 onset, but also due to its adverse effect on lipid profile and blood pressure.<sup>25–28</sup> Results from a  
19  
20 216 population-based cohort study among 4699 women suggested that weight or weight changes might be  
21  
22 217 an important mediator in the effect of parity on metabolic syndrome, thus confirming the importance of  
23  
24 218 BMI in regard to cardiometabolic health.<sup>19</sup> In our study, roughly each extra child is associated with 1.5–  
25  
26 219 2.0 kg weight gain. Similar, each extra child is associated with 0.05 mmol/L decrease in HDL cholesterol,  
27  
28 220 which might be the result of the increased BMI.  
29  
30  
31 221  
32  
33 222 Parallel to these metabolic differences in continuous measurements among the groups, occurrence of  
34  
35 223 several clinical relevant cardiovascular risk factors, such as obesity and hypertension, differed among  
36  
37 224 the groups as well. This is in line with cross-sectional studies assessing metabolic profile in relation to  
38  
39 225 the number of children.<sup>6–8,19</sup> However, some studies could not confirm the relation between parity and  
40  
41 226 metabolic health, especially after adjustment for covariates such as lifestyle.<sup>14,15,19,29</sup> In the stepwise  
42  
43 227 correction, we found no or minimal influence of age, age and education level or age and oral  
44  
45 228 contraceptive use on our results. Only after full correction for age, education level and oral  
46  
47 229 contraceptive use, the statistical significance among parity groups diminished. Consequently, our  
48  
49 230 findings should be interpreted with caution, as these factors and others, such as lifestyle changes  
50  
51 231 following childbirth, might influence cardiovascular health next to parity itself.<sup>29</sup> Moreover, lifestyle  
52  
53  
54  
55  
56  
57  
58  
59  
60

1  
2  
3 232 effects of family life and the protective effect of lactation could explain the influence of parity on  
4  
5 233 cardiometabolic health.<sup>30–32</sup>  
6  
7 234  
8  
9  
10 235 Another possible explanation behind the mechanism of this relationship between parity and  
11  
12 236 cardiovascular risk factors could be found in the effect of disturbances by pregnancy itself that continue  
13  
14 237 to last postpartum. For example, breastfeeding is associated with a lower risk of cardiovascular risk  
15  
16 238 factors, i.e. T2DM, although the role of breastfeeding remains controversial and a recent meta-analysis  
17  
18 239 showed no significant effect of breastfeeding on postpartum weight retention.<sup>33–36</sup> Other factors  
19  
20 240 involved in the relationship between parity and cardiovascular risk factors might be found in circulation  
21  
22 241 markers. An example might be found in the ovarian peptide hormone relaxin, produced by the corpus  
23  
24 242 luteum or placental throughout pregnancy, has emerged as cardiovascular modulator involved in  
25  
26 243 vasodilatation and inducing angiogenesis.<sup>37,38</sup> Moreover, relaxin was positively associated with insulin  
27  
28 244 sensitivity and lipid profile in women with type 2 diabetes mellitus as well.<sup>39</sup>  
29  
30 245 Previous cohort studies showed a ‘J-shaped’ association between parity and coronary heart disease,  
31  
32 246 with lowest prevalence in women with two children, or stated that only multiparity (i.e. more than four  
33  
34 247 or five children) was associated with increased cardiovascular disease risk.<sup>6–8</sup> However, our results  
35  
36 248 indicate a stepwise effect of parity on cardiometabolic health and having two children or more than two  
37  
38 249 children already affects BMI, HDL cholesterol levels and cardiovascular risk factor prevalence.  
39  
40  
41 250  
42  
43 251 Our paper is the first study providing detailed assessment of cardiometabolic health development over  
44  
45 252 time in relation to parity. This longitudinal study comprised a large, well-phenotyped cohort with  
46  
47 253 uniform assessment of all measurements during a median follow-up of 6 years. The GEE analysis which  
48  
49 254 was performed, allowed us to assess differences among groups over time, focusing on group effects.  
50  
51 255 However, several limitations need to be discussed. The mean age of women para > 2 was significantly  
52  
53  
54  
55  
56  
57  
58  
59  
60

1  
2  
3 256 higher than women who were nulliparous, para 1 or para 2. In addition, women para > 2 less often used  
4  
5 257 oral contraceptives and more often used antihypertensive medication. This might result in a slightly  
6  
7 258 different metabolic profile although correction of the GEE-analysis for age and oral contraceptive use  
8  
9  
10 259 did not significantly change the results. Despite extensive phenotyping, age at first delivery, inter-  
11  
12 260 pregnancy interval and lactation have not been assessed in the PREVEND study and therefore,  
13  
14 261 adjustment of the analyses for these factors was not possible. Since parity itself was not assessed in the  
15  
16 262 PREVEND, we used the number of children as a proxy for the number of childbirths. This might lead to  
17  
18 263 inaccurate estimates of parity numbers, as the possibility of surrogacy or twin pregnancies is not taken  
19  
20  
21 264 into account. Additionally, no information was available regarding subfertility and several pregnancy  
22  
23 265 complications, which leads to a lower number of children in these women and might reflect influence  
24  
25 266 the cardiometabolic profile in later life as well. Lastly, pre-pregnancy BMI and gestational weight gain  
26  
27 267 have not been assessed in the PREVEND study either, although their role on postpartum weight  
28  
29  
30 268 retention seemed limited in a recent publication.<sup>9,18</sup>

31  
32 269  
33  
34 270 The PREVEND study was enriched with subjects with an elevated albumin excretion, which mostly  
35  
36 271 results in an unfavorable cardiovascular risk profile compared to the general population. However,  
37  
38 272 albuminuria did not significantly differ among the groups within our analyses. In addition, adjustment  
39  
40 273 for albuminuria did not change the results (data not shown). Although our findings suggest an effect of  
41  
42 274 parity itself on metabolic parameters, it should be noted that causality cannot be determined in our  
43  
44 275 study. Therefore, one could argue that the relationship is reversed, e.g. women with higher BMI or  
45  
46 276 lower HDL cholesterol are more fertile and therefore have more children. Prospective research assessing  
47  
48 277 pre-pregnancy determinants of cardiometabolic health are warranted to further assess the possible  
49  
50 278 causal effect of pregnancy itself.

51  
52  
53  
54  
55 279  
56  
57  
58  
59  
60

## 280 Conclusion

281 In this longitudinal cohort study, higher parity is associated with higher BMI and lower HDL  
282 cholesterol. This difference among parity groups is constant over time. Furthermore, higher parity is  
283 associated with a higher prevalence of cardiovascular risk factors among the parity groups over time.  
284 These findings warrant for prospective research assessing determinants of cardiometabolic health at  
285 earlier age to understand the role of pregnancy in the development of cardiovascular disease in women.

## 287 References

- 288 1. Bartels a., O'Donoghue K. Cholesterol in pregnancy: a review of knowns and unknowns. *Obstet Med.* 2011;4(4):147-  
289 151. doi:10.1258/om.2011.110003.
- 290 2. Tan EK, Tan EL. Alterations in physiology and anatomy during pregnancy. *Best Pract Res Clin Obstet Gynaecol.*  
291 2013;27(6):791-802. doi:10.1016/j.bpobgyn.2013.08.0011.
- 292 3. Jebeile H, Mijatovic J, Louie JCY, Prvan T, Brand-Miller JC. A systematic review and metaanalysis of energy intake and  
293 weight gain in pregnancy. *Am J Obstet Gynecol.* 2016;214(4):465-483. doi:10.1016/j.ajog.2015.12.049.
- 294 4. de Haas S, Ghossein-Doha C, van Kuijk SM, van Drongelen J, Spaanderman ME. Physiologic adaptation of plasma  
295 volume during pregnancy: a systematic review and meta-analysis. *Ultrasound Obstet Gynecol.* 2016;d(November  
296 2016):177-187. doi:10.1002/uog.17360.
- 297 5. Berge L, Arnesen E, Forsdahl A. Pregnancy related changes in some cardiovascular risk factors. *Acta Obstet Gynecol*  
298 *Scand.* 1996;75(5):439-442.
- 299 6. Humphries KH, Westendorp ICD, Bots ML, et al. Parity and Carotid Artery Atherosclerosis in Elderly Women: The  
300 Rotterdam Study. *Stroke.* 2001;32:2259-2264.
- 301 7. Lawlor D a., Emberson JR, Ebrahim S, et al. Is the association between parity and coronary heart disease due to  
302 biological effects of pregnancy or adverse lifestyle risk factors associated with child-rearing? Findings from the British  
303 women's heart and health study and the British regional heart st. *Circulation.* 2003;107(9):1260-1264.  
304 doi:10.1161/01.CIR.0000053441.43495.1A.
- 305 8. Vladutiu CJ, Siega-Riz AM, Sotres-Alvarez D, et al. Parity and components of the metabolic syndrome among US  
306 hispanic/latina women: Results from the hispanic community health study/study of latin@s. *Circ Cardiovasc Qual*  
307 *Outcomes.* 2016;9(2\_suppl\_1):S62-S69. doi:10.1161/CIRCOUTCOMES.115.002464.
- 308 9. Rong K, Yu K, Han X, et al. Pre-pregnancy BMI, gestational weight gain and postpartum weight retention: a meta-  
309 analysis of observational studies. *Public Health Nutr.* 2015;18(12):2172-2182. doi:10.1017/S1368980014002523.
- 310 10. Amorim AR, Rössner S, Neovius M, Lourenço PM, Linné Y. Does excess pregnancy weight gain constitute a major risk  
311 for increasing long-term BMI? *Obesity (Silver Spring).* 2007;15(5):1278-1286. doi:10.1038/oby.2007.149.
- 312 11. Al Mamun a. Associations of excess weight gain during pregnancy with long-term maternal obesity, hypertension and  
313 diabetes: Evidence from 21 years postpartum follow-up. *Obes Rev.* 2010;11:51. doi:http://dx.doi.org/10.1111/j.1467-  
314 789X.2010.00763-4.x.

- 1  
2  
3 315 12. Fraser a, Tilling K, Macdonald C, Hughes R, Sattar N. Associations of gestational weight gain with maternal body mass  
4 316 index, waist circumference, and blood pressure measured 16 y after pregnancy: the Avon Longitudinal Study of Parents  
5 317 and Children. *Am J Clin Nutr.* 2011;93(6):1-4. doi:10.3945/ajcn.110.008326.1.
- 6 318 13. Steenland K, Lally C, Thun Mi. Parity and COronary Heart Disease among Women in the American Cancer Society CPS II  
7 319 Population. *Epidemiology.* 1996;7:641-643.
- 8 320 14. de Kleijn MJ, van der Schouw YT, van der Graaf Y. Reproductive history and cardiovascular disease risk in  
9 321 postmenopausal women: a review of the literature. *Maturitas.* 1999;33(1):7-36.
- 10 322 15. Chung E, Kim Y, Usen O. Associations Between Parity, Obesity, and Cardiovascular Risk Factors Among Middle-Aged  
11 323 Women. *J Women's Heal.* 2016;25(8):818-825. doi:10.1089/jwh.2015.5581.
- 12 324 16. Robinson WR, Cheng MM, Hoggatt KJ, Stürmer T, Siega-Riz AM. Childbearing is not associated with young women's  
13 325 long-term obesity risk. *Obesity.* 2014;22(4):1126-1132. doi:10.1002/oby.20593.
- 14 326 17. Schmitt NM, Nicholson WK, Schmitt J. The association of pregnancy and the development of obesity - results of a  
15 327 systematic review and meta-analysis on the natural history of postpartum weight retention. *Int J Obes (Lond).*  
16 328 2007;31(11):1642-1651. doi:10.1038/sj.ijo.0803655.
- 17 329 18. Nehring I, Schmoll S, Beyerlein A, Hauner H, Von Kries R. Gestational weight gain and long-term postpartum weight  
18 330 retention: A meta-analysis. *Am J Clin Nutr.* 2011;94(5):1225-1231. doi:10.3945/ajcn.111.015289.
- 19 331 19. Cohen A, Pieper CF, Brown AJ, Bastian L a. Number of children and risk of metabolic syndrome in women. *J Womens*  
20 332 *Health (Larchmt).* 2006;15(6):763-773. doi:10.1089/jwh.2006.15.763.
- 21 333 20. Ness RB, Harris T, Cobb J, et al. Number of pregnancies and the subsequent risk of cardiovascular disease. *N Engl J*  
22 334 *Med.* 1993;328:1528-1533.
- 23 335 21. Pinto-Sietsma S-J, Mulder J, Janssen WMT, Hillege HL, Zeeuw D De, De Jong PE. Smoking Is Related to Albuminuria and  
24 336 Abnormal Renal Function in Nondiabetic Persons. *Ann Intern Med.* 2000;(133):585-591.
- 25 337 22. Hillege HL, Janssen WMT, Bak a. a. a, et al. Microalbuminuria is common, also in a nondiabetic, nonhypertensive  
26 338 population, and an independent indicator of cardiovascular risk factors and cardiovascular morbidity. *J Intern Med.*  
27 339 2001;249(6):519-526. doi:10.1046/j.1365-2796.2001.00833.x.
- 28 340 23. Joosten MM, Gansevoort RT, Mukamal KJ, Harst P Van Der, Geleijnse JM, Feskens EJM. Urinary and plasma magnesium  
29 341 and risk of ischemic heart disease 1 – 3. *October.* 2013;97(13):1299-1306.  
30 342 doi:10.3945/ajcn.112.054114.INTRODUCTION.
- 31 343 24. Abbasi A, Corpeleijn E, Gansevoort RT, et al. Role of HDL cholesterol and estimates of HDL particle composition in  
32 344 future development of type 2 diabetes in the general population: The PREVEND study. *J Clin Endocrinol Metab.*  
33 345 2013;98(8):1352-1359. doi:10.1210/jc.2013-1680.
- 34 346 25. Lamon-Fava S, Wilson PWF, Schaefer EJ. Impact of Body Mass Index on Coronary Heart Disease Risk Factors in Men and  
35 347 Women: The Framingham Offspring Study. *Arterioscler Thromb Vasc Biol.* 1996;16:1509-15151.
- 36 348 26. Wilson PWF, D'Agostino RB, Sullivan L, Parise H, Kannel WB. Overweight and obesity as determinants of cardiovascular  
37 349 risk: the Framingham experience. *Arch Intern Med.* 2002;162(16):1867-1872. doi:10.1001/archinte.162.16.1867.
- 38 350 27. Bogers R, Bemelmans W, Hoogenveen R, et al. Association of overweight with increased risk of coronary heart disease  
39 351 partly independent of blood pressure and cholesterol levels. *Arch Intern Med.* 2007;167(16):1720-1728.  
40 352 doi:10.1001/archinte.167.16.1720.
- 41 353 28. Mongraw-Chaffin ML, Peters S a E, Huxley RR, Woodward M. The sex-specific relationship between body mass index  
42  
43  
44  
45  
46  
47  
48  
49  
50  
51  
52  
53  
54  
55  
56  
57  
58  
59  
60



- 1  
2  
3 354 and coronary heart disease: A systematic review and meta-analysis of 95 cohorts with 1.2 million participants. *Lancet*  
4 355 *Diabetes Endocrinol.* 2015;3(6):437-449. doi:10.1002/aur.1474.Replication.  
5  
6 356 29. Hardy R, Lawlor D a., Black S, Wadsworth MEJ, Kuh D. Number of children and coronary heart disease risk factors in  
7 357 men and women from a British birth cohort. *BJOG An Int J Obstet Gynaecol.* 2007;114(6):721-730. doi:10.1111/j.1471-  
8 358 0528.2007.01324.x.  
9  
10 359 30. Gunderson EP, Jacobs DR, Chiang V, et al. Childbearing is associated with higher incidence of the metabolic syndrome  
11 360 among women of reproductive age controlling for measurements before pregnancy: the CARDIA study. *Am J Obstet*  
12 361 *Gynecol.* 2009;201(2):177.e1-177.e9. doi:10.1016/j.ajog.2009.03.031.  
13  
14 362 31. McClure CK, Catov JM, Ness RB, Schwarz EB. Lactation and maternal subclinical cardiovascular disease among  
15 363 premenopausal women. *Am J Obstet Gynecol.* 2012;207(1):1-15. doi:10.1016/j.ajog.2012.04.030.  
16  
17 364 32. Natland Fagerhaug T, Forsmo S, Jacobsen GW, Midthjell K, Andersen LF, Ivar Lund Nilsen T. A prospective population-  
18 365 based cohort study of lactation and cardiovascular disease mortality: the HUNT study. *BMC Public Health.*  
19 366 2013;13(1):1070. doi:10.1186/1471-2458-13-1070.  
20  
21 367 33. Baker JL, Gamborg M, Heitmann BL, Lissner L, Sørensen TI a, Rasmussen KM. Breastfeeding reduces postpartum weight  
22 368 retention. *Am J Clin Nutr.* 2008;88(6):1543-1551. doi:10.3945/ajcn.2008.26379.  
23  
24 369 34. Jarlenski MP, Bennett WL, Bleich SN, Barry CL, Stuart E a. Effects of breastfeeding on postpartum weight loss among  
25 370 U.S. women. *Prev Med.* 14AD;69:146-150. doi:10.1016/j.ypped.2014.09.018.Effects.  
26  
27 371 35. Britz SE, McDermott KC, Pierce CB, Blomquist JL, Handa VL. Changes in maternal weight 5-10 years after a first delivery.  
28 372 *Womens Health (Lond Engl).* 2012;8(5):513-519. doi:10.2217/whe.12.35.  
29  
30 373 36. He X, Zhu M, Hu C, et al. Breast-feeding and postpartum weight retention: a systematic review and meta-analysis.  
31 374 *Public Health Nutr.* 2015;18(18):3308-3316. doi:10.1017/S1368980015000828.  
32  
33 375 37. Sherwood OD. Relaxin's physiological roles and other diverse actions. *Endocr Rev.* 2004;25(2):205-234.  
34 376 doi:10.1210/er.2003-0013.  
35  
36 377 38. Bani D. Relaxin as a natural agent for vascular health. *Vasc Health Risk Manag.* 2008;4(3):515-524.  
37 378 39. Szepietowska B, Gorska M, Szelachowska M. Plasma relaxin concentration is related to beta-cell function and insulin  
38 379 sensitivity in women with type 2 diabetes mellitus. *Diabetes Res Clin Pract.* 2008;79(3):2007-2009.  
39 380 doi:10.1016/j.diabres.2007.10.017.  
40  
41 381

## 382 **Competing interests**

42 383 All authors have completed the Unified Competing Interest form at [www.icmje.org/coi\\_disclosure.pdf](http://www.icmje.org/coi_disclosure.pdf)  
43  
44 384 (available on request from the corresponding author) and declare no support from any organization for  
45  
46 385 the submitted work; no relationships with companies that might have an interest in the submitted work  
47  
48 386 in the previous 3 years; no other relationships or activities that could appear to have influenced the  
49  
50  
51 387 submitted work.  
52  
53  
54  
55 388

1  
2  
3 389 **Author's contributions**  
4

5 390 GAZ, NDP, KJG, RTG, HG and ATL were involved in conception and design of the study. GAZ, KJG  
6  
7  
8 391 and ATL drafted the manuscript. All authors edited the manuscript; all authors read and  
9  
10 392 approved the final manuscript.  
11

12 393

13  
14  
15 394 **Data sharing statement**  
16

17 395 Data sharing: patient level data and full dataset and technical appendix and statistical code are available  
18  
19 396 from the corresponding author (g.zoet@umcutrecht.nl). Informed consent was not obtained but the  
20  
21 397 presented data are anonymized and the risk of identification is low.  
22

23  
24 398  
25  
26  
27  
28  
29  
30  
31  
32  
33  
34  
35  
36  
37  
38  
39  
40  
41  
42  
43  
44  
45  
46  
47  
48  
49  
50  
51  
52  
53  
54  
55  
56  
57  
58  
59  
60

1  
2  
3  
4  
5  
6  
7  
8  
9  
10  
11  
12  
13  
14  
15  
16  
17  
18  
19  
20  
21  
22  
23  
24  
25  
26  
27  
28  
29  
30  
31  
32  
33  
34  
35  
36  
37  
38  
39  
40  
41  
42  
43  
44  
45  
46  
47  
48  
49  
50  
51  
52  
53  
54  
55  
56  
57  
58  
59  
60

399 **Figure 1: Flowchart**

400

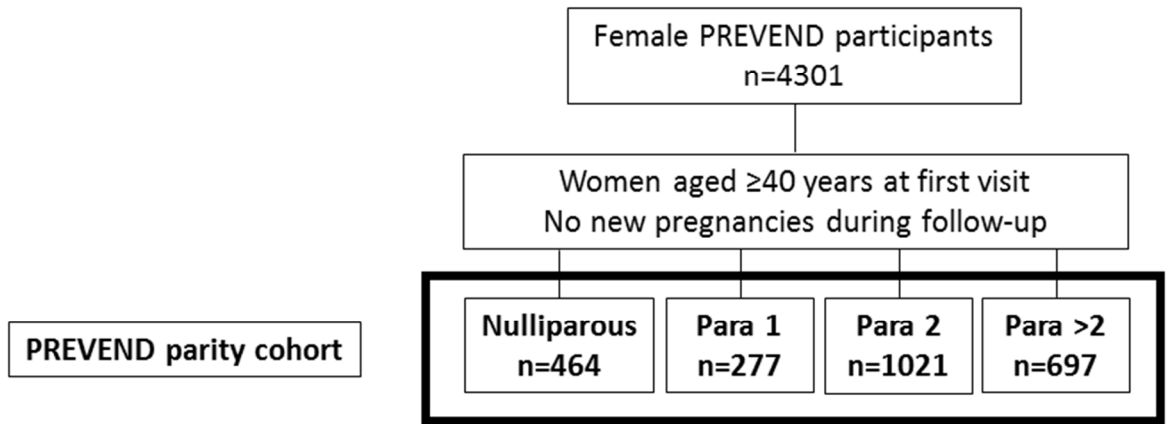

401

402

Peer review only

403 **Table 1: at entry table PREVEND stratified for parity**

|                                          | No children<br>(N=464) ‡ | One child<br>(N=277) ‡ | Two children<br>(N=1021) ‡ | More than two<br>children<br>(N=697) ‡ | P-value |
|------------------------------------------|--------------------------|------------------------|----------------------------|----------------------------------------|---------|
| <b>General characteristics</b>           |                          |                        |                            |                                        |         |
| Age (years)                              | 52.2 (10.1)              | 52.2 (9.0)             | 52.3 (8.4)                 | 56.9 (9.6)                             | <0.001  |
| Follow-up time (years)                   | 11 (11-12)               | 11 (11-12)             | 11 (11-12)                 | 11 (11-12)                             | 0.71    |
| Caucasian (n (%))                        | 445 (96.9%)              | 264 (96.4%)            | 995 (98.0%)                | 663 (95.7%)                            | 0.04    |
| Job (n (%))                              | 315 (68.3%)              | 127 (47.4%)            | 467 (46.5%)                | 264 (38.6%)                            | <0.001  |
| <b>Cardiovascular risk profile</b>       |                          |                        |                            |                                        |         |
| BMI (kg/m <sup>2</sup> )                 | 24.6 (22.5-27.7)         | 25.3 (22.5-28.6)       | 25.8 (23.4-28.8)           | 26.9 (24.0-30.2)                       | <0.001  |
| SBP (mmHg)                               | 120 (109-138)            | 121 (110-140)          | 122 (111-138)              | 130 (115-146)                          | <0.001  |
| DBP (mmHg)                               | 71 (65-78)               | 71 (67-77)             | 71 (66-78)                 | 73 (67-79)                             | 0.004   |
| Current smoker (n (%))                   | 139 (30.0%)              | 105 (37.9%)            | 326 (31.9%)                | 195 (28.0%)                            | 0.02    |
| Alcohol use (n (%))                      | 203 (44.0%)              | 137 (49.6%)            | 503 (49.4%)                | 378 (54.5%)                            | 0.007   |
| Cardiovascular comorbidity (n (%))       | 11 (2.4%)                | 11 (4.1%)              | 24 (2.4%)                  | 24 (3.6%)                              | 0.30    |
| Renal disease requiring dialysis (n (%)) | 1 (0.2%)                 | 0 (0%)                 | 3 (0.3%)                   | 1 (0.1%)                               | 0.78    |
| <b>Laboratory results</b>                |                          |                        |                            |                                        |         |
| Glucose (mmol/L)                         | 4.6 (4.3-5.0)            | 4.7 (4.3-5.1)          | 4.7 (4.3-5.0)              | 4.8 (4.4-5.2)                          | 0.002   |
| Insulin (mmol/L)                         | 7.0 (4.9-10.7)           | 7.6 (5.1-11.5)         | 7.8 (5.6-11.2)             | 8.5 (6.0-13.4)                         | <0.001  |
| HOMA <sub>1c</sub>                       | 1.4 (1.0-2.4)            | 1.6 (1.0-2.5)          | 1.6 (1.1-2.4)              | 1.8 (1.2-3.0)                          | <0.001  |
| Total Cholesterol (mmol/L)               | 5.7 (5.0-6.4)            | 5.7 (5.1-6.5)          | 5.8 (5.0-6.7)              | 6.0 (5.3-6.7)                          | <0.001  |
| HDL Cholesterol (mmol/L)                 | 1.5 (1.2-1.8)            | 1.5 (1.2-1.8)          | 1.4 (1.2-1.7)              | 1.4 (1.2-1.7)                          | <0.001  |
| Triglycerides (mmol/L)                   | 1.0 (0.8-1.5)            | 1.1 (0.9-1.7)          | 1.1 (0.9-1.6)              | 1.2 (0.9-1.6)                          | <0.001  |
| <b>Medication use</b>                    |                          |                        |                            |                                        |         |
| Total blood pressure lowering (n (%))    | 65 (16.4%)               | 39 (16.5%)             | 140 (15.6%)                | 151 (24.4%)                            | <0.001  |
| ACEi/ARB (n (%))                         | 19 (4.7%)                | 8 (3.3%)               | 41 (4.5%)                  | 44 (7.0%)                              | 0.07    |
| Glucose lowering (n (%))                 | 7 (1.7%)                 | 2 (0.8%)               | 12 (1.3%)                  | 12 (1.9%)                              | 0.63    |
| Lipid lowering (n (%))                   | 19 (4.7%)                | 15 (6.3%)              | 32 (3.5%)                  | 37 (5.9%)                              | 0.11    |
| Oral contraceptive use (n (%))           | 79 (18.2%)               | 50 (19.5%)             | 198 (21.1%)                | 90 (14.6%)                             | 0.01    |

405 Data are presented as median (25<sup>th</sup> – 75<sup>th</sup> percentile) unless otherwise stated. BMI: body mass index; SBP: systolic blood pressure; DBP: diastolic  
406 blood pressure; ACEi/ARB: angiotensin converting enzyme inhibitor and/or angiotensin receptor blocker; HOMA<sub>1c</sub>: homeostatic model  
407 assessment index.

408 ‡ Total number that participated at visit 1 of the study, not all variables were available for each participant at baseline

409 Figure 2: Development over time of BMI (A), HDL cholesterol (B) and MAP (C), stratified for parity

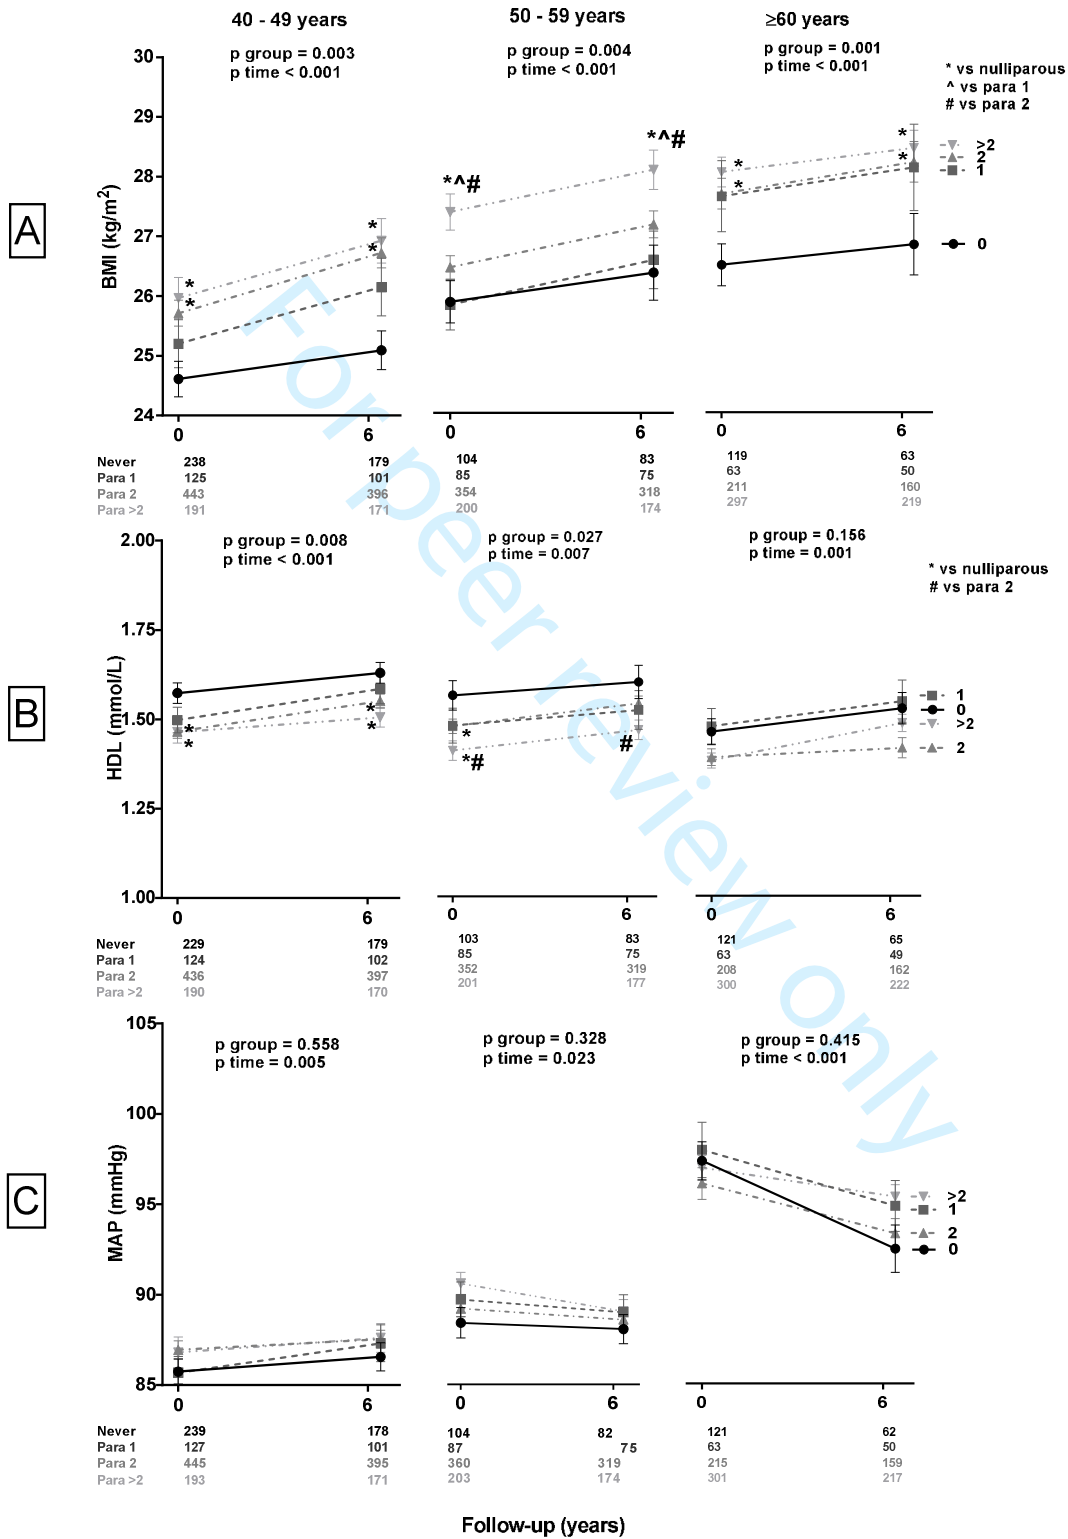

410

411 **Figure 3: CVD risk factors at entry**

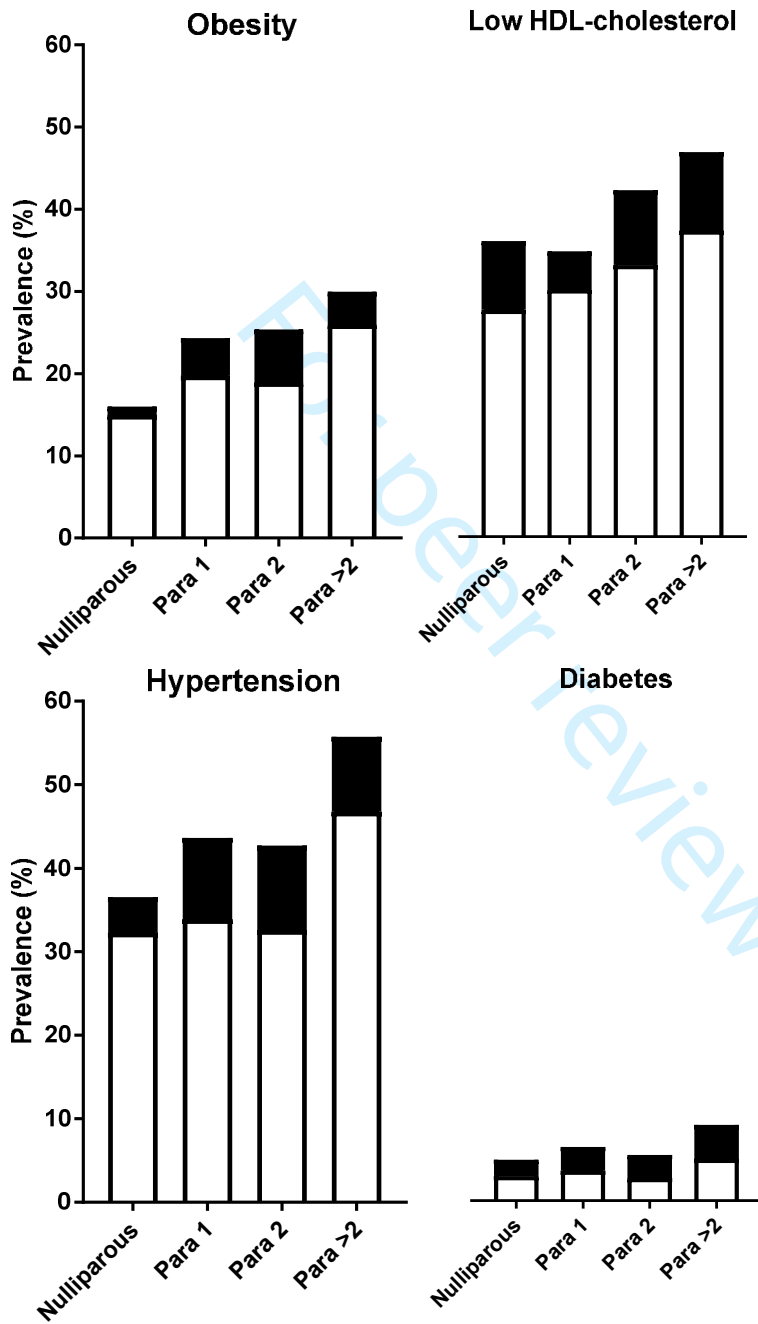

412  
 413 Legend: Hypertension = RR  $\geq$ 140/90 mm/Hg and/or use of antihypertensive medication;  
 414 Obesity = BMI  $\geq$ 30kg/m<sup>2</sup>; Low HDL cholesterol = HDL cholesterol <1.29 mmol/L;  
 415 Diabetes = fasting plasma glucose  $\geq$ 7.0 mmol/L, self-report of a physician  
 416 diagnosis and/or use of glucose-lowering medication.  
 417 □ = first visit; ■ = follow-up visit

**Supplemental table 1: stepwise correction for GEE-analysis**

**Table 1A:** Correction models for GEE-analysis, stratified at age 40 – 50 years

|                 | Unadjusted         |                   |                          | Adjusted for age   |                   |                          | Adjusted for age & SES |                   |                          | Adjusted for age & OCC |                   |                          | Adjusted for age & SES & OCC |                   |                          |
|-----------------|--------------------|-------------------|--------------------------|--------------------|-------------------|--------------------------|------------------------|-------------------|--------------------------|------------------------|-------------------|--------------------------|------------------------------|-------------------|--------------------------|
|                 | P <sub>group</sub> | P <sub>time</sub> | P <sub>interaction</sub> | P <sub>group</sub> | P <sub>time</sub> | P <sub>interaction</sub> | P <sub>group</sub>     | P <sub>time</sub> | P <sub>interaction</sub> | P <sub>group</sub>     | P <sub>time</sub> | P <sub>interaction</sub> | P <sub>group</sub>           | P <sub>time</sub> | P <sub>interaction</sub> |
| BMI             | 0.003              | <0.001            | 0.667                    | 0.011              | 0.938             | 0.694                    | 0.323                  | 0.552             | 0.685                    | 0.010                  | 0.910             | 0.627                    | 0.342                        | 0.64              | 0.628                    |
| HDL-cholesterol | 0.008              | <0.001            | 0.530                    | 0.003              | 0.737             | 0.520                    | 0.047                  | 0.472             | 0.519                    | 0.006                  | 0.666             | 0.570                    | 0.080                        | 0.438             | 0.565                    |
| MAP             | 0.558              | 0.005             | 0.815                    | 0.866              | <0.001            | 0.779                    | 0.871                  | <0.001            | 0.777                    | 0.874                  | <0.001            | 0.875                    | 0.904                        | <0.001            | 0.871                    |

Abbreviations: SES, Socio-economic status; OCC, oral contraceptives

**Table 1B:** Correction models for GEE-analysis, stratified at age 50 – 60 years

|                 | Unadjusted         |                   |                          | Adjusted for age   |                   |                          | Adjusted for age & SES |                   |                          | Adjusted for age & OCC |                   |                          | Adjusted for age & SES & OCC |                   |                          |
|-----------------|--------------------|-------------------|--------------------------|--------------------|-------------------|--------------------------|------------------------|-------------------|--------------------------|------------------------|-------------------|--------------------------|------------------------------|-------------------|--------------------------|
|                 | P <sub>group</sub> | P <sub>time</sub> | P <sub>interaction</sub> | P <sub>group</sub> | P <sub>time</sub> | P <sub>interaction</sub> | P <sub>group</sub>     | P <sub>time</sub> | P <sub>interaction</sub> | P <sub>group</sub>     | P <sub>time</sub> | P <sub>interaction</sub> | P <sub>group</sub>           | P <sub>time</sub> | P <sub>interaction</sub> |
| BMI             | 0.004              | <0.001            | 0.947                    | 0.006              | 0.197             | 0.945                    | 0.009                  | 0.031             | 0.920                    | 0.011                  | 0.269             | 0.849                    | 0.017                        | 0.048             | 0.812                    |
| HDL-cholesterol | 0.027              | 0.007             | 0.184                    | 0.031              | 0.040             | 0.171                    | 0.051                  | 0.152             | 0.151                    | 0.085                  | 0.035             | 0.055                    | 0.118                        | 0.126             | 0.045                    |
| MAP             | 0.328              | 0.023             | 0.494                    | 0.411              | <0.001            | 0.478                    | 0.522                  | 0.005             | 0.457                    | 0.637                  | 0.003             | 0.802                    | 0.669                        | 0.025             | 0.786                    |

Abbreviations: SES, Socio-economic status; OCC, oral contraceptives

**Table 1C:** Correction models for GEE-analysis, stratified at age > 60 years

|                 | Unadjusted         |                   |                          | Adjusted for age   |                   |                          | Adjusted for age & SES |                   |                          | Adjusted for age & OCC |                   |                          | Adjusted for age & SES & OCC |                   |                          |
|-----------------|--------------------|-------------------|--------------------------|--------------------|-------------------|--------------------------|------------------------|-------------------|--------------------------|------------------------|-------------------|--------------------------|------------------------------|-------------------|--------------------------|
|                 | P <sub>group</sub> | P <sub>time</sub> | P <sub>interaction</sub> | P <sub>group</sub> | P <sub>time</sub> | P <sub>interaction</sub> | P <sub>group</sub>     | P <sub>time</sub> | P <sub>interaction</sub> | P <sub>group</sub>     | P <sub>time</sub> | P <sub>interaction</sub> | P <sub>group</sub>           | P <sub>time</sub> | P <sub>interaction</sub> |
| BMI             | 0.001              | <0.001            | 0.662                    | 0.001              | 0.116             | 0.662                    | 0.006                  | 0.087             | 0.663                    | 0.002                  | 0.011             | 0.625                    | 0.006                        | 0.009             | 0.626                    |
| HDL-cholesterol | 0.156              | 0.001             | 0.163                    | 0.155              | 0.114             | 0.191                    | 0.314                  | 0.142             | 0.201                    | 0.162                  | 0.102             | 0.358                    | 0.299                        | 0.132             | 0.384                    |
| MAP             | 0.415              | <0.001            | 0.348                    | 0.646              | <0.001            | 0.407                    | 0.649                  | <0.001            | 0.407                    | 0.667                  | <0.001            | 0.508                    | 0.678                        | <0.001            | 0.507                    |

Abbreviations: SES, Socio-economic status; OCC, oral contraceptives

# Reporting checklist for cohort study.

Based on the STROBE cohort guidelines.

## Instructions to authors

Complete this checklist by entering the page numbers from your manuscript where readers will find each of the items listed below.

Your article may not currently address all the items on the checklist. Please modify your text to include the missing information. If you are certain that an item does not apply, please write "n/a" and provide a short explanation.

Upload your completed checklist as an extra file when you submit to a journal.

In your methods section, say that you used the STROBE cohort reporting guidelines, and cite them as:

von Elm E, Altman DG, Egger M, Pocock SJ, Gøtzsche PC, Vandenbroucke JP. The Strengthening the Reporting of Observational Studies in Epidemiology (STROBE) Statement: guidelines for reporting observational studies.

|                        |     | Reporting Item                                                                                                                  | Page Number |
|------------------------|-----|---------------------------------------------------------------------------------------------------------------------------------|-------------|
| Title                  | #1a | Indicate the study's design with a commonly used term in the title or the abstract                                              | 1           |
| Abstract               | #1b | Provide in the abstract an informative and balanced summary of what was done and what was found                                 | 2           |
| Background / rationale | #2  | Explain the scientific background and rationale for the investigation being reported                                            | 4, 5        |
| Objectives             | #3  | State specific objectives, including any prespecified hypotheses                                                                | 5           |
| Study design           | #4  | Present key elements of study design early in the paper                                                                         | 5, 6        |
| Setting                | #5  | Describe the setting, locations, and relevant dates, including periods of recruitment, exposure, follow-up, and data collection | 6           |
| Eligibility criteria   | #6a | Give the eligibility criteria, and the sources and methods of selection of participants. Describe methods of follow-up.         | 5           |



|    |                  |      |                                                                   |          |
|----|------------------|------|-------------------------------------------------------------------|----------|
| 1  |                  | #6b  | For matched studies, give matching criteria and number of         | na       |
| 2  |                  |      | exposed and unexposed                                             |          |
| 3  |                  |      |                                                                   |          |
| 4  |                  |      |                                                                   |          |
| 5  | Variables        | #7   | Clearly define all outcomes, exposures, predictors, potential     | 6        |
| 6  |                  |      | confounders, and effect modifiers. Give diagnostic criteria, if   |          |
| 7  |                  |      | applicable                                                        |          |
| 8  |                  |      |                                                                   |          |
| 9  |                  |      |                                                                   |          |
| 10 | Data sources /   | #8   | For each variable of interest give sources of data and details of | 6        |
| 11 | measurement      |      | methods of assessment (measurement). Describe                     |          |
| 12 |                  |      | comparability of assessment methods if there is more than one     |          |
| 13 |                  |      | group. Give information separately for for exposed and            |          |
| 14 |                  |      | unexposed groups if applicable.                                   |          |
| 15 |                  |      |                                                                   |          |
| 16 |                  |      |                                                                   |          |
| 17 |                  |      |                                                                   |          |
| 18 | Bias             | #9   | Describe any efforts to address potential sources of bias         | 5, 6, 7  |
| 19 |                  |      |                                                                   |          |
| 20 |                  |      |                                                                   |          |
| 21 | Study size       | #10  | Explain how the study size was arrived at                         | 5        |
| 22 |                  |      |                                                                   |          |
| 23 | Quantitative     | #11  | Explain how quantitative variables were handled in the            | 5, 7     |
| 24 | variables        |      | analyses. If applicable, describe which groupings were chosen,    |          |
| 25 |                  |      | and why                                                           |          |
| 26 |                  |      |                                                                   |          |
| 27 |                  |      |                                                                   |          |
| 28 | Statistical      | #12a | Describe all statistical methods, including those used to control | 6, 7     |
| 29 | methods          |      | for confounding                                                   |          |
| 30 |                  |      |                                                                   |          |
| 31 |                  |      |                                                                   |          |
| 32 |                  | #12b | Describe any methods used to examine subgroups and                | 6, 7     |
| 33 |                  |      | interactions                                                      |          |
| 34 |                  |      |                                                                   |          |
| 35 |                  |      |                                                                   |          |
| 36 |                  | #12c | Explain how missing data were addressed                           | 6, 7     |
| 37 |                  |      |                                                                   |          |
| 38 |                  | #12d | If applicable, explain how loss to follow-up was addressed        | 6, 7     |
| 39 |                  |      |                                                                   |          |
| 40 |                  |      |                                                                   |          |
| 41 |                  | #12e | Describe any sensitivity analyses                                 | na       |
| 42 |                  |      |                                                                   |          |
| 43 | Participants     | #13a | Report numbers of individuals at each stage of study—eg           | 5        |
| 44 |                  |      | numbers potentially eligible, examined for eligibility, confirmed |          |
| 45 |                  |      | eligible, included in the study, completing follow-up, and        |          |
| 46 |                  |      | analysed. Give information separately for for exposed and         |          |
| 47 |                  |      | unexposed groups if applicable.                                   |          |
| 48 |                  |      |                                                                   |          |
| 49 |                  |      |                                                                   |          |
| 50 |                  |      |                                                                   |          |
| 51 |                  | #13b | Give reasons for non-participation at each stage                  | 5        |
| 52 |                  |      |                                                                   |          |
| 53 |                  |      |                                                                   |          |
| 54 |                  | #13c | Consider use of a flow diagram                                    | figure 1 |
| 55 |                  |      |                                                                   |          |
| 56 | Descriptive data | #14a | Give characteristics of study participants (eg demographic,       | 7, table |
| 57 |                  |      | clinical, social) and information on exposures and potential      | 1        |
| 58 |                  |      |                                                                   |          |
| 59 |                  |      |                                                                   |          |
| 60 |                  |      |                                                                   |          |

|    |                  |                                                                        |          |
|----|------------------|------------------------------------------------------------------------|----------|
| 1  |                  | confounders. Give information separately for exposed and               |          |
| 2  |                  | unexposed groups if applicable.                                        |          |
| 3  |                  |                                                                        |          |
| 4  |                  | #14b Indicate number of participants with missing data for each        | Figure 2 |
| 5  |                  | variable of interest                                                   |          |
| 6  |                  |                                                                        |          |
| 7  |                  | #14c Summarise follow-up time (eg, average and total amount)           | 6, 8, 9  |
| 8  |                  |                                                                        |          |
| 9  |                  |                                                                        |          |
| 10 | Outcome data     | #15 Report numbers of outcome events or summary measures               | 7, 8, 9  |
| 11 |                  | over time. Give information separately for exposed and                 |          |
| 12 |                  | unexposed groups if applicable.                                        |          |
| 13 |                  |                                                                        |          |
| 14 |                  |                                                                        |          |
| 15 | Main results     | #16a Give unadjusted estimates and, if applicable, confounder-         | 7, 8, 9  |
| 16 |                  | adjusted estimates and their precision (eg, 95% confidence             |          |
| 17 |                  | interval). Make clear which confounders were adjusted for and          |          |
| 18 |                  | why they were included                                                 |          |
| 19 |                  |                                                                        |          |
| 20 |                  |                                                                        |          |
| 21 |                  |                                                                        |          |
| 22 |                  | #16b Report category boundaries when continuous variables were         | 7, 8, 9  |
| 23 |                  | categorized                                                            |          |
| 24 |                  |                                                                        |          |
| 25 |                  |                                                                        |          |
| 26 |                  | #16c If relevant, consider translating estimates of relative risk into | na       |
| 27 |                  | absolute risk for a meaningful time period                             |          |
| 28 |                  |                                                                        |          |
| 29 |                  |                                                                        |          |
| 30 | Other analyses   | #17 Report other analyses done—e.g., analyses of subgroups and         | na       |
| 31 |                  | interactions, and sensitivity analyses                                 |          |
| 32 |                  |                                                                        |          |
| 33 |                  |                                                                        |          |
| 34 | Key results      | #18 Summarise key results with reference to study objectives           | 9, 10    |
| 35 |                  |                                                                        |          |
| 36 | Limitations      | #19 Discuss limitations of the study, taking into account sources of   | 11, 12   |
| 37 |                  | potential bias or imprecision. Discuss both direction and              |          |
| 38 |                  | magnitude of any potential bias.                                       |          |
| 39 |                  |                                                                        |          |
| 40 |                  |                                                                        |          |
| 41 | Interpretation   | #20 Give a cautious overall interpretation considering objectives,     | See note |
| 42 |                  | limitations, multiplicity of analyses, results from similar studies,   | 1        |
| 43 |                  | and other relevant evidence.                                           |          |
| 44 |                  |                                                                        |          |
| 45 |                  |                                                                        |          |
| 46 | Generalisability | #21 Discuss the generalisability (external validity) of the study      | See note |
| 47 |                  | results                                                                | 2        |
| 48 |                  |                                                                        |          |
| 49 |                  |                                                                        |          |
| 50 | Funding          | #22 Give the source of funding and the role of the funders for the     | 3        |
| 51 |                  | present study and, if applicable, for the original study on which      |          |
| 52 |                  | the present article is based                                           |          |
| 53 |                  |                                                                        |          |
| 54 |                  |                                                                        |          |
| 55 |                  |                                                                        |          |

## Author notes

1. 10, 11, 12, 13

1 2. 10, 11, 12, 13

2 The STROBE checklist is distributed under the terms of the Creative Commons Attribution License  
3 CC-BY. This checklist was completed on 18. May 2018 using <http://www.goodreports.org/>, a tool  
4 made by the [EQUATOR Network](#) in collaboration with [Penelope.ai](#)  
5  
6  
7  
8  
9  
10  
11  
12  
13  
14  
15  
16  
17  
18  
19  
20  
21  
22  
23  
24  
25  
26  
27  
28  
29  
30  
31  
32  
33  
34  
35  
36  
37  
38  
39  
40  
41  
42  
43  
44  
45  
46  
47  
48  
49  
50  
51  
52  
53  
54  
55  
56  
57  
58  
59  
60

For peer review only

# BMJ Open

## Association between parity and persistent weight gain at age 40-60 years: a longitudinal prospective cohort study

|                                 |                                                                                                                                                                                                                                                                                                                                                                                                                                                                                                                                                                                                                                                                                                                                                                                              |
|---------------------------------|----------------------------------------------------------------------------------------------------------------------------------------------------------------------------------------------------------------------------------------------------------------------------------------------------------------------------------------------------------------------------------------------------------------------------------------------------------------------------------------------------------------------------------------------------------------------------------------------------------------------------------------------------------------------------------------------------------------------------------------------------------------------------------------------|
| Journal:                        | <i>BMJ Open</i>                                                                                                                                                                                                                                                                                                                                                                                                                                                                                                                                                                                                                                                                                                                                                                              |
| Manuscript ID                   | bmjopen-2018-024279.R1                                                                                                                                                                                                                                                                                                                                                                                                                                                                                                                                                                                                                                                                                                                                                                       |
| Article Type:                   | Research                                                                                                                                                                                                                                                                                                                                                                                                                                                                                                                                                                                                                                                                                                                                                                                     |
| Date Submitted by the Author:   | 02-Oct-2018                                                                                                                                                                                                                                                                                                                                                                                                                                                                                                                                                                                                                                                                                                                                                                                  |
| Complete List of Authors:       | <p>Zoet, Gerbrand; Universitair Medisch Centrum Utrecht, Obstetrics &amp; Gynaecology<br/>         Paauw, Nina; Universitair Medisch Centrum Utrecht, Obstetrics &amp; Gynaecology<br/>         Groenhof, Katrien; Universitair Medisch Centrum Utrecht, Julius Center for Health Sciences and Primary Care<br/>         Franx, Arie; University Medical Center Utrecht, Obstetrics &amp; Gynaecology<br/>         Gansevoort, Ron T.; University Medical Center Groningen, Division of Nephrology<br/>         Groen, Henk; University Medical Centre Groningen, Department of Epidemiology<br/>         Van Rijn, Bas; Universitair Medisch Centrum Utrecht, Obstetrics &amp; Gynaecology<br/>         Lely, Titia; Universitair Medisch Centrum Utrecht, Obstetrics &amp; Gynaecology</p> |
| <b>Primary Subject Heading</b>: | Obstetrics and gynaecology                                                                                                                                                                                                                                                                                                                                                                                                                                                                                                                                                                                                                                                                                                                                                                   |
| Secondary Subject Heading:      | Cardiovascular medicine, Epidemiology                                                                                                                                                                                                                                                                                                                                                                                                                                                                                                                                                                                                                                                                                                                                                        |
| Keywords:                       | Pregnancy, Parity, Cardiovascular risk factors, BMI, HDL cholesterol, Hypertension < CARDIOLOGY                                                                                                                                                                                                                                                                                                                                                                                                                                                                                                                                                                                                                                                                                              |
|                                 |                                                                                                                                                                                                                                                                                                                                                                                                                                                                                                                                                                                                                                                                                                                                                                                              |

SCHOLARONE™  
Manuscripts

1  
2  
3 1 **Association between parity and persistent weight gain at age 40-60 years: a longitudinal**  
4  
5  
6 2 **prospective cohort study**

7  
8 3 **Gerbrand A. Zoet, MD<sup>a</sup>; Nina D. Paauw, MD<sup>a</sup>; T. Katrien J. Groenhof, MD<sup>b</sup>, Arie Franx, MD PhD<sup>a</sup>; Ron T.**  
9  
10 4 **Gansevoort, MD, PhD<sup>c</sup>; Henk Groen<sup>d</sup>, MD, PhD; Bas B. van Rijn, MD, PhD<sup>a,e</sup>, A.Titia Lely, MD, PhD<sup>a</sup>.**

11  
12  
13  
14  
15 6 <sup>a</sup> Wilhelmina Children's Hospital Birth Center, University Medical Center Utrecht, Lundlaan 6, 3508 AB, Utrecht, the Netherlands

16  
17 7 <sup>b</sup> Julius Center for Health Sciences and Primary Care, University Medical Center Utrecht, Heidelberglaan 100, 3584 CX, Utrecht,  
18  
19 8 the Netherlands

20  
21 9 <sup>c</sup> Division of Nephrology, Department of Internal Medicine, University Medical Center Groningen, University of Groningen,  
22  
23 10 Hanzeplein 1, 9713 GZ, Groningen, the Netherlands

24  
25 11 <sup>d</sup> Department of Epidemiology, University Medical Center Groningen, University of Groningen, Hanzeplein 1, 9713 GZ,  
26  
27 12 Groningen, the Netherlands

28  
29 13 <sup>e</sup> Academic Unit of Human Development and Health, University of Southampton, Princess Anne Hospital, Coxford Road,  
30  
31 14 Southampton SO16 5YA, United Kingdom

32  
33 16 Corresponding author at: G.A. Zoet, University Medical Center Utrecht, Room KE 02.510.2, Lundlaan 6, PO Box 85090, 3508 AB,  
34  
35 17 Utrecht, The Netherlands. Tel.: +31 88 7557526, e-mail: [gzoet@umcutrecht.nl](mailto:gzoet@umcutrecht.nl)

36  
37 18  
38  
39 19 **Short title:** Parity and persistent weight gain

40  
41 20  
42  
43 21 **Total word count:** 3080 (excluding title page, abstract, references, figures and tables)

## 23 **Abstract**

24 *Objectives:* Physiological metabolic adaptations occur in the pregnant woman. These may persist  
25 postpartum and thereby contribute to an unfavorable cardiovascular disease (CVD) risk profile in parous  
26 women. The aim of the current study is to assess time-dependent changes of cardiometabolic health in  
27 parous women compared to nulliparous women.

28 *Design and setting:* We studied data of 2459 women who participated in the PREVEND study, a  
29 population-based prospective longitudinal cohort for assessment of CVD and renal disease in the  
30 general population.

31 *Participants:* We selected women  $\geq 40$  years at the first visit, who reported no new pregnancies during  
32 the 4 follow-up visits. All women were categorized in parity groups, and stratified for age.

33 *Outcome measures:* We compared BMI, high-density lipoprotein (HDL) cholesterol, blood pressure as  
34 continuous measurements and as clinical relevant CVD risk factors among parity groups over the course  
35 of six years using generalized estimating equation (GEE) models adjusted for age.

36 *Results:* The BMI was significantly higher in women para 2 or more in all age categories: per child, the  
37 BMI was  $0.6 \text{ kg/m}^2$  higher. corresponding with 1.5–2.0 kg weight gain per child. HDL cholesterol was  
38 significantly lower in women para 2 or more aged 40-49 and 50-59 years: per child, the HDL cholesterol  
39 was up to 0.09 mmol/L lower. Blood pressure did not differ among parity groups in any of the age  
40 categories.

41 *Conclusions:* Higher parity is associated with higher BMI, lower HDL cholesterol and a higher  
42 prevalence of cardiovascular risk factors, which is constant over time. These findings warrant for  
43 prospective research assessing determinants of cardiometabolic health at earlier age to understand the  
44 role of pregnancy in the development of cardiovascular disease in women.

45  
46 **Keywords:** Pregnancy; parity; cardiovascular risk factors; BMI; HDL cholesterol; hypertension.

1  
2  
3 47 **Study summary: Strengths and limitations of this study**  
4

- 5 48 • This longitudinal cohort comprised a large, well-phenotyped cohort with uniform assessment of all  
6  
7 49 measurements during a median follow-up of 6 years.  
8  
9  
10 50 • The GEE analysis which was performed, allowed us to assess differences among groups over time,  
11  
12 51 focusing on group effects.  
13  
14 52 • Since parity itself was not assessed in this cohort, we used the number of children as a proxy for the  
15  
16 53 number of childbirths.  
17  
18  
19 54 • Women para > 2 were older, less often used oral contraceptives and more often used  
20  
21 55 antihypertensive medication which might have resulted in a slightly different metabolic profile.  
22  
23 56 • Age at first delivery, inter-pregnancy interval and lactation have not been assessed in this cohort  
24  
25 57 and therefore, adjustment of the analyses for these factors was not possible.  
26  
27  
28 58

29  
30 59 **Funding:** The PREVEND study was supported by Dutch Kidney Foundation (Grant E.033), The Groningen  
31  
32 60 University Medical Center (Beleidsruimte) and Dade Behring, Ausam, Roche, Abbott and Gentian who  
33  
34 61 financed laboratory equipment and reagents for various laboratory determinations. Gerbrand Zoet is  
35  
36 62 supported by the Dutch Heart Foundation (grant number 2013T083). Titia Lely is supported by the  
37  
38 63 ZonMW Clinical Fellowship (40-000703-97-12463).  
39  
40  
41 64  
42  
43 65  
44  
45  
46  
47  
48  
49  
50  
51  
52  
53  
54  
55  
56  
57  
58  
59  
60

## 66 Introduction

67 Pregnancy is associated with major alterations to the cardiovascular system and metabolic profile.<sup>1-4</sup>

68 Increases in weight, lipid levels, blood plasma volume and cardiac output are needed to maintain a  
69 healthy, physiological pregnancy. Postpartum, this maternal adaptation reverses to its pre-pregnancy  
70 state, although several changes, (e.g. increased body weight and hypercholesterolemia) may persist for  
71 several months or longer.<sup>5</sup> Possibly, these persisting changes contribute to an increased prevalence of  
72 metabolic syndrome (MetS) and an unfavorable cardiometabolic profile in parous women.<sup>6-8</sup> The  
73 amount of gestational weight gain (GWG) affects postpartum weight retention.<sup>9</sup> At long-term follow up,  
74 excessive gestational weight gain is associated with an increased BMI, up to a 3-4 kg/m<sup>2</sup> 21 years after  
75 pregnancy.<sup>10-12</sup>

76  
77 Previous studies assessing the relation between parity and cardiometabolic health showed conflicting  
78 results and even the association between parity and obesity is questioned in some studies.<sup>13-16</sup> Long-  
79 term effects have only scarcely been investigated and most studies had a follow-up of only 1 to 3 years  
80 postpartum.<sup>17,18</sup> A recent large cross-sectional study among Hispanic women in the US demonstrated  
81 that multiparity (i.e. more than 4 or more than 6 children) was associated with obesity, low HDL  
82 cholesterol and elevated fasting glucose, also after adjustment for sociodemographic and lifestyle  
83 factors.<sup>8</sup> In addition, results from the cross-sectional Rotterdam study showed a lower HDL cholesterol  
84 and higher total cholesterol and glucose/insulin ratios with higher parity in Caucasian women at 70  
85 years of age.<sup>6</sup>

86 Studies on the development of cardiovascular risk factors over time and the quantification of this effect  
87 per childbirth are conflicting. Some studies suggested a linear association between number of children  
88 and an unfavorable cardiometabolic profile, while others stated that only multiparity is associated with  
89 an increased cardiovascular disease risk.<sup>6-8,19,20</sup>



1  
2  
3 90 Some studies even showed a 'J-shaped' association in which women with two children had the lowest  
4  
5 91 prevalence of coronary heart disease.<sup>6-8</sup>  
6  
7 92 The aim of the current study was to assess time-dependent changes of cardiometabolic health in parous  
8  
9 93 women, stratified for number of children, as compared with nulliparous controls. This study was  
10  
11 94 performed in a well-defined longitudinal prospective cohort study that primarily assessed development  
12  
13 95 of CVD, albuminuria and renal disease.<sup>21</sup>  
14  
15  
16  
17  
18

## 19 97 **Methods**

### 20 21 98 **Participants**

22  
23 99 The Prevention of Renal and Vascular End-stage Disease (PREVEND) study is a longitudinal cohort follow-  
24  
25 100 up study for assessment of cardiovascular and renal disease in the general population. Details of this  
26  
27 101 study have previously been published elsewhere.<sup>22,23</sup> In summary, all inhabitants of the city of  
28  
29 102 Groningen, the Netherlands, from 1997 to 1998 at age 28–75 years (n = 85,421) were invited to  
30  
31 103 participate. All that applied, filled out a questionnaire and collected a first-morning void urine sample.  
32  
33 104 Pregnant women and subjects with type 1 diabetes mellitus were excluded. The urinary albumin  
34  
35 105 concentration was assessed in a total of 40,856 (47.8%) responders. A total of 6,000 participants were  
36  
37 106 enrolled out of 7,768 subjects with a urinary albumin concentration  $\geq 10\text{mg/L}$ . In addition, 2,592  
38  
39 107 participants were enrolled out of 3,394 subjects with a urinary albumin concentration  $< 10\text{mg/L}$ .  
40  
41 108 Thereby, the PREVEND study was enriched by subjects with an elevated albumin excretion.  
42  
43  
44 109 In total, 4,301 women were enrolled in the PREVEND study (**Figure 1**). For the current analysis, only  
45  
46 110 women aged 40 years or older at the first visit and who reported no new pregnancies during the follow-  
47  
48 111 up visits were included. Women who reported no children were categorized as nulliparous (n = 464;  
49  
50 112 18.9%). Women who reported one child, two children or more than two children, were categorized as  
51  
52 113 para 1 (n = 277; 11.3%), para 2 (n = 1021; 41.5%) and para > 2 (n = 697; 28.3%). The PREVEND study has  
53  
54  
55  
56  
57  
58  
59  
60

1  
2  
3 114 been approved by the medical ethics committee of the University Medical Centre Groningen. Written  
4  
5 115 informed consent was obtained from all participants.  
6  
7  
8 116

9

### 10 117 **Patient and Public Involvement**

11  
12 118 No participants were involved with setting out the research question, developing the outcome measures  
13  
14 119 or planning the study design. The results of study results will be disseminated by the newsletter and the  
15  
16 120 study website.  
17  
18

19

### 20 21 22 **Measurements and visits**

23 123 Between 1997 and 2012, the screening visits took place every 2-4 years. Participants completed  
24  
25 124 questionnaires and underwent physical examinations. Blood samples and 24-hour urine samples were  
26  
27 125 taken. The questionnaires included questions regarding parity. Participants reported their number of  
28  
29 126 children, which was used as a proxy for the number of childbirths. In addition, education level, current  
30  
31 127 alcohol use and current smoking were assessed in these questionnaires. Details of clinical and laboratory  
32  
33 128 measurements have previously been described elsewhere.<sup>22</sup> Prescription data from pharmacies was  
34  
35 129 used to assess the use of antihypertensive and lipid lowering medication. Hypertension was defined as a  
36  
37 130 systolic blood pressure  $\geq 140$  mmHg and/or a diastolic blood pressure  $\geq 90$  mmHg or the use of blood  
38  
39 131 pressure lowering medication. Type 2 diabetes mellitus (T2DM) was defined as a fasting plasma glucose  
40  
41 132  $\geq 7.0$  mmol/L, random sample plasma glucose  $\geq 11.1$  mmol/L, self-reported physician diagnosis of type 2  
42  
43 133 diabetes mellitus, and/or the use of glucose-lowering medication.<sup>24</sup> Obesity was defined as BMI  $\geq 30$   
44  
45  
46 134 kg/m<sup>2</sup>.

47  
48  
49  
50 135 Data selection for analyses was based on a fixed time interval of six years between the visits.  
51  
52 136

### 53 54 55 137 **Statistical analysis**

56

57

58

59

60

1  
2  
3 138 Data was arranged per patient per visit. Continuous variables with a normal distribution are presented  
4  
5 139 as mean  $\pm$  standard deviation (SD) and analyzed using Student *t*-test or One-Way ANOVA followed by  
6  
7 140 Tukey post-hoc analysis. Continuous variables with a skewed distribution were expressed as median  
8  
9  
10 141 with 25<sup>th</sup>–75<sup>th</sup> percentile and analyzed using Mann-Whitney U test or Kruskal Wallis. Categorical  
11  
12 142 variables were analyzed using Pearson Chi square test or Fisher's exact test, where appropriate.  
13  
14 143 For longitudinal assessment (time factor) of the outcome measures among the different parity groups  
15  
16 144 (group factor), a generalized estimating equations (GEE) analysis was performed, including the  
17  
18 145 interaction term group\*visit (interaction factor). All analyses were performed using an autoregressive  
19  
20 146 correlation matrix structure. This assumes a variable correlation between measurements depending on  
21  
22 147 the time between measurements, as was expected in the current analysis. For GEE analyses of  
23  
24 148 continuous dependent variables (BMI, HDL cholesterol and MAP), participants were further stratified in  
25  
26 149 three age categories (40 – 49 years old, 50 – 59 years old, and  $\geq$  60 years old). In addition, we performed  
27  
28 150 a stepwise correction strategy, correcting for age (model 1), age and education (model 2), age and oral  
29  
30 151 contraceptive use (model 3) and age, education and oral contraceptive use (model 4).  
31  
32 152 Data were analyzed using SPSS 22.0 (SPSS Inc. Chicago, IL, USA) and GraphPad prism 5.01 (GraphPad  
33  
34 153 Software Inc. San Diego, CA, USA). In all analyses, a p-value  $<0.05$  was considered statistically significant.  
35  
36  
37  
38  
39  
40

## 41 155 **Results**

### 42 156 **Study population**

43  
44 157 **Table 1** provides an overview of the baseline characteristics of women who were nulliparous, para 1,  
45  
46 158 para 2 and para  $> 2$  at the first PREVEND visit. The mean age was significantly higher in women who  
47  
48 159 were para  $> 2$ . The majority of all women were Caucasian. The median follow-up time was 6 years in all  
49  
50 160 groups. The cardiovascular risk profile among the parity groups differed significantly on BMI, blood  
51  
52 161 pressure, smoking and use of alcohol. Unfavorable blood glucose measurements and cholesterol profiles  
53  
54  
55  
56  
57  
58  
59  
60

1  
2  
3 162 were related to higher parity. The use of blood pressure lowering medication was higher in women who  
4  
5 163 were para > 2 compared to the other groups, but the use of glucose and lipid lowering medication did  
6  
7 164 not differ among the groups. Women who were para > 2 less often used oral contraceptives compared  
8  
9  
10 165 to women who were nulliparous, para 1 or para 2.  
11  
12 166

### 14 167 **Cardiometabolic profile in relation to parity and age**

16 168 During the 6-year study period, there was a constant, significant difference in BMI among the parity  
17  
18 169 groups at all age categories (**Figure 2A**). The BMI was higher with every increase of parity at all age  
19  
20 170 categories: per child, the BMI was 0.6kg/m<sup>2</sup> higher, equal to 1.5-2.0 kg. In women para > 2, the  
21  
22 171 BMI was 0.7–2.0 kg/m<sup>2</sup> higher compared to the other parity groups. Over time, BMI increased  
23  
24 172 significantly in all age groups ( $p_{\text{time}} < 0.001$ ), the change in BMI over time was similar among all parity  
25  
26 173 groups ( $p_{\text{interaction}} = 0.662-0.947$ ). In a stepwise correction model, correction for age alone and correction  
27  
28 174 for age and oral contraceptive use did not influence the differences in BMI among parity groups at all  
29  
30 175 age categories (**Supplemental table 1**). After correction for age, education level and oral contraceptive  
31  
32 176 use, differences among parity groups were not statistically significant anymore at age 50-59 years only.  
33  
34 177  
35  
36 178 The prevalence of obesity increased with increasing parity at entry ( $p_{\text{for trend}} < 0.001$ ) and at 6 year follow  
37  
38 179 up ( $p_{\text{for trend}} < 0.001$ ; **Figure 3**). At visit one, 15% of the nulliparous women was obese, compared to 26% of  
39  
40 180 the women para >2. After the course of six years, this was increased to 16% of the nulliparous women  
41  
42 181 compared to 30% of the para >2. The increase in prevalence over time was similar among the groups  
43  
44 182 ( $p = 0.450$ ). In a stepwise correction model, correction for age alone and correction for age and oral  
45  
46 183 contraceptive use did not influence the differences in HDL cholesterol among parity groups at all age  
47  
48 184 categories (**Supplemental table 1**). After correction for age, education level and oral contraceptive use,  
49  
50 185 differences among parity groups were not statistically significant anymore at all age groups.  
51  
52  
53  
54  
55  
56  
57  
58  
59  
60

1  
2  
3 186  
4  
5  
6 187 HDL cholesterol differed among the groups, except for participants aged  $\geq 60$  years (**Figure 2B**). The  
7  
8 188 HDL cholesterol was lower with every increase of parity, except for participants older than 60  
9  
10 189 years: per child, the HDL decreased with 0.05 mmol/L. Women para 2 and women para  $> 2$  had  
11  
12 190 significant lower HDL cholesterol at both measurements compared to nulliparous women aged 40–49  
13  
14 191 years (0.08–0.12 mmol/L) and 50–59 years (0.10–0.17 mmol/L). Over time, HDL cholesterol increased  
15  
16 192 significantly in all age groups ( $p_{\text{time}}=0.001\text{--}0.007$ ) and the change in HDL cholesterol over time was  
17  
18 193 similar among all parity groups ( $p_{\text{interaction}}=0.163\text{--}0.530$ ).

19 194 Low HDL cholesterol ( $<1.29$  mmol/L) prevalence differed among the groups at visit one ( $p_{\text{for trend}}<0.001$ )  
20  
21 195 and at follow up visit ( $p_{\text{for trend}}=0.006$ ); low HDL cholesterol was more common when parity increased  
22  
23 196 (**Figure 3**). Low HDL cholesterol prevalence inclined similar in all groups over time ( $p=0.160$ ).

24  
25  
26 197  
27  
28  
29  
30  
31 198 There were no differences among the parity groups over time in MAP at all ages, although MAP  
32  
33 199 increased in all groups at age 40–49 years and 50–59 years and decreased in all groups at age  $\geq 60$  years  
34  
35 200 (**Figure 2C**). The change in MAP over time was similar among all parity groups ( $p_{\text{interaction}}=0.348\text{--}0.815$ ).  
36  
37 201 Prevalence of hypertension increased with parity both at entry visit ( $p_{\text{for trend}}<0.001$ ) and at follow up  
38  
39 202 ( $p_{\text{for trend}}<0.001$ ). Hypertension prevalence increased similar in all groups over time by 4–10% ( $p=0.761$ ;  
40  
41 203 **Figure 3**).

42  
43 204  
44  
45  
46 205 Occurrence of T2DM did not differ among the groups at entry ( $p_{\text{for trend}}=0.094$ ), although a positive  
47  
48 206 association was found between T2DM prevalence and parity after six years ( $p_{\text{for trend}}=0.018$ ). The increase  
49  
50 207 in T2DM over time was comparable at all groups ( $p=0.336$ ). T2DM prevalence was  $< 10\%$  at all groups at  
51  
52 208 both visits (**Figure 3**).

53  
54  
55  
56 209

1  
2  
3 210 **Discussion**  
4

5 211 In this longitudinal cohort study, having 2 children or more was associated with a higher BMI in all age  
6  
7 212 categories and with a lower HDL cholesterol, but not with changes in blood pressure. A higher parity was  
8  
9 associated with higher prevalence of obesity, low HDL cholesterol and a higher prevalence of  
10 213  
11 hypertension. These associations were constant over time. As analyses were stratified and/or adjusted  
12 214  
13 for age, these results suggest a direct association of parity itself with BMI, HDL cholesterol levels and  
14 215  
15 cardiovascular risk factor prevalence. Other factors attributing to parity, i.e. socio-economic status and  
16 216  
17 oral contraceptive use, might have contributed to these differences.  
18 217  
19  
20

21 218  
22  
23 219 BMI appears to be one of the most important cardiometabolic risk factors because it has direct effect on  
24  
25 220 cardiovascular disease onset, but also due to its adverse effect on lipid profile and blood pressure<sup>25–28</sup>  
26  
27 and therefore the influence of parity on BMI is of great interest. Results from a population-based cohort  
28 221  
29 study among 4699 women suggested that weight or weight changes might be an important mediator in  
30 222  
31 the effect of parity on metabolic syndrome, thus confirming the importance of BMI in regard to  
32 223  
33 cardiometabolic health.<sup>19</sup> In our study, roughly each extra child is associated with 1.5–2.0 kg weight gain.  
34 224  
35 Similar, each extra child is associated with 0.05 mmol/L decrease in HDL cholesterol, which might be the  
36 225  
37 result of the increased BMI.  
38 226  
39

40  
41 227 Specific BMI measures, HDL cholesterol levels and MAP measures differed among the three age groups.  
42  
43 228 Because women from all different ages were seen throughout all screening visits, we expect this to be  
44  
45 229 an effect of age itself, thereby reflecting the growing influence of age on cardiometabolic health with  
46  
47 increasing age.  
48 230  
49

50 231  
51  
52 232 Parallel to these metabolic differences in continuous measurements among the groups, occurrence of  
53  
54 233 several clinical relevant cardiovascular risk factors, such as obesity and hypertension, differed among  
55  
56  
57  
58  
59

1  
2  
3 234 the groups as well. This is in line with cross-sectional studies assessing metabolic profile in relation to  
4  
5 235 the number of children.<sup>6-8,19</sup> However, some studies could not confirm the relation between parity and  
6  
7 236 metabolic health, especially after adjustment for covariates such as lifestyle.<sup>14,15,19,29</sup> In the stepwise  
8  
9 237 correction, we found no or minimal influence of age, age and education level or age and oral  
10  
11 238 contraceptive use on our results. Only after full correction for age, education level and oral  
12  
13 239 contraceptive use, the statistical significance among parity groups diminished. Consequently, our  
14  
15 240 findings should be interpreted with caution, as these factors and others, such as lifestyle changes  
16  
17 241 following childbirth, might influence cardiovascular health next to parity itself.<sup>29</sup> Moreover, lifestyle  
18  
19 242 effects of family life and the protective effect of lactation could explain the influence of parity on  
20  
21 243 cardiometabolic health.<sup>30-32</sup>  
22  
23 244  
24  
25  
26  
27  
28 245 Another possible explanation behind the mechanism of this relationship between parity and  
29  
30 246 cardiovascular risk factors could be found in the effect of disturbances by pregnancy itself that continue  
31  
32 247 to last postpartum. For example, breastfeeding is associated with a lower risk of cardiovascular risk  
33  
34 248 factors, i.e. T2DM, although the role of breastfeeding remains controversial and a recent meta-analysis  
35  
36 249 showed no significant effect of breastfeeding on postpartum weight retention.<sup>33-36</sup> Other factors  
37  
38 250 involved in the relationship between parity and cardiovascular risk factors might be found in circulation  
39  
40 251 markers. An example might be found in the ovarian peptide hormone relaxin, produced by the corpus  
41  
42 252 luteum or placental throughout pregnancy, has emerged as cardiovascular modulator involved in  
43  
44 253 vasodilatation and inducing angiogenesis.<sup>37,38</sup> Moreover, relaxin was positively associated with insulin  
45  
46 254 sensitivity and lipid profile in women with type 2 diabetes mellitus as well.<sup>39</sup>  
47  
48 255 Previous cohort studies showed a 'J-shaped' association between parity and coronary heart disease,  
49  
50 256 with lowest prevalence in women with two children, or stated that only multiparity (i.e. more than four  
51  
52 257 or five children) was associated with increased cardiovascular disease risk.<sup>6-8</sup> However, our results  
53  
54  
55  
56  
57  
58  
59  
60

1  
2  
3 258 indicate a stepwise effect of parity on cardiometabolic health and having two children or more than two  
4  
5 259 children already affects BMI, HDL cholesterol levels and cardiovascular risk factor prevalence.  
6  
7  
8 260

9  
10 261 Our paper is the first study providing detailed assessment of cardiometabolic health development over  
11  
12 262 time in relation to parity. This longitudinal study comprised a large, well-phenotyped cohort with  
13  
14 263 uniform assessment of all measurements during a median follow-up of 6 years. The GEE analysis which  
15  
16 264 was performed, allowed us to assess differences among groups over time, focusing on group effects.  
17  
18 265 However, several limitations need to be discussed. The mean age of women para > 2 was significantly  
19  
20 266 higher than women who were nulliparous, para 1 or para 2. In addition, women para > 2 less often used  
21  
22 267 oral contraceptives and more often used antihypertensive medication. This might result in a slightly  
23  
24 268 different metabolic profile although correction of the GEE-analysis for age and oral contraceptive use  
25  
26 269 did not significantly change the results. Despite extensive phenotyping, age at first delivery, inter-  
27  
28 270 pregnancy interval and lactation have not been assessed in the PREVEND study and therefore,  
29  
30 271 adjustment of the analyses for these factors was not possible. Since parity itself was not assessed in the  
31  
32 272 PREVEND, we used the number of children as a proxy for the number of childbirths. This might lead to  
33  
34 273 inaccurate estimates of parity numbers, as the possibility of surrogacy or twin pregnancies is not taken  
35  
36 274 into account. Additionally, no information was available regarding subfertility and several pregnancy  
37  
38 275 complications, which leads to a lower number of children in these women and might reflect influence  
39  
40 276 the cardiometabolic profile in later life as well. Lastly, pre-pregnancy BMI and gestational weight gain  
41  
42 277 have not been assessed in the PREVEND study either, although their role on postpartum weight  
43  
44 278 retention seemed limited in a recent publication.<sup>9,18</sup>  
45  
46  
47  
48  
49

50 279  
51  
52 280 The PREVEND study was enriched with subjects with an elevated albumin excretion, which mostly  
53  
54 281 results in an unfavorable cardiovascular risk profile compared to the general population. However,  
55  
56  
57  
58  
59  
60



1  
2  
3 282 albuminuria did not significantly differ among the groups within our analyses. Although our findings  
4  
5 283 suggest an effect of parity itself on metabolic parameters, it should be noted that causality cannot be  
6  
7 284 determined in our study. Therefore, one could argue that the relationship is reversed, e.g. women with  
8  
9  
10 285 higher BMI or lower HDL cholesterol are more fertile and therefore have more children. Prospective  
11  
12 286 research assessing pre-pregnancy determinants of cardiometabolic health are warranted to further  
13  
14 287 assess the possible causal effect of pregnancy itself.  
15

16 288

## 19 289 **Conclusion**

20  
21 290 In this longitudinal cohort study, higher parity is associated with higher BMI and lower HDL  
22  
23 291 cholesterol. This difference among parity groups is constant over time. Furthermore, higher parity is  
24  
25 292 associated with a higher prevalence of cardiovascular risk factors among the parity groups over time.  
26  
27 293 These findings warrant for prospective research assessing determinants of cardiometabolic health at  
28  
29 294 earlier age to understand the role of pregnancy in the development of cardiovascular disease in women.  
30  
31  
32  
33

34 295

## 35 296 **References**

- 36 297 1. Bartels a., O'Donoghue K. Cholesterol in pregnancy: a review of knowns and unknowns. *Obstet Med.* 2011;4(4):147-  
37 298 151. doi:10.1258/om.2011.110003.
- 38  
39 299 2. Tan EK, Tan EL. Alterations in physiology and anatomy during pregnancy. *Best Pract Res Clin Obstet Gynaecol.*  
40 300 2013;27(6):791-802. doi:10.1016/j.bpobgyn.2013.08.0011.
- 41 301 3. Jebeile H, Mijatovic J, Louie JCY, Prvan T, Brand-Miller JC. A systematic review and metaanalysis of energy intake and  
42 302 weight gain in pregnancy. *Am J Obstet Gynecol.* 2016;214(4):465-483. doi:10.1016/j.ajog.2015.12.049.
- 43 303 4. de Haas S, Ghossein-Doha C, van Kuijk SM, van Drongelen J, Spaanderman ME. Physiologic adaptation of plasma  
44 304 volume during pregnancy: a systematic review and meta-analysis. *Ultrasound Obstet Gynecol.* 2016;d(November  
45 305 2016):177-187. doi:10.1002/uog.17360.
- 46  
47 306 5. Berge L, Armesen E, Forsdahl A. Pregnancy related changes in some cardiovascular risk factors. *Acta Obstet Gynecol*  
48 307 *Scand.* 1996;75(5):439-442.
- 49  
50 308 6. Humphries KH, Westendorp ICD, Bots ML, et al. Parity and Carotid Artery Atherosclerosis in Elderly Women: The  
51 309 Rotterdam Study. *Stroke.* 2001;32:2259-2264.
- 52  
53 310 7. Lawlor D a., Emberson JR, Ebrahim S, et al. Is the association between parity and coronary heart disease due to  
54 311 biological effects of pregnancy or adverse lifestyle risk factors associated with child-rearing? Findings from the British  
55  
56  
57  
58  
59  
60

- 1  
2  
3 312 women's heart and health study and the British regional heart st. *Circulation*. 2003;107(9):1260-1264.  
4 313 doi:10.1161/01.CIR.0000053441.43495.1A.  
5  
6 314 8. Vladutiu CJ, Siega-Riz AM, Sotres-Alvarez D, et al. Parity and components of the metabolic syndrome among US  
7 315 hispanic/latina women: Results from the hispanic community health study/study of latin@s. *Circ Cardiovasc Qual*  
8 316 *Outcomes*. 2016;9(2\_suppl\_1):S62-S69. doi:10.1161/CIRCOUTCOMES.115.002464.  
9  
10 317 9. Rong K, Yu K, Han X, et al. Pre-pregnancy BMI, gestational weight gain and postpartum weight retention: a meta-  
11 318 analysis of observational studies. *Public Health Nutr*. 2015;18(12):2172-2182. doi:10.1017/S1368980014002523.  
12  
13 319 10. Amorim AR, Rössner S, Neovius M, Lourenço PM, Linné Y. Does excess pregnancy weight gain constitute a major risk  
14 320 for increasing long-term BMI? *Obesity (Silver Spring)*. 2007;15(5):1278-1286. doi:10.1038/oby.2007.149.  
15 321 11. Al Mamun a. Associations of excess weight gain during pregnancy with long-term maternal obesity, hypertension and  
16 322 diabetes: Evidence from 21 years postpartum follow-up. *Obes Rev*. 2010;11:51. doi:http://dx.doi.org/10.1111/j.1467-  
17 323 789X.2010.00763-4.x.  
18 324 12. Fraser a, Tilling K, Macdonald C, Hughes R, Sattar N. Associations of gestational weight gain with maternal body mass  
19 325 index, waist circumference, and blood pressure measured 16 y after pregnancy: the Avon Longitudinal Study of Parents  
20 326 and Children. *Am J Clin Nutr*. 2011;93(6):1-4. doi:10.3945/ajcn.110.008326.1.  
21 327 13. Steenland K, Lally C, Thun Mi. Parity and COronary Heart Disease among Women in the American Cancer Society CPS II  
22 328 Population. *Epidemiology*. 1996;7:641-643.  
23 329 14. de Kleijn MJ, van der Schouw YT, van der Graaf Y. Reproductive history and cardiovascular disease risk in  
24 330 postmenopausal women: a review of the literature. *Maturitas*. 1999;33(1):7-36.  
25 331 15. Chung E, Kim Y, Usen O. Associations Between Parity, Obesity, and Cardiovascular Risk Factors Among Middle-Aged  
26 332 Women. *J Women's Heal*. 2016;25(8):818-825. doi:10.1089/jwh.2015.5581.  
27 333 16. Robinson WR, Cheng MM, Hoggatt KJ, Stürmer T, Siega-Riz AM. Childbearing is not associated with young women's  
28 334 long-term obesity risk. *Obesity*. 2014;22(4):1126-1132. doi:10.1002/oby.20593.  
29 335 17. Schmitt NM, Nicholson WK, Schmitt J. The association of pregnancy and the development of obesity - results of a  
30 336 systematic review and meta-analysis on the natural history of postpartum weight retention. *Int J Obes (Lond)*.  
31 337 2007;31(11):1642-1651. doi:10.1038/sj.ijo.0803655.  
32 338 18. Nehring I, Schmoll S, Beyerlein A, Hauner H, Von Kries R. Gestational weight gain and long-term postpartum weight  
33 339 retention: A meta-analysis. *Am J Clin Nutr*. 2011;94(5):1225-1231. doi:10.3945/ajcn.111.015289.  
34 340 19. Cohen A, Pieper CF, Brown AJ, Bastian L a. Number of children and risk of metabolic syndrome in women. *J Womens*  
35 341 *Health (Larchmt)*. 2006;15(6):763-773. doi:10.1089/jwh.2006.15.763.  
36 342 20. Ness RB, Harris T, Cobb J, et al. Number of pregnancies and the subsequent risk of cardiovascular disease. *N Engl J*  
37 343 *Med*. 1993;328:1528-1533.  
38 344 21. Pinto-Sietsma S-J, Mulder J, Janssen WMT, Hillege HL, Zeeuw D De, De Jong PE. Smoking Is Related to Albuminuria and  
39 345 Abnormal Renal Function in Nondiabetic Persons. *Ann Intern Med*. 2000;(133):585-591.  
40 346 22. Hillege HL, Janssen WMT, Bak a a a, et al. Microalbuminuria is common, also in a nondiabetic, nonhypertensive  
41 347 population, and an independent indicator of cardiovascular risk factors and cardiovascular morbidity. *J Intern Med*.  
42 348 2001;249(6):519-526. doi:10.1046/j.1365-2796.2001.00833.x.  
43 349 23. Joosten MM, Gansevoort RT, Mukamal KJ, Harst P Van Der, Geleijnse JM, Feskens EJM. Urinary and plasma magnesium  
44 350 and risk of ischemic heart disease 1 – 3. *October*. 2013;97(13):1299-1306.  
45  
46  
47  
48  
49  
50  
51  
52  
53  
54  
55  
56  
57  
58  
59  
60

- 1  
2  
3 351 doi:10.3945/ajcn.112.054114.INTRODUCTION.
- 4 352 24. Abbasi A, Corpeleijn E, Gansevoort RT, et al. Role of HDL cholesterol and estimates of HDL particle composition in  
5 353 future development of type 2 diabetes in the general population: The PREVEND study. *J Clin Endocrinol Metab.*  
6 354 2013;98(8):1352-1359. doi:10.1210/jc.2013-1680.
- 7 355 25. Lamon-Fava S, Wilson PWF, Schaefer EJ. Impact of Body Mass Index on Coronary Heart Disease Risk Factors in Men and  
8 356 Women: The Framingham Offspring Study. *Arterioscler Thromb Vasc Biol.* 1996;16:1509-15151.
- 9 357 26. Wilson PWF, D'Agostino RB, Sullivan L, Parise H, Kannel WB. Overweight and obesity as determinants of cardiovascular  
10 358 risk: the Framingham experience. *Arch Intern Med.* 2002;162(16):1867-1872. doi:10.1001/archinte.162.16.1867.
- 11 359 27. Bogers R, Bemelmans W, Hoogenveen R, et al. Association of overweight with increased risk of coronary heart disease  
12 360 partly independent of blood pressure and cholesterol levels. *Arch Intern Med.* 2007;167(16):1720-1728.  
13 361 doi:10.1001/archinte.167.16.1720.
- 14 362 28. Mongraw-Chaffin ML, Peters S a E, Huxley RR, Woodward M. The sex-specific relationship between body mass index  
15 363 and coronary heart disease: A systematic review and meta-analysis of 95 cohorts with 1.2 million participants. *Lancet*  
16 364 *Diabetes Endocrinol.* 2015;3(6):437-449. doi:10.1002/aur.1474.Replication.
- 17 365 29. Hardy R, Lawlor D a., Black S, Wadsworth MEJ, Kuh D. Number of children and coronary heart disease risk factors in  
18 366 men and women from a British birth cohort. *BJOG An Int J Obstet Gynaecol.* 2007;114(6):721-730. doi:10.1111/j.1471-  
19 367 0528.2007.01324.x.
- 20 368 30. Gunderson EP, Jacobs DR, Chiang V, et al. Childbearing is associated with higher incidence of the metabolic syndrome  
21 369 among women of reproductive age controlling for measurements before pregnancy: the CARDIA study. *Am J Obstet*  
22 370 *Gynecol.* 2009;201(2):177.e1-177.e9. doi:10.1016/j.ajog.2009.03.031.
- 23 371 31. McClure CK, Catov JM, Ness RB, Schwarz EB. Lactation and maternal subclinical cardiovascular disease among  
24 372 premenopausal women. *Am J Obstet Gynecol.* 2012;207(1):1-15. doi:10.1016/j.ajog.2012.04.030.
- 25 373 32. Natland Fagerhaug T, Forsmo S, Jacobsen GW, Midthjell K, Andersen LF, Ivar Lund Nilsen T. A prospective population-  
26 374 based cohort study of lactation and cardiovascular disease mortality: the HUNT study. *BMC Public Health.*  
27 375 2013;13(1):1070. doi:10.1186/1471-2458-13-1070.
- 28 376 33. Baker JL, Gamborg M, Heitmann BL, Lissner L, Sørensen TI a, Rasmussen KM. Breastfeeding reduces postpartum weight  
29 377 retention. *Am J Clin Nutr.* 2008;88(6):1543-1551. doi:10.3945/ajcn.2008.26379.
- 30 378 34. Jarlenski MP, Bennett WL, Bleich SN, Barry CL, Stuart E a. Effects of breastfeeding on postpartum weight loss among  
31 379 U.S. women. *Prev Med.* 14AD;69:146-150. doi:10.1016/j.ypped.2014.09.018.Effects.
- 32 380 35. Britz SE, McDermott KC, Pierce CB, Blomquist JL, Handa VL. Changes in maternal weight 5-10 years after a first delivery.  
33 381 *Womens Health (Lond Engl).* 2012;8(5):513-519. doi:10.2217/whe.12.35.
- 34 382 36. He X, Zhu M, Hu C, et al. Breast-feeding and postpartum weight retention: a systematic review and meta-analysis.  
35 383 *Public Health Nutr.* 2015;18(18):3308-3316. doi:10.1017/S1368980015000828.
- 36 384 37. Sherwood OD. Relaxin's physiological roles and other diverse actions. *Endocr Rev.* 2004;25(2):205-234.  
37 385 doi:10.1210/er.2003-0013.
- 38 386 38. Bani D. Relaxin as a natural agent for vascular health. *Vasc Health Risk Manag.* 2008;4(3):515-524.
- 39 387 39. Szepietowska B, Gorska M, Szelachowska M. Plasma relaxin concentration is related to beta-cell function and insulin  
40 388 sensitivity in women with type 2 diabetes mellitus. *Diabetes Res Clin Pract.* 2008;79(3):2007-2009.  
41 389 doi:10.1016/j.diabres.2007.10.017.
- 42  
43  
44  
45  
46  
47  
48  
49  
50  
51  
52  
53  
54  
55  
56  
57  
58  
59  
60

1  
2  
3 3904 391 **Competing interests**5  
6  
7 392 All authors have completed the Unified Competing Interest form at [www.icmje.org/coi\\_disclosure.pdf](http://www.icmje.org/coi_disclosure.pdf)8  
9 393 (available on request from the corresponding author) and declare no support from any organization for10  
11 394 the submitted work; no relationships with companies that might have an interest in the submitted work12  
13 395 in the previous 3 years; no other relationships or activities that could appear to have influenced the14  
15 396 submitted work.16  
17  
18 39719  
20 398 **Author's contributions**21  
22 399 GAZ, NDP, KJG, RTG, HG and ATL were involved in conception and design of the study. GAZ, KJG23  
24 400 and ATL drafted the manuscript. All authors edited the manuscript; all authors read and25  
26 401 approved the final manuscript.27  
28  
29 40230  
31 403 **Data sharing statement**32  
33 404 Data sharing: patient level data and full dataset and technical appendix and statistical code are available34  
35 405 from the corresponding author ([gzoet@umcutrecht.nl](mailto:gzoet@umcutrecht.nl)). Informed consent was not obtained but the36  
37 406 presented data are anonymized and the risk of identification is low.38  
39  
40  
41 407  
42  
43  
44  
45  
46  
47  
48  
49  
50  
51  
52  
53  
54  
55  
56  
57  
58  
59  
60

1  
2  
3  
4  
5  
6  
7  
8  
9  
10  
11  
12  
13  
14  
15  
16  
17  
18  
19  
20  
21  
22  
23  
24  
25  
26  
27  
28  
29  
30  
31  
32  
33  
34  
35  
36  
37  
38  
39  
40  
41  
42  
43  
44  
45  
46  
47  
48  
49  
50  
51  
52  
53  
54  
55  
56  
57  
58  
59  
60

408 **Figure 1: Flowchart**  
409

For peer review only

410 **Table 1: at entry table PREVENT stratified for parity**

|                                          | No children<br>(N=464) ‡ | One child<br>(N=277) ‡ | Two children<br>(N=1021) ‡ | More than two<br>children<br>(N=697) ‡ | P-value |
|------------------------------------------|--------------------------|------------------------|----------------------------|----------------------------------------|---------|
| <b>General characteristics</b>           |                          |                        |                            |                                        |         |
| Age (years)                              | 52.2 (10.1)              | 52.2 (9.0)             | 52.3 (8.4)                 | 56.9 (9.6)                             | <0.001  |
| Follow-up time (years)                   | 11 (11-12)               | 11 (11-12)             | 11 (11-12)                 | 11 (11-12)                             | 0.71    |
| Caucasian (n (%))                        | 445 (96.9%)              | 264 (96.4%)            | 995 (98.0%)                | 663 (95.7%)                            | 0.04    |
| Job (n (%))                              | 315 (68.3%)              | 127 (47.4%)            | 467 (46.5%)                | 264 (38.6%)                            | <0.001  |
| <b>Cardiovascular risk profile</b>       |                          |                        |                            |                                        |         |
| BMI (kg/m <sup>2</sup> )                 | 24.6 (22.5-27.7)         | 25.3 (22.5-28.6)       | 25.8 (23.4-28.8)           | 26.9 (24.0-30.2)                       | <0.001  |
| SBP (mmHg)                               | 120 (109-138)            | 121 (110-140)          | 122 (111-138)              | 130 (115-146)                          | <0.001  |
| DBP (mmHg)                               | 71 (65-78)               | 71 (67-77)             | 71 (66-78)                 | 73 (67-79)                             | 0.004   |
| Current smoker (n (%))                   | 139 (30.0%)              | 105 (37.9%)            | 326 (31.9%)                | 195 (28.0%)                            | 0.02    |
| Alcohol use (n (%))                      | 203 (44.0%)              | 137 (49.6%)            | 503 (49.4%)                | 378 (54.5%)                            | 0.007   |
| Cardiovascular comorbidity (n (%))       | 11 (2.4%)                | 11 (4.1%)              | 24 (2.4%)                  | 24 (3.6%)                              | 0.30    |
| Renal disease requiring dialysis (n (%)) | 1 (0.2%)                 | 0 (0%)                 | 3 (0.3%)                   | 1 (0.1%)                               | 0.78    |
| <b>Laboratory results</b>                |                          |                        |                            |                                        |         |
| Glucose (mmol/L)                         | 4.6 (4.3-5.0)            | 4.7 (4.3-5.1)          | 4.7 (4.3-5.0)              | 4.8 (4.4-5.2)                          | 0.002   |
| Insulin (mmol/L)                         | 7.0 (4.9-10.7)           | 7.6 (5.1-11.5)         | 7.8 (5.6-11.2)             | 8.5 (6.0-13.4)                         | <0.001  |
| HOMA <sub>1c</sub>                       | 1.4 (1.0-2.4)            | 1.6 (1.0-2.5)          | 1.6 (1.1-2.4)              | 1.8 (1.2-3.0)                          | <0.001  |
| Total Cholesterol (mmol/L)               | 5.7 (5.0-6.4)            | 5.7 (5.1-6.5)          | 5.8 (5.0-6.7)              | 6.0 (5.3-6.7)                          | <0.001  |
| HDL Cholesterol (mmol/L)                 | 1.5 (1.2-1.8)            | 1.5 (1.2-1.8)          | 1.4 (1.2-1.7)              | 1.4 (1.2-1.7)                          | <0.001  |
| Triglycerides (mmol/L)                   | 1.0 (0.8-1.5)            | 1.1 (0.9-1.7)          | 1.1 (0.9-1.6)              | 1.2 (0.9-1.6)                          | <0.001  |
| <b>Medication use</b>                    |                          |                        |                            |                                        |         |
| Total blood pressure lowering (n (%))    | 65 (16.4%)               | 39 (16.5%)             | 140 (15.6%)                | 151 (24.4%)                            | <0.001  |
| ACEi/ARB (n (%))                         | 19 (4.7%)                | 8 (3.3%)               | 41 (4.5%)                  | 44 (7.0%)                              | 0.07    |
| Glucose lowering (n (%))                 | 7 (1.7%)                 | 2 (0.8%)               | 12 (1.3%)                  | 12 (1.9%)                              | 0.63    |
| Lipid lowering (n (%))                   | 19 (4.7%)                | 15 (6.3%)              | 32 (3.5%)                  | 37 (5.9%)                              | 0.11    |
| Oral contraceptive use (n (%))           | 79 (18.2%)               | 50 (19.5%)             | 198 (21.1%)                | 90 (14.6%)                             | 0.01    |

411 Data are presented as median (25<sup>th</sup> – 75<sup>th</sup> percentile) unless otherwise stated. BMI: body mass index; SBP: systolic blood pressure; DBP: diastolic  
412 blood pressure; ACEi/ARB: angiotensin converting enzyme inhibitor and/or angiotensin receptor blocker; HOMA<sub>1c</sub>: homeostatic model  
413 assessment index.  
414

415 ‡ Total number that participated at visit 1 of the study, not all variables were available for each participant at baseline

1  
2  
3  
4  
5  
6  
7  
8  
9  
10  
11  
12  
13  
14  
15  
16  
17  
18  
19  
20  
21  
22  
23  
24  
25  
26  
27  
28  
29  
30  
31  
32  
33  
34  
35  
36  
37  
38  
39  
40  
41  
42  
43  
44  
45  
46  
47  
48  
49  
50  
51  
52  
53  
54  
55  
56  
57  
58  
59  
60

416 **Figure 2: Development over time of BMI (A), HDL cholesterol (B) and MAP (C), stratified for parity**

417

For peer review only

1  
2  
3 **418 Figure 3: Development of CVD risk factors over time**  
4

5 419  
6

7  
8 420 Legend: Hypertension = RR  $\geq$ 140/90 mm/Hg and/or use of antihypertensive medication;

9 421 Obesity = BMI  $\geq$ 30kg/m<sup>2</sup>; Low HDL cholesterol = HDL cholesterol <1.29 mmol/L;

10 422 Diabetes = fasting plasma glucose  $\geq$ 7.0 mmol/L, self-report of a physician

11 423 diagnosis and/or use of glucose-lowering medication.

12 424  = first visit;  = follow-up visit  
13  
14  
15  
16  
17  
18  
19  
20  
21  
22  
23  
24  
25  
26  
27  
28  
29  
30  
31  
32  
33  
34  
35  
36  
37  
38  
39  
40  
41  
42  
43  
44  
45  
46  
47  
48  
49  
50  
51  
52  
53  
54  
55  
56  
57  
58  
59  
60



1  
2  
3  
4  
5  
6  
7  
8  
9  
10  
11  
12  
13  
14  
15  
16  
17  
18  
19  
20  
21  
22  
23  
24  
25  
26  
27  
28  
29  
30  
31  
32  
33  
34  
35  
36  
37  
38  
39  
40  
41  
42  
43  
44  
45  
46  
47  
48  
49  
50  
51  
52  
53  
54  
55  
56  
57  
58  
59  
60

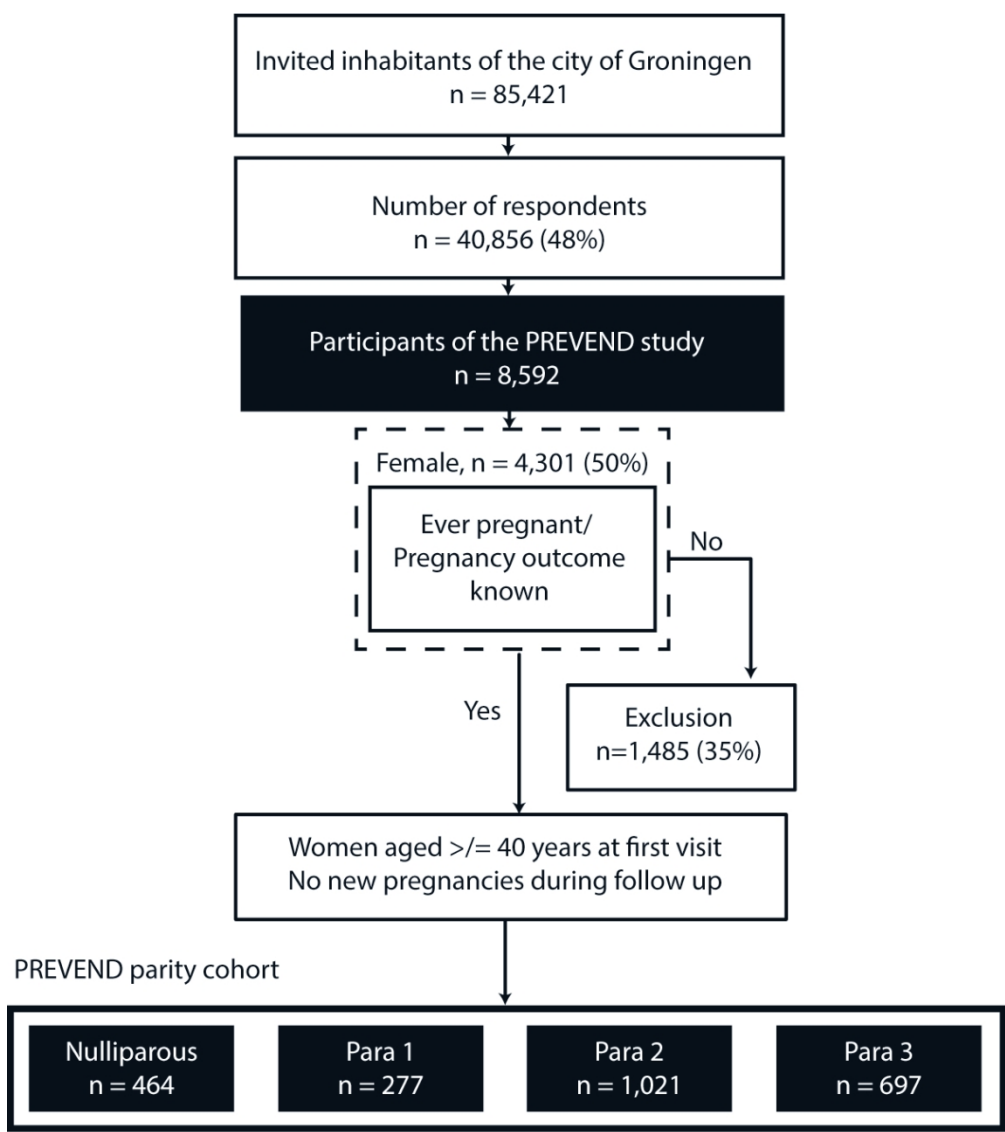

Figure 1: Flowchart

101x117mm (300 x 300 DPI)

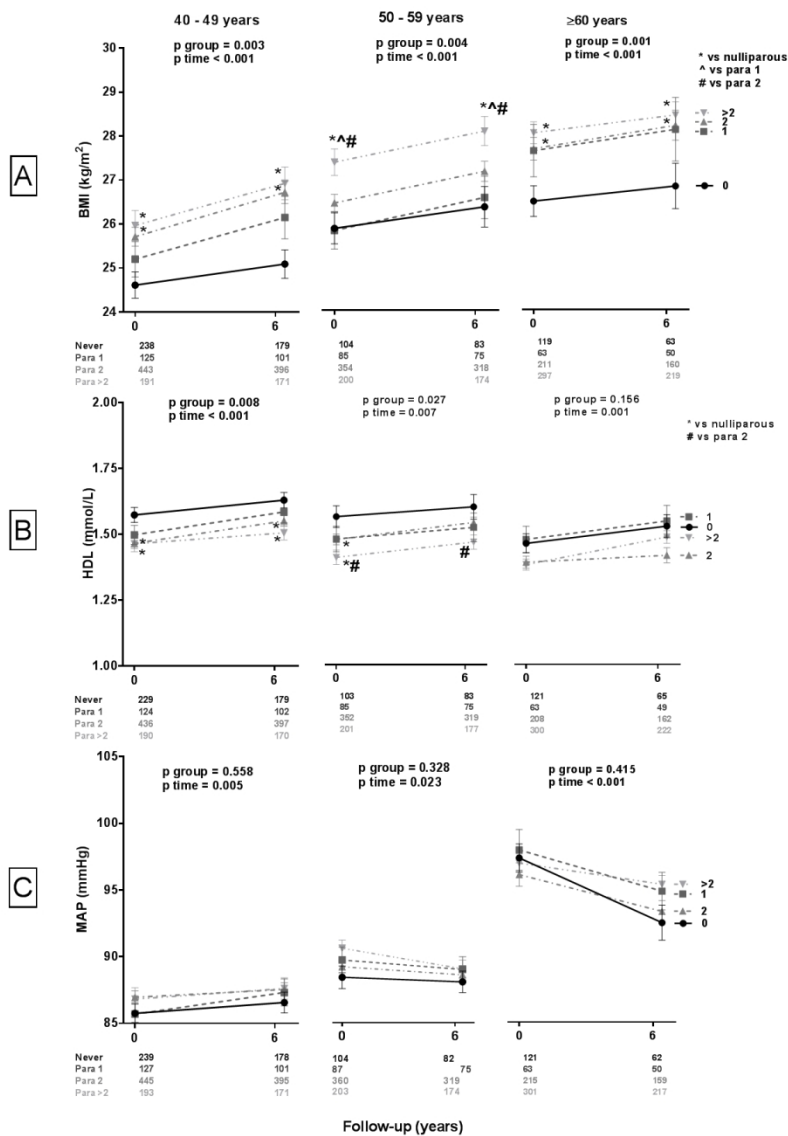

Figure 2: Development over time of BMI (A), HDL cholesterol (B) and MAP (C), stratified for parity

114x160mm (300 x 300 DPI)

1  
2  
3  
4  
5  
6  
7  
8  
9  
10  
11  
12  
13  
14  
15  
16  
17  
18  
19  
20  
21  
22  
23  
24  
25  
26  
27  
28  
29  
30  
31  
32  
33  
34  
35  
36  
37  
38  
39  
40  
41  
42  
43  
44  
45  
46  
47  
48  
49  
50  
51  
52  
53  
54  
55  
56  
57  
58  
59  
60

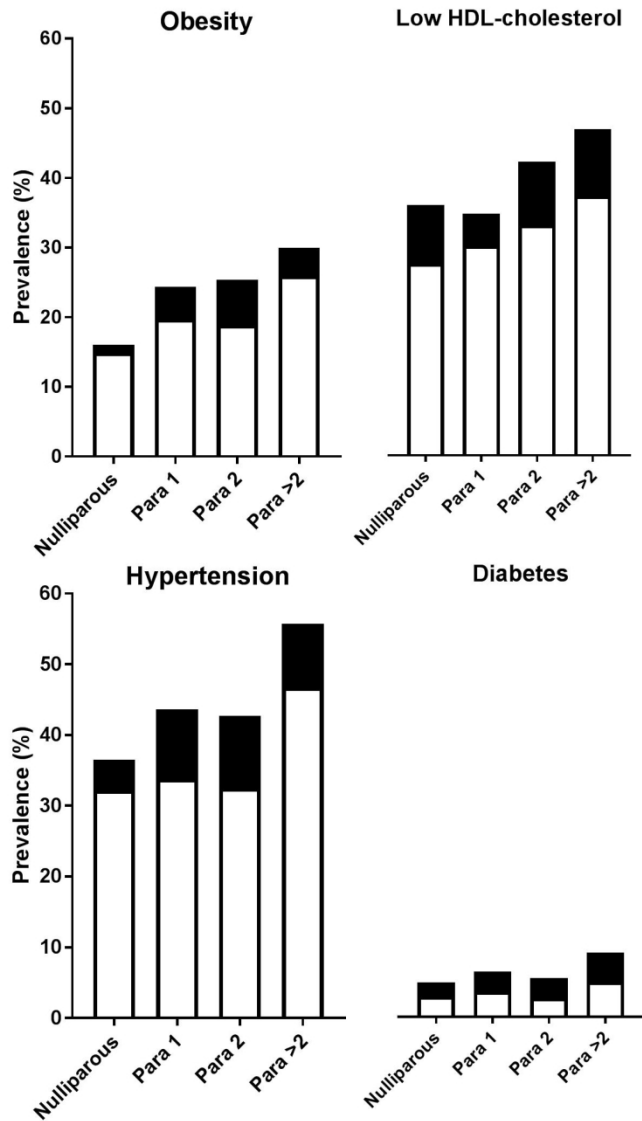

Figure 3: Development of CVD risk factors over time

111x187mm (300 x 300 DPI)

**Supplemental table 1: stepwise correction for GEE-analysis**

**Table 1A:** Correction models for GEE-analysis, stratified at age 40 – 50 years

|                 | Unadjusted         |                   |                          | Adjusted for age   |                   |                          | Adjusted for age & education |                   |                          | Adjusted for age & OCC |                   |                          | Adjusted for age & education & OCC |                   |                          |
|-----------------|--------------------|-------------------|--------------------------|--------------------|-------------------|--------------------------|------------------------------|-------------------|--------------------------|------------------------|-------------------|--------------------------|------------------------------------|-------------------|--------------------------|
|                 | P <sub>group</sub> | P <sub>time</sub> | P <sub>interaction</sub> | P <sub>group</sub> | P <sub>time</sub> | P <sub>interaction</sub> | P <sub>group</sub>           | P <sub>time</sub> | P <sub>interaction</sub> | P <sub>group</sub>     | P <sub>time</sub> | P <sub>interaction</sub> | P <sub>group</sub>                 | P <sub>time</sub> | P <sub>interaction</sub> |
| BMI             | 0.003              | <0.001            | 0.667                    | 0.011              | 0.938             | 0.694                    | 0.323                        | 0.552             | 0.685                    | 0.010                  | 0.910             | 0.627                    | 0.342                              | 0.64              | 0.628                    |
| HDL-cholesterol | 0.008              | <0.001            | 0.530                    | 0.003              | 0.737             | 0.520                    | 0.047                        | 0.472             | 0.519                    | 0.006                  | 0.666             | 0.570                    | 0.080                              | 0.438             | 0.565                    |
| MAP             | 0.558              | 0.005             | 0.815                    | 0.866              | <0.001            | 0.779                    | 0.871                        | <0.001            | 0.777                    | 0.874                  | <0.001            | 0.875                    | 0.904                              | <0.001            | 0.871                    |

Abbreviation: OCC, oral contraceptives

**Table 1B:** Correction models for GEE-analysis, stratified at age 50 – 60 years

|                 | Unadjusted         |                   |                          | Adjusted for age   |                   |                          | Adjusted for age & education |                   |                          | Adjusted for age & OCC |                   |                          | Adjusted for age & education & OCC |                   |                          |
|-----------------|--------------------|-------------------|--------------------------|--------------------|-------------------|--------------------------|------------------------------|-------------------|--------------------------|------------------------|-------------------|--------------------------|------------------------------------|-------------------|--------------------------|
|                 | P <sub>group</sub> | P <sub>time</sub> | P <sub>interaction</sub> | P <sub>group</sub> | P <sub>time</sub> | P <sub>interaction</sub> | P <sub>group</sub>           | P <sub>time</sub> | P <sub>interaction</sub> | P <sub>group</sub>     | P <sub>time</sub> | P <sub>interaction</sub> | P <sub>group</sub>                 | P <sub>time</sub> | P <sub>interaction</sub> |
| BMI             | 0.004              | <0.001            | 0.947                    | 0.006              | 0.197             | 0.945                    | 0.009                        | 0.031             | 0.920                    | 0.011                  | 0.269             | 0.849                    | 0.017                              | 0.048             | 0.812                    |
| HDL-cholesterol | 0.027              | 0.007             | 0.184                    | 0.031              | 0.040             | 0.171                    | 0.051                        | 0.152             | 0.151                    | 0.085                  | 0.035             | 0.055                    | 0.118                              | 0.126             | 0.045                    |
| MAP             | 0.328              | 0.023             | 0.494                    | 0.411              | <0.001            | 0.478                    | 0.522                        | 0.005             | 0.457                    | 0.637                  | 0.003             | 0.802                    | 0.669                              | 0.025             | 0.786                    |

Abbreviation: OCC, oral contraceptives

**Table 1C:** Correction models for GEE-analysis, stratified at age > 60 years

|                 | Unadjusted         |                   |                          | Adjusted for age   |                   |                          | Adjusted for age & education |                   |                          | Adjusted for age & OCC |                   |                          | Adjusted for age & education & OCC |                   |                          |
|-----------------|--------------------|-------------------|--------------------------|--------------------|-------------------|--------------------------|------------------------------|-------------------|--------------------------|------------------------|-------------------|--------------------------|------------------------------------|-------------------|--------------------------|
|                 | P <sub>group</sub> | P <sub>time</sub> | P <sub>interaction</sub> | P <sub>group</sub> | P <sub>time</sub> | P <sub>interaction</sub> | P <sub>group</sub>           | P <sub>time</sub> | P <sub>interaction</sub> | P <sub>group</sub>     | P <sub>time</sub> | P <sub>interaction</sub> | P <sub>group</sub>                 | P <sub>time</sub> | P <sub>interaction</sub> |
| BMI             | 0.001              | <0.001            | 0.662                    | 0.001              | 0.116             | 0.662                    | 0.006                        | 0.087             | 0.663                    | 0.002                  | 0.011             | 0.625                    | 0.006                              | 0.009             | 0.626                    |
| HDL-cholesterol | 0.156              | 0.001             | 0.163                    | 0.155              | 0.114             | 0.191                    | 0.314                        | 0.142             | 0.201                    | 0.162                  | 0.102             | 0.358                    | 0.299                              | 0.132             | 0.384                    |
| MAP             | 0.415              | <0.001            | 0.348                    | 0.646              | <0.001            | 0.407                    | 0.649                        | <0.001            | 0.407                    | 0.667                  | <0.001            | 0.508                    | 0.678                              | <0.001            | 0.507                    |

Abbreviation: OCC, oral contraceptives

# Reporting checklist for cohort study.

Based on the STROBE cohort guidelines.

## Instructions to authors

Complete this checklist by entering the page numbers from your manuscript where readers will find each of the items listed below.

Your article may not currently address all the items on the checklist. Please modify your text to include the missing information. If you are certain that an item does not apply, please write "n/a" and provide a short explanation.

Upload your completed checklist as an extra file when you submit to a journal.

In your methods section, say that you used the STROBE cohort reporting guidelines, and cite them as:

von Elm E, Altman DG, Egger M, Pocock SJ, Gotsche PC, Vandenbroucke JP. The Strengthening the Reporting of Observational Studies in Epidemiology (STROBE) Statement: guidelines for reporting observational studies.

|                        |     | Reporting Item                                                                                                                  | Page Number |
|------------------------|-----|---------------------------------------------------------------------------------------------------------------------------------|-------------|
| Title                  | #1a | Indicate the study's design with a commonly used term in the title or the abstract                                              | 1           |
| Abstract               | #1b | Provide in the abstract an informative and balanced summary of what was done and what was found                                 | 2           |
| Background / rationale | #2  | Explain the scientific background and rationale for the investigation being reported                                            | 4, 5        |
| Objectives             | #3  | State specific objectives, including any prespecified hypotheses                                                                | 5           |
| Study design           | #4  | Present key elements of study design early in the paper                                                                         | 5, 6        |
| Setting                | #5  | Describe the setting, locations, and relevant dates, including periods of recruitment, exposure, follow-up, and data collection | 6           |
| Eligibility criteria   | #6a | Give the eligibility criteria, and the sources and methods of selection of participants. Describe methods of follow-up.         | 5           |

|    |                  |      |                                                                   |          |
|----|------------------|------|-------------------------------------------------------------------|----------|
| 1  |                  | #6b  | For matched studies, give matching criteria and number of         | na       |
| 2  |                  |      | exposed and unexposed                                             |          |
| 3  |                  |      |                                                                   |          |
| 4  |                  |      |                                                                   |          |
| 5  | Variables        | #7   | Clearly define all outcomes, exposures, predictors, potential     | 6        |
| 6  |                  |      | confounders, and effect modifiers. Give diagnostic criteria, if   |          |
| 7  |                  |      | applicable                                                        |          |
| 8  |                  |      |                                                                   |          |
| 9  |                  |      |                                                                   |          |
| 10 | Data sources /   | #8   | For each variable of interest give sources of data and details of | 6        |
| 11 | measurement      |      | methods of assessment (measurement). Describe                     |          |
| 12 |                  |      | comparability of assessment methods if there is more than one     |          |
| 13 |                  |      | group. Give information separately for for exposed and            |          |
| 14 |                  |      | unexposed groups if applicable.                                   |          |
| 15 |                  |      |                                                                   |          |
| 16 |                  |      |                                                                   |          |
| 17 |                  |      |                                                                   |          |
| 18 | Bias             | #9   | Describe any efforts to address potential sources of bias         | 5, 6, 7  |
| 19 |                  |      |                                                                   |          |
| 20 |                  |      |                                                                   |          |
| 21 | Study size       | #10  | Explain how the study size was arrived at                         | 5        |
| 22 |                  |      |                                                                   |          |
| 23 | Quantitative     | #11  | Explain how quantitative variables were handled in the            | 5, 7     |
| 24 | variables        |      | analyses. If applicable, describe which groupings were chosen,    |          |
| 25 |                  |      | and why                                                           |          |
| 26 |                  |      |                                                                   |          |
| 27 |                  |      |                                                                   |          |
| 28 | Statistical      | #12a | Describe all statistical methods, including those used to control | 6, 7     |
| 29 | methods          |      | for confounding                                                   |          |
| 30 |                  |      |                                                                   |          |
| 31 |                  |      |                                                                   |          |
| 32 |                  | #12b | Describe any methods used to examine subgroups and                | 6, 7     |
| 33 |                  |      | interactions                                                      |          |
| 34 |                  |      |                                                                   |          |
| 35 |                  |      |                                                                   |          |
| 36 |                  | #12c | Explain how missing data were addressed                           | 6, 7     |
| 37 |                  |      |                                                                   |          |
| 38 |                  | #12d | If applicable, explain how loss to follow-up was addressed        | 6, 7     |
| 39 |                  |      |                                                                   |          |
| 40 |                  |      |                                                                   |          |
| 41 |                  | #12e | Describe any sensitivity analyses                                 | na       |
| 42 |                  |      |                                                                   |          |
| 43 | Participants     | #13a | Report numbers of individuals at each stage of study—eg           | 5        |
| 44 |                  |      | numbers potentially eligible, examined for eligibility, confirmed |          |
| 45 |                  |      | eligible, included in the study, completing follow-up, and        |          |
| 46 |                  |      | analysed. Give information separately for for exposed and         |          |
| 47 |                  |      | unexposed groups if applicable.                                   |          |
| 48 |                  |      |                                                                   |          |
| 49 |                  |      |                                                                   |          |
| 50 |                  |      |                                                                   |          |
| 51 |                  | #13b | Give reasons for non-participation at each stage                  | 5        |
| 52 |                  |      |                                                                   |          |
| 53 |                  |      |                                                                   |          |
| 54 |                  | #13c | Consider use of a flow diagram                                    | figure 1 |
| 55 |                  |      |                                                                   |          |
| 56 | Descriptive data | #14a | Give characteristics of study participants (eg demographic,       | 7, table |
| 57 |                  |      | clinical, social) and information on exposures and potential      | 1        |
| 58 |                  |      |                                                                   |          |
| 59 |                  |      |                                                                   |          |
| 60 |                  |      |                                                                   |          |

|    |                  |                                                                        |          |
|----|------------------|------------------------------------------------------------------------|----------|
| 1  |                  | confounders. Give information separately for exposed and               |          |
| 2  |                  | unexposed groups if applicable.                                        |          |
| 3  |                  |                                                                        |          |
| 4  |                  | #14b Indicate number of participants with missing data for each        | Figure 2 |
| 5  |                  | variable of interest                                                   |          |
| 6  |                  |                                                                        |          |
| 7  |                  | #14c Summarise follow-up time (eg, average and total amount)           | 6, 8, 9  |
| 8  |                  |                                                                        |          |
| 9  |                  |                                                                        |          |
| 10 | Outcome data     | #15 Report numbers of outcome events or summary measures               | 7, 8, 9  |
| 11 |                  | over time. Give information separately for exposed and                 |          |
| 12 |                  | unexposed groups if applicable.                                        |          |
| 13 |                  |                                                                        |          |
| 14 |                  |                                                                        |          |
| 15 | Main results     | #16a Give unadjusted estimates and, if applicable, confounder-         | 7, 8, 9  |
| 16 |                  | adjusted estimates and their precision (eg, 95% confidence             |          |
| 17 |                  | interval). Make clear which confounders were adjusted for and          |          |
| 18 |                  | why they were included                                                 |          |
| 19 |                  |                                                                        |          |
| 20 |                  |                                                                        |          |
| 21 |                  |                                                                        |          |
| 22 |                  | #16b Report category boundaries when continuous variables were         | 7, 8, 9  |
| 23 |                  | categorized                                                            |          |
| 24 |                  |                                                                        |          |
| 25 |                  |                                                                        |          |
| 26 |                  | #16c If relevant, consider translating estimates of relative risk into | na       |
| 27 |                  | absolute risk for a meaningful time period                             |          |
| 28 |                  |                                                                        |          |
| 29 |                  |                                                                        |          |
| 30 | Other analyses   | #17 Report other analyses done—e.g., analyses of subgroups and         | na       |
| 31 |                  | interactions, and sensitivity analyses                                 |          |
| 32 |                  |                                                                        |          |
| 33 |                  |                                                                        |          |
| 34 | Key results      | #18 Summarise key results with reference to study objectives           | 9, 10    |
| 35 |                  |                                                                        |          |
| 36 | Limitations      | #19 Discuss limitations of the study, taking into account sources of   | 11, 12   |
| 37 |                  | potential bias or imprecision. Discuss both direction and              |          |
| 38 |                  | magnitude of any potential bias.                                       |          |
| 39 |                  |                                                                        |          |
| 40 |                  |                                                                        |          |
| 41 | Interpretation   | #20 Give a cautious overall interpretation considering objectives,     | See note |
| 42 |                  | limitations, multiplicity of analyses, results from similar studies,   | 1        |
| 43 |                  | and other relevant evidence.                                           |          |
| 44 |                  |                                                                        |          |
| 45 |                  |                                                                        |          |
| 46 | Generalisability | #21 Discuss the generalisability (external validity) of the study      | See note |
| 47 |                  | results                                                                | 2        |
| 48 |                  |                                                                        |          |
| 49 |                  |                                                                        |          |
| 50 | Funding          | #22 Give the source of funding and the role of the funders for the     | 3        |
| 51 |                  | present study and, if applicable, for the original study on which      |          |
| 52 |                  | the present article is based                                           |          |
| 53 |                  |                                                                        |          |
| 54 |                  |                                                                        |          |
| 55 |                  |                                                                        |          |

## Author notes

1. 10, 11, 12, 13

1 2. 10, 11, 12, 13

2  
3 The STROBE checklist is distributed under the terms of the Creative Commons Attribution License  
4 CC-BY. This checklist was completed on 18. May 2018 using <http://www.goodreports.org/>, a tool  
5 made by the [EQUATOR Network](#) in collaboration with [Penelope.ai](#)  
6  
7  
8  
9  
10  
11  
12  
13  
14  
15  
16  
17  
18  
19  
20  
21  
22  
23  
24  
25  
26  
27  
28  
29  
30  
31  
32  
33  
34  
35  
36  
37  
38  
39  
40  
41  
42  
43  
44  
45  
46  
47  
48  
49  
50  
51  
52  
53  
54  
55  
56  
57  
58  
59  
60

For peer review only



# BMJ Open

## Association between parity and persistent weight gain at age 40-60 years: a longitudinal prospective cohort study

|                                 |                                                                                                                                                                                                                                                                                                                                                                                                                                                                                                                                                                                                                                                                                             |
|---------------------------------|---------------------------------------------------------------------------------------------------------------------------------------------------------------------------------------------------------------------------------------------------------------------------------------------------------------------------------------------------------------------------------------------------------------------------------------------------------------------------------------------------------------------------------------------------------------------------------------------------------------------------------------------------------------------------------------------|
| Journal:                        | <i>BMJ Open</i>                                                                                                                                                                                                                                                                                                                                                                                                                                                                                                                                                                                                                                                                             |
| Manuscript ID                   | bmjopen-2018-024279.R2                                                                                                                                                                                                                                                                                                                                                                                                                                                                                                                                                                                                                                                                      |
| Article Type:                   | Research                                                                                                                                                                                                                                                                                                                                                                                                                                                                                                                                                                                                                                                                                    |
| Date Submitted by the Author:   | 17-Feb-2019                                                                                                                                                                                                                                                                                                                                                                                                                                                                                                                                                                                                                                                                                 |
| Complete List of Authors:       | Zoet, Gerbrand; Universitair Medisch Centrum Utrecht, Obstetrics & Gynaecology<br>Paauw, Nina; Universitair Medisch Centrum Utrecht, Obstetrics & Gynaecology<br>Groenhof, Katrien; Universitair Medisch Centrum Utrecht, Julius Center for Health Sciences and Primary Care<br>Franx, Arie; University Medical Center Utrecht, Obstetrics & Gynaecology<br>Gansevoort, Ron T.; University Medical Center Groningen, Division of Nephrology<br>Groen, Henk; University Medical Centre Groningen, Department of Epidemiology<br>Van Rijn, Bas; Universitair Medisch Centrum Utrecht, Obstetrics & Gynaecology<br>Lely, Titia; Universitair Medisch Centrum Utrecht, Obstetrics & Gynaecology |
| <b>Primary Subject Heading</b>: | Obstetrics and gynaecology                                                                                                                                                                                                                                                                                                                                                                                                                                                                                                                                                                                                                                                                  |
| Secondary Subject Heading:      | Cardiovascular medicine, Epidemiology                                                                                                                                                                                                                                                                                                                                                                                                                                                                                                                                                                                                                                                       |
| Keywords:                       | Pregnancy, Parity, Cardiovascular risk factors, BMI, HDL cholesterol, Hypertension < CARDIOLOGY                                                                                                                                                                                                                                                                                                                                                                                                                                                                                                                                                                                             |
|                                 |                                                                                                                                                                                                                                                                                                                                                                                                                                                                                                                                                                                                                                                                                             |

SCHOLARONE™  
Manuscripts

1  
2  
3 1 **Association between parity and persistent weight gain at age 40-60 years: a longitudinal**  
4  
5  
6 2 **prospective cohort study**

7  
8 3 **Gerbrand A. Zoet, MD<sup>a</sup>; Nina D. Paauw, MD<sup>a</sup>; T. Katrien J. Groenhof, MD<sup>b</sup>, Arie Franx, MD PhD<sup>a</sup>; Ron T.**  
9  
10 4 **Gansevoort, MD, PhD<sup>c</sup>; Henk Groen<sup>d</sup>, MD, PhD; Bas B. van Rijn\*, MD, PhD<sup>a,e,f</sup>, A.Titia Lely\*, MD, PhD<sup>a</sup>.**

11  
12 5  
13  
14 6 \* Both authors contributed equally

15  
16 7 <sup>a</sup> Wilhelmina Children's Hospital Birth Center, University Medical Center Utrecht, Lundlaan 6, 3508 AB, Utrecht, the Netherlands

17  
18 8 <sup>b</sup> Julius Center for Health Sciences and Primary Care, University Medical Center Utrecht, Heidelberglaan 100, 3584 CX, Utrecht,  
19  
20 9 the Netherlands

21  
22 10 <sup>c</sup> Division of Nephrology, Department of Internal Medicine, University Medical Center Groningen, University of Groningen,  
23  
24 11 Hanzeplein 1, 9713 GZ, Groningen, the Netherlands

25  
26 12 <sup>d</sup> Department of Epidemiology, University Medical Center Groningen, University of Groningen, Hanzeplein 1, 9713 GZ,  
27  
28 13 Groningen, the Netherlands

29  
30 14 <sup>e</sup> Academic Unit of Human Development and Health, University of Southampton, Princess Anne Hospital, Coxford Road,  
31  
32 15 Southampton SO16 5YA, United Kingdom

33  
34 16 <sup>f</sup> Department of Obstetrics and Prenatal Medicine, Erasmus University Medical Center, Wytemaweg 80, 3015CN, Rotterdam,  
35  
36 17 the Netherlands

37  
38 18  
39 19 Corresponding author at: G.A. Zoet, University Medical Center Utrecht, Room KE 02.510.2, Lundlaan 6, PO Box 85090, 3508 AB,  
40  
41 20 Utrecht, The Netherlands. Tel.: +31 88 7557526, e-mail: [gzoet@umcutrecht.nl](mailto:gzoet@umcutrecht.nl)

42  
43 21  
44 22 **Short title:** Parity and persistent weight gain

45  
46  
47 23  
48  
49 24 **Total word count:** 3080 (excluding title page, abstract, references, figures and tables)

## 26 **Abstract**

27 *Objectives:* Physiological metabolic adaptations occur in the pregnant woman. These may persist  
28 postpartum and thereby contribute to an unfavorable cardiovascular disease (CVD) risk profile in parous  
29 women. The aim of the current study is to assess time-dependent changes of cardiometabolic health in  
30 parous women compared to nulliparous women.

31 *Design and setting:* We studied data of 2459 women who participated in the PREVEND study, a  
32 population-based prospective longitudinal cohort for assessment of CVD and renal disease in the  
33 general population.

34 *Participants:* We selected women  $\geq 40$  years at the first visit, who reported no new pregnancies during  
35 the 4 follow-up visits. All women were categorized in parity groups, and stratified for age.

36 *Outcome measures:* We compared BMI, high-density lipoprotein (HDL) cholesterol, blood pressure as  
37 continuous measurements and as clinical relevant CVD risk factors among parity groups over the course  
38 of six years using generalized estimating equation (GEE) models adjusted for age.

39 *Results:* The BMI was significantly higher in women para 2 or more in all age categories: per child, the  
40 BMI was 0.6 kg/m<sup>2</sup> higher. corresponding with 1.5–2.0 kg weight gain per child. HDL cholesterol was  
41 significantly lower in women para 2 or more aged 40-49 and 50-59 years: per child, the HDL cholesterol  
42 was up to 0.09 mmol/L lower. Blood pressure did not differ among parity groups in any of the age  
43 categories.

44 *Conclusions:* Higher parity is associated with higher BMI, lower HDL cholesterol and a higher  
45 prevalence of cardiovascular risk factors, which is constant over time. These findings warrant for  
46 prospective research assessing determinants of cardiometabolic health at earlier age to understand the  
47 role of pregnancy in the development of cardiovascular disease in women.

48  
49 **Keywords:** Pregnancy; parity; cardiovascular risk factors; BMI; HDL cholesterol; hypertension.

1  
2  
3 50 **Study summary: Strengths and limitations of this study**  
4

- 5 51 • This longitudinal cohort comprised a large, well-phenotyped cohort with uniform assessment of all  
6  
7 52 measurements during a median follow-up of 6 years.  
8  
9  
10 53 • The GEE analysis which was performed, allowed us to assess differences among groups over time,  
11  
12 54 focusing on group effects.  
13  
14 55 • Since parity itself was not assessed in this cohort, we used the number of children as a proxy for the  
15  
16 56 number of childbirths.  
17  
18  
19 57 • Women para > 2 were older, less often used oral contraceptives and more often used  
20  
21 58 antihypertensive medication which might have resulted in a slightly different metabolic profile.  
22  
23 59 • Age at first delivery, inter-pregnancy interval and lactation have not been assessed in this cohort  
24  
25 60 and therefore, adjustment of the analyses for these factors was not possible.  
26  
27  
28 61

30 62 **Funding:** The PREVEND study was supported by Dutch Kidney Foundation (Grant E.033), The Groningen  
31  
32 63 University Medical Center (Beleidsruimte) and Dade Behring, Ausam, Roche, Abbott and Gentian who  
33  
34 64 financed laboratory equipment and reagents for various laboratory determinations. Gerbrand Zoet is  
35  
36 65 supported by the Dutch Heart Foundation (grant number 2013T083). Titia Lely is supported by the  
37  
38 66 ZonMW Clinical Fellowship (40-000703-97-12463).  
39  
40

41 67  
42  
43  
44  
45  
46  
47  
48  
49  
50  
51  
52  
53  
54  
55  
56  
57  
58  
59  
60

## 69 Introduction

70 Pregnancy is associated with major alterations to the cardiovascular system and metabolic profile.<sup>1-4</sup>  
71 Increases in weight, lipid levels, blood plasma volume and cardiac output are needed to maintain a  
72 healthy, physiological pregnancy. Postpartum, this maternal adaptation reverses to its pre-pregnancy  
73 state, although several changes, (e.g. increased body weight and hypercholesterolemia) may persist for  
74 several months or longer.<sup>5</sup> Possibly, these persisting changes contribute to an increased prevalence of  
75 metabolic syndrome (MetS) and an unfavorable cardiometabolic profile in parous women.<sup>6-8</sup> The  
76 amount of gestational weight gain (GWG) affects postpartum weight retention.<sup>9</sup> At long-term follow up,  
77 excessive gestational weight gain is associated with an increased BMI, up to a 3–4 kg/m<sup>2</sup> 21 years after  
78 pregnancy.<sup>10-12</sup>

79

80 Previous studies assessing the relation between parity and cardiometabolic health showed conflicting  
81 results and even the association between parity and obesity is questioned in some studies.<sup>13-16</sup> Long-  
82 term effects have only scarcely been investigated and most studies had a follow-up of only 1 to 3 years  
83 postpartum.<sup>17,18</sup> A recent large cross-sectional study among Hispanic women in the US demonstrated  
84 that multiparity (i.e. more than 4 or more than 6 children) was associated with obesity, low HDL  
85 cholesterol and elevated fasting glucose, also after adjustment for sociodemographic and lifestyle  
86 factors.<sup>8</sup> In addition, results from the cross-sectional Rotterdam study showed a lower HDL cholesterol  
87 and higher total cholesterol and glucose/insulin ratios with higher parity in Caucasian women at 70  
88 years of age.<sup>6</sup>

89 Studies on the development of cardiovascular risk factors over time and the quantification of this effect  
90 per childbirth are conflicting. Some studies suggested a linear association between number of children  
91 and an unfavorable cardiometabolic profile, while others stated that only multiparity is associated with  
92 an increased cardiovascular disease risk.<sup>6-8,19,20</sup>

1  
2  
3 93 Some studies even showed a 'J-shaped' association in which women with two children had the lowest  
4  
5 94 prevalence of coronary heart disease.<sup>6-8</sup>  
6  
7 95 The aim of the current study was to assess time-dependent changes of cardiometabolic health in parous  
8  
9 96 women, stratified for number of children, as compared with nulliparous controls. This study was  
10  
11 97 performed in a well-defined longitudinal prospective cohort study that primarily assessed development  
12  
13 98 of CVD, albuminuria and renal disease.<sup>21</sup>  
14  
15  
16  
17 99

## 100 **Methods**

### 101 **Participants**

102 The Prevention of Renal and Vascular End-stage Disease (PREVEND) study is a longitudinal cohort follow-  
103 up study for assessment of cardiovascular and renal disease in the general population. Details of this  
104 study have previously been published elsewhere.<sup>22,23</sup> In summary, all inhabitants of the city of  
105 Groningen, the Netherlands, from 1997 to 1998 at age 28–75 years (n = 85,421) were invited to  
106 participate. All that applied, filled out a questionnaire and collected a first-morning void urine sample.  
107 Pregnant women and subjects with type 1 diabetes mellitus were excluded. The urinary albumin  
108 concentration was assessed in a total of 40,856 (47.8%) responders. A total of 6,000 participants were  
109 enrolled out of 7,768 subjects with a urinary albumin concentration  $\geq 10\text{mg/L}$ . In addition, 2,592  
110 participants were enrolled out of 3,394 subjects with a urinary albumin concentration  $< 10\text{mg/L}$ .  
111 Thereby, the PREVEND study was enriched by subjects with an elevated albumin excretion.  
112 In total, 4,301 women were enrolled in the PREVEND study (**Figure 1**). For the current analysis, only  
113 women aged 40 years or older at the first visit and who reported no new pregnancies during the follow-  
114 up visits were included. Women who reported no children were categorized as nulliparous (n = 464;  
115 18.9%). Women who reported one child, two children or more than two children, were categorized as  
116 para 1 (n = 277; 11.3%), para 2 (n = 1021; 41.5%) and para > 2 (n = 697; 28.3%). The PREVEND study has

1  
2  
3 117 been approved by the medical ethics committee of the University Medical Centre Groningen. Written  
4  
5 118 informed consent was obtained from all participants.  
6  
7  
8 119

9

## 10 120 **Patient and Public Involvement**

11  
12 121 No participants were involved with setting out the research question, developing the outcome measures  
13  
14 122 or planning the study design. The results of study results will be disseminated by the newsletter and the  
15  
16 123 study website.  
17  
18

19 124

## 20 21 125 **Measurements and visits**

22  
23 126 Between 1997 and 2012, the screening visits took place every 2-4 years. Participants completed  
24  
25 127 questionnaires and underwent physical examinations. Blood samples and 24-hour urine samples were  
26  
27 128 taken. The questionnaires included questions regarding parity. Participants reported their number of  
28  
29 129 children, which was used as a proxy for the number of childbirths. In addition, education level, current  
30  
31 130 alcohol use and current smoking were assessed in these questionnaires. Details of clinical and laboratory  
32  
33 131 measurements have previously been described elsewhere.<sup>22</sup> Prescription data from pharmacies was  
34  
35 132 used to assess the use of antihypertensive and lipid lowering medication. Hypertension was defined as a  
36  
37 133 systolic blood pressure  $\geq 140$  mmHg and/or a diastolic blood pressure  $\geq 90$  mmHg or the use of blood  
38  
39 134 pressure lowering medication. Type 2 diabetes mellitus (T2DM) was defined as a fasting plasma glucose  
40  
41 135  $\geq 7.0$  mmol/L, random sample plasma glucose  $\geq 11.1$  mmol/L, self-reported physician diagnosis of type 2  
42  
43 136 diabetes mellitus, and/or the use of glucose-lowering medication.<sup>24</sup> Obesity was defined as BMI  $\geq 30$   
44  
45 137 kg/m<sup>2</sup>.  
46  
47

48  
49  
50 138 Data selection for analyses was based on a fixed time interval of six years between the visits.  
51  
52 139

53

## 54 140 **Statistical analysis**

55

56

57

58

59

60

1  
2  
3 141 Data was arranged per patient per visit. Continuous variables with a normal distribution are presented  
4  
5 142 as mean  $\pm$  standard deviation (SD) and analyzed using Student *t*-test or One-Way ANOVA followed by  
6  
7 143 Tukey post-hoc analysis. Continuous variables with a skewed distribution were expressed as median  
8  
9  
10 144 with 25<sup>th</sup>–75<sup>th</sup> percentile and analyzed using Mann-Whitney U test or Kruskal Wallis. Categorical  
11  
12 145 variables were analyzed using Pearson Chi square test or Fisher's exact test, where appropriate.  
13  
14 146 For longitudinal assessment (time factor) of the outcome measures among the different parity groups  
15  
16 147 (group factor), a generalized estimating equations (GEE) analysis was performed, including the  
17  
18 148 interaction term group\*visit (interaction factor). All analyses were performed using an autoregressive  
19  
20 149 correlation matrix structure. This assumes a variable correlation between measurements depending on  
21  
22 150 the time between measurements, as was expected in the current analysis. For GEE analyses of  
23  
24 151 continuous dependent variables (BMI, HDL cholesterol and MAP), participants were further stratified in  
25  
26 152 three age categories (40 – 49 years old, 50 – 59 years old, and  $\geq$  60 years old). In addition, we performed  
27  
28 153 a stepwise correction strategy, correcting for age (model 1), age and education (model 2), age and oral  
29  
30 154 contraceptive use (model 3) and age, education and oral contraceptive use (model 4).  
31  
32 155 Data were analyzed using SPSS 22.0 (SPSS Inc. Chicago, IL, USA) and GraphPad prism 5.01 (GraphPad  
33  
34 156 Software Inc. San Diego, CA, USA). In all analyses, a p-value  $<0.05$  was considered statistically significant.  
35  
36  
37  
38  
39  
40

## 41 158 **Results**

### 42 159 **Study population**

43  
44 160 **Table 1** provides an overview of the baseline characteristics of women who were nulliparous, para 1,  
45  
46 161 para 2 and para  $> 2$  at the first PREVEND visit. The mean age was significantly higher in women who  
47  
48 162 were para  $> 2$ . The majority of all women were Caucasian. The median follow-up time was 6 years in all  
49  
50 163 groups. The cardiovascular risk profile among the parity groups differed significantly on BMI, blood  
51  
52 164 pressure, smoking and use of alcohol. Unfavorable blood glucose measurements and cholesterol profiles  
53  
54  
55  
56  
57  
58  
59  
60



1  
2  
3 165 were related to higher parity. The use of blood pressure lowering medication was higher in women who  
4  
5 166 were para > 2 compared to the other groups, but the use of glucose and lipid lowering medication did  
6  
7 167 not differ among the groups. Women who were para > 2 less often used oral contraceptives compared  
8  
9  
10 168 to women who were nulliparous, para 1 or para 2.

11  
12 169

### 14 170 **Cardiometabolic profile in relation to parity and age**

16 171 During the 6-year study period, there was a constant, significant difference in BMI among the parity  
17  
18 172 groups at all age categories (**Figure 2A**). The BMI was higher with every increase of parity at all age  
19  
20 173 categories: per child, the BMI was 0.6kg/m<sup>2</sup> higher, equal to 1.5-2.0 kg. In women para > 2, the  
21  
22 174 BMI was 0.7–2.0 kg/m<sup>2</sup> higher compared to the other parity groups. Over time, BMI increased  
23  
24 175 significantly in all age groups ( $p_{\text{time}} < 0.001$ ), the change in BMI over time was similar among all parity  
25  
26 176 groups ( $p_{\text{interaction}} = 0.662-0.947$ ). In a stepwise correction model, correction for age alone and correction  
27  
28 177 for age and oral contraceptive use did not influence the differences in BMI among parity groups at all  
29  
30 178 age categories (**Supplemental table 1**). After correction for age, education level and oral contraceptive  
31  
32 179 use, differences among parity groups were statistically significant at age 50-59 and >60 years only.

33  
34  
35 180

37 181 The prevalence of obesity increased with increasing parity at entry ( $p_{\text{for trend}} < 0.001$ ) and at 6 year follow  
38  
39 182 up ( $p_{\text{for trend}} < 0.001$ ; **Figure 3**). At visit one, 15% of the nulliparous women was obese, compared to 26% of  
40  
41 183 the women para >2. After the course of six years, this was increased to 16% of the nulliparous women  
42  
43 184 compared to 30% of the para >2. The increase in prevalence over time was similar among the groups  
44  
45 185 ( $p = 0.450$ ). In a stepwise correction model, correction for age alone and correction for age and oral  
46  
47 186 contraceptive use did not influence the differences in HDL cholesterol among parity groups at all age  
48  
49 187 categories (**Supplemental table 1**). After correction for age, education level and oral contraceptive use,  
50  
51 188 differences among parity groups were not statistically significant anymore at all age groups.

1  
2  
3 189  
4  
5  
6 190 HDL cholesterol differed among the groups, except for participants aged  $\geq 60$  years (**Figure 2B**). The  
7  
8 191 HDL cholesterol was lower with every increase of parity, except for participants older than 60  
9  
10 192 years: per child, the HDL decreased with 0.05 mmol/L. Women para 2 and women para  $> 2$  had  
11  
12 193 significant lower HDL cholesterol at both measurements compared to nulliparous women aged 40–49  
13  
14 194 years (0.08–0.12 mmol/L) and 50–59 years (0.10–0.17 mmol/L). Over time, HDL cholesterol increased  
15  
16 195 significantly in all age groups ( $p_{\text{time}}=0.001\text{--}0.007$ ) and the change in HDL cholesterol over time was  
17  
18 196 similar among all parity groups ( $p_{\text{interaction}}=0.163\text{--}0.530$ ).

19  
20  
21 197 Low HDL cholesterol ( $<1.29$  mmol/L) prevalence differed among the groups at visit one ( $p_{\text{for trend}}<0.001$ )  
22  
23 198 and at follow up visit ( $p_{\text{for trend}}=0.006$ ); low HDL cholesterol was more common when parity increased  
24  
25 199 (**Figure 3**). Low HDL cholesterol prevalence inclined similar in all groups over time ( $p=0.160$ ).

26  
27 200  
28  
29  
30  
31 201 There were no differences among the parity groups over time in MAP at all ages, although MAP  
32  
33 202 increased in all groups at age 40–49 years and 50–59 years and decreased in all groups at age  $\geq 60$  years  
34  
35 203 (**Figure 2C**). The change in MAP over time was similar among all parity groups ( $p_{\text{interaction}}=0.348\text{--}0.815$ ).  
36  
37 204 Prevalence of hypertension increased with parity both at entry visit ( $p_{\text{for trend}}<0.001$ ) and at follow up  
38  
39 205 ( $p_{\text{for trend}}<0.001$ ). Hypertension prevalence increased similar in all groups over time by 4–10% ( $p=0.761$ ;  
40  
41 206 **Figure 3**).

42  
43 207  
44  
45  
46 208 Occurrence of T2DM did not differ among the groups at entry ( $p_{\text{for trend}}=0.094$ ), although a positive  
47  
48 209 association was found between T2DM prevalence and parity after six years ( $p_{\text{for trend}}=0.018$ ). The increase  
49  
50 210 in T2DM over time was comparable at all groups ( $p=0.336$ ). T2DM prevalence was  $< 10\%$  at all groups at  
51  
52 211 both visits (**Figure 3**).

53  
54  
55 212

## 213 Discussion

214 In this longitudinal cohort study, having 2 children or more was associated with a higher BMI in all age  
215 categories and with a lower HDL cholesterol, but not with changes in blood pressure. A higher parity was  
216 associated with higher prevalence of obesity, low HDL cholesterol and a higher prevalence of  
217 hypertension. These associations were constant over time. As analyses were stratified and/or adjusted  
218 for age, these results suggest a direct association of parity itself with BMI, HDL cholesterol levels and  
219 cardiovascular risk factor prevalence. Other factors attributing to parity, i.e. education and oral  
220 contraceptive use, might have contributed to these differences and therefore, our results should be  
221 interpreted with caution.

222  
223 Since BMI appears to be one of the most important cardiometabolic risk factors, the influence of parity  
224 on BMI is of great interest. This strong effect of BMI is not only due to the direct effect on cardiovascular  
225 disease onset, but also due to its adverse effect on lipid profile and blood pressure.<sup>25–28</sup> Results from a  
226 population-based cohort study among 4699 women suggested that weight or weight changes might be  
227 an important mediator in the effect of parity on metabolic syndrome, thus confirming the importance of  
228 BMI in regard to cardiometabolic health.<sup>19</sup> In our study, roughly each extra child is associated with 1.5–  
229 2.0 kg weight gain. Similar, each extra child is associated with 0.05 mmol/L decrease in HDL cholesterol,  
230 which might be the result of the increased BMI.

231 Specific BMI measures, HDL cholesterol levels and MAP measures differed among the three age groups.  
232 Because women from all different ages were seen throughout all screening visits, we expect this to be  
233 an effect of age itself, thereby reflecting the growing influence of age on cardiometabolic health with  
234 increasing age.

235

1  
2  
3 236 Parallel to these metabolic differences in continuous measurements among the groups, occurrence of  
4  
5 237 several clinical relevant cardiovascular risk factors, such as obesity and hypertension, differed among  
6  
7 238 the groups as well. This is in line with cross-sectional studies assessing metabolic profile in relation to  
8  
9  
10 239 the number of children.<sup>6-8,19</sup> However, some studies could not confirm the relation between parity and  
11  
12 240 metabolic health, especially after adjustment for covariates such as lifestyle.<sup>14,15,19,29</sup> In the stepwise  
13  
14 241 correction, we found no or minimal influence of age, age and education level or age and oral  
15  
16 242 contraceptive use on our results. Only after full correction for age, education level and oral  
17  
18 243 contraceptive use, the statistical significance among parity groups diminished. Consequently, our  
19  
20  
21 244 findings should be interpreted with caution, as these factors and others, such as lifestyle changes  
22  
23 245 following childbirth, might influence cardiovascular health next to parity itself.<sup>29</sup> Moreover, lifestyle  
24  
25 246 effects of family life and the protective effect of lactation could explain the influence of parity on  
26  
27  
28 247 cardiometabolic health.<sup>30-32</sup>  
29  
30 248  
31  
32 249 Another possible explanation behind the mechanism of this relationship between parity and  
33  
34 250 cardiovascular risk factors could be found in the effect of disturbances by pregnancy itself that continue  
35  
36  
37 251 to last postpartum. For example, breastfeeding is associated with a lower risk of cardiovascular risk  
38  
39 252 factors, i.e. T2DM, although the role of breastfeeding remains controversial and a recent meta-analysis  
40  
41 253 showed no significant effect of breastfeeding on postpartum weight retention.<sup>33-36</sup> Other factors  
42  
43 254 involved in the relationship between parity and cardiovascular risk factors might be found in circulation  
44  
45  
46 255 markers. An example might be found in the ovarian peptide hormone relaxin, produced by the corpus  
47  
48 256 luteum or placental throughout pregnancy, has emerged as cardiovascular modulator involved in  
49  
50 257 vasodilatation and inducing angiogenesis.<sup>37,38</sup> Moreover, relaxin was positively associated with insulin  
51  
52 258 sensitivity and lipid profile in women with type 2 diabetes mellitus as well.<sup>39</sup>  
53  
54  
55  
56  
57  
58  
59  
60

1  
2  
3 259 Previous cohort studies showed a 'J-shaped' association between parity and coronary heart disease,  
4  
5 260 with lowest prevalence in women with two children, or stated that only multiparity (i.e. more than four  
6  
7 261 or five children) was associated with increased cardiovascular disease risk.<sup>6-8</sup> However, our results  
8  
9  
10 262 indicate a stepwise effect of parity on cardiometabolic health and having two children or more than two  
11  
12 263 children already affects BMI, HDL cholesterol levels and cardiovascular risk factor prevalence.  
13

14 264

15  
16 265 Our paper is the first study providing detailed assessment of cardiometabolic health development over  
17  
18 266 time in relation to parity. This longitudinal study comprised a large, well-phenotyped cohort with  
19  
20 267 uniform assessment of all measurements during a median follow-up of 6 years. The GEE analysis which  
21  
22 268 was performed, allowed us to assess differences among groups over time, focusing on group effects.  
23

24  
25 269 However, several limitations need to be discussed. The mean age of women para > 2 was significantly  
26  
27 270 higher than women who were nulliparous, para 1 or para 2. In addition, women para > 2 less often used  
28  
29 271 oral contraceptives and more often used antihypertensive medication. This might result in a slightly  
30  
31 272 different metabolic profile although correction of the GEE-analysis for age and oral contraceptive use  
32  
33 273 did not significantly change the results. Despite extensive phenotyping, age at first delivery, inter-  
34  
35 274 pregnancy interval and lactation have not been assessed in the PREVEND study and therefore,  
36  
37 275 adjustment of the analyses for these factors was not possible. Since parity itself was not assessed in the  
38  
39 276 PREVEND, we used the number of children as a proxy for the number of childbirths. This might lead to  
40  
41 277 inaccurate estimates of parity numbers, as the possibility of surrogacy or twin pregnancies is not taken  
42  
43 278 into account. Additionally, no information was available regarding subfertility and several pregnancy  
44  
45 279 complications, which leads to a lower number of children in these women and might reflect influence  
46  
47 280 the cardiometabolic profile in later life as well. More extensive information regarding socio-economic  
48  
49 281 status was not measured as well, thereby it was only possible to correct for education but not for other  
50  
51 282 socio-economic factors. Lastly, pre-pregnancy BMI and gestational weight gain have not been assessed  
52  
53  
54  
55  
56  
57  
58  
59  
60

1  
2  
3 283 in the PREVEND study either, although their role on postpartum weight retention seemed limited in a  
4  
5 284 recent publication.<sup>9,18</sup>  
6  
7 285  
8  
9  
10 286 The PREVEND study was enriched with subjects with an elevated albumin excretion, which mostly  
11  
12 287 results in an unfavorable cardiovascular risk profile compared to the general population. However,  
13  
14 288 albuminuria did not significantly differ among the groups within our analyses. Although our findings  
15  
16 289 suggest an effect of parity itself on metabolic parameters, it should be noted that causality cannot be  
17  
18 290 determined in our study. Therefore, one could argue that the relationship is reversed, e.g. women with  
19  
20 291 higher BMI or lower HDL cholesterol are more fertile and therefore have more children. Prospective  
21  
22 292 research assessing pre-pregnancy determinants of cardiometabolic health are warranted to further  
23  
24 293 assess the possible causal effect of pregnancy itself.  
25  
26  
27  
28  
29

### 30 295 **Conclusion**

31  
32 296 In this longitudinal cohort study, higher parity is associated with higher BMI and lower HDL  
33  
34 297 cholesterol. This difference among parity groups is constant over time. Furthermore, higher parity is  
35  
36 298 associated with a higher prevalence of cardiovascular risk factors among the parity groups over time.  
37  
38 299 These findings warrant for prospective research assessing determinants of cardiometabolic health at  
39  
40 300 earlier age to understand the role of pregnancy and the influence of lifestyle factors in the development  
41  
42 301 of cardiovascular disease in women.  
43  
44  
45

### 46 302 47 48 303 **References**

- 49 304 1. Bartels a., O'Donoghue K. Cholesterol in pregnancy: a review of knowns and unknowns. *Obstet Med.* 2011;4(4):147-  
50 305 151. doi:10.1258/om.2011.110003.  
51  
52 306 2. Tan EK, Tan EL. Alterations in physiology and anatomy during pregnancy. *Best Pract Res Clin Obstet Gynaecol.*  
53 307 2013;27(6):791-802. doi:10.1016/j.bpobgyn.2013.08.0011.  
54  
55 308 3. Jebeile H, Mijatovic J, Louie JCY, Prvan T, Brand-Miller JC. A systematic review and metaanalysis of energy intake and  
56  
57  
58  
59

- 1  
2  
3 309 weight gain in pregnancy. *Am J Obstet Gynecol*. 2016;214(4):465-483. doi:10.1016/j.ajog.2015.12.049.
- 4 310 4. de Haas S, Ghossein-Doha C, van Kuijk SM, van Drongelen J, Spaanderman ME. Physiologic adaptation of plasma  
5 311 volume during pregnancy: a systematic review and meta-analysis. *Ultrasound Obstet Gynecol*. 2016;d(November  
6 312 2016):177-187. doi:10.1002/uog.17360.
- 7 313 5. Berge L, Armesen E, Forsdahl A. Pregnancy related changes in some cardiovascular risk factors. *Acta Obstet Gynecol  
8 314 Scand*. 1996;75(5):439-442.
- 9 315 6. Humphries KH, Westendorp ICD, Bots ML, et al. Parity and Carotid Artery Atherosclerosis in Elderly Women: The  
10 316 Rotterdam Study. *Stroke*. 2001;32:2259-2264.
- 11 317 7. Lawlor D a., Emberson JR, Ebrahim S, et al. Is the association between parity and coronary heart disease due to  
12 318 biological effects of pregnancy or adverse lifestyle risk factors associated with child-rearing? Findings from the British  
13 319 women's heart and health study and the British regional heart st. *Circulation*. 2003;107(9):1260-1264.  
14 320 doi:10.1161/01.CIR.0000053441.43495.1A.
- 15 321 8. Vladutiu CJ, Siega-Riz AM, Sotres-Alvarez D, et al. Parity and components of the metabolic syndrome among US  
16 322 hispanic/latina women: Results from the hispanic community health study/study of latin@s. *Circ Cardiovasc Qual  
17 323 Outcomes*. 2016;9(2\_suppl\_1):S62-S69. doi:10.1161/CIRCOUTCOMES.115.002464.
- 18 324 9. Rong K, Yu K, Han X, et al. Pre-pregnancy BMI, gestational weight gain and postpartum weight retention: a meta-  
19 325 analysis of observational studies. *Public Health Nutr*. 2015;18(12):2172-2182. doi:10.1017/S1368980014002523.
- 20 326 10. Amorim AR, Rössner S, Neovius M, Lourenço PM, Linné Y. Does excess pregnancy weight gain constitute a major risk  
21 327 for increasing long-term BMI? *Obesity (Silver Spring)*. 2007;15(5):1278-1286. doi:10.1038/oby.2007.149.
- 22 328 11. Al Mamun a. Associations of excess weight gain during pregnancy with long-term maternal obesity, hypertension and  
23 329 diabetes: Evidence from 21 years postpartum follow-up. *Obes Rev*. 2010;11:51. doi:http://dx.doi.org/10.1111/j.1467-  
24 330 789X.2010.00763-4.x.
- 25 331 12. Fraser a, Tilling K, Macdonald C, Hughes R, Sattar N. Associations of gestational weight gain with maternal body mass  
26 332 index, waist circumference, and blood pressure measured 16 y after pregnancy: the Avon Longitudinal Study of Parents  
27 333 and Children. *Am J Clin Nutr*. 2011;93(6):1-4. doi:10.3945/ajcn.110.008326.1.
- 28 334 13. Steenland K, Lally C, Thun Mi. Parity and COronary Heart Disease among Women in the American Cancer Society CPS II  
29 335 Population. *Epidemiology*. 1996;7:641-643.
- 30 336 14. de Kleijn MJ, van der Schouw YT, van der Graaf Y. Reproductive history and cardiovascular disease risk in  
31 337 postmenopausal women: a review of the literature. *Maturitas*. 1999;33(1):7-36.
- 32 338 15. Chung E, Kim Y, Usen O. Associations Between Parity, Obesity, and Cardiovascular Risk Factors Among Middle-Aged  
33 339 Women. *J Women's Heal*. 2016;25(8):818-825. doi:10.1089/jwh.2015.5581.
- 34 340 16. Robinson WR, Cheng MM, Hoggatt KJ, Stürmer T, Siega-Riz AM. Childbearing is not associated with young women's  
35 341 long-term obesity risk. *Obesity*. 2014;22(4):1126-1132. doi:10.1002/oby.20593.
- 36 342 17. Schmitt NM, Nicholson WK, Schmitt J. The association of pregnancy and the development of obesity - results of a  
37 343 systematic review and meta-analysis on the natural history of postpartum weight retention. *Int J Obes (Lond)*.  
38 344 2007;31(11):1642-1651. doi:10.1038/sj.ijo.0803655.
- 39 345 18. Nehring I, Schmoll S, Beyerlein A, Hauner H, Von Kries R. Gestational weight gain and long-term postpartum weight  
40 346 retention: A meta-analysis. *Am J Clin Nutr*. 2011;94(5):1225-1231. doi:10.3945/ajcn.111.015289.
- 41 347 19. Cohen A, Pieper CF, Brown AJ, Bastian L a. Number of children and risk of metabolic syndrome in women. *J Womens*

- 1  
2  
3 348 *Health (Larchmt)*. 2006;15(6):763-773. doi:10.1089/jwh.2006.15.763.
- 4 349 20. Ness RB, Harris T, Cobb J, et al. Number of pregnancies and the subsequent risk of cardiovascular disease. *N Engl J*  
5 350 *Med*. 1993;328:1528-1533.
- 7 351 21. Pinto-Sietsma S-J, Mulder J, Janssen WMT, Hillege HL, Zeeuw D De, De Jong PE. Smoking Is Related to Albuminuria and  
8 352 Abnormal Renal Function in Nondiabetic Persons. *Ann Intern Med*. 2000;(133):585-591.
- 10 353 22. Hillege HL, Janssen WMT, Bak a. a. a, et al. Microalbuminuria is common, also in a nondiabetic, nonhypertensive  
11 354 population, and an independent indicator of cardiovascular risk factors and cardiovascular morbidity. *J Intern Med*.  
12 355 2001;249(6):519-526. doi:10.1046/j.1365-2796.2001.00833.x.
- 14 356 23. Joosten MM, Gansevoort RT, Mukamal KJ, Harst P Van Der, Geleijnse JM, Feskens EJM. Urinary and plasma magnesium  
15 357 and risk of ischemic heart disease 1 – 3. *October*. 2013;97(13):1299-1306.  
16 358 doi:10.3945/ajcn.112.054114.INTRODUCTION.
- 18 359 24. Abbasi A, Corpeleijn E, Gansevoort RT, et al. Role of HDL cholesterol and estimates of HDL particle composition in  
19 360 future development of type 2 diabetes in the general population: The PREVEND study. *J Clin Endocrinol Metab*.  
20 361 2013;98(8):1352-1359. doi:10.1210/jc.2013-1680.
- 22 362 25. Lamou Fava S, Wilson PWF, Schaefer EJ. Impact of Body Mass Index on Coronary Heart Disease Risk Factors in Men and  
23 363 Women: The Framingham Offspring Study. *Arterioscler Thromb Vasc Biol*. 1996;16:1509-15151.
- 25 364 26. Wilson PWF, D'Agostino RB, Sullivan L, Parise H, Kannel WB. Overweight and obesity as determinants of cardiovascular  
26 365 risk: the Framingham experience. *Arch Intern Med*. 2002;162(16):1867-1872. doi:10.1001/archinte.162.16.1867.
- 28 366 27. Bogers R, Bemelmans W, Hoogenveen R, et al. Association of overweight with increased risk of coronary heart disease  
29 367 partly independent of blood pressure and cholesterol levels. *Arch Intern Med*. 2007;167(16):1720-1728.  
30 368 doi:10.1001/archinte.167.16.1720.
- 32 369 28. Mongraw-Chaffin ML, Peters S a E, Huxley RR, Woodward M. The sex-specific relationship between body mass index  
33 370 and coronary heart disease: A systematic review and meta-analysis of 95 cohorts with 1.2 million participants. *Lancet*  
34 371 *Diabetes Endocrinol*. 2015;3(6):437-449. doi:10.1002/aur.1474.Replication.
- 36 372 29. Hardy R, Lawlor D a., Black S, Wadsworth MEJ, Kuh D. Number of children and coronary heart disease risk factors in  
37 373 men and women from a British birth cohort. *BJOG An Int J Obstet Gynaecol*. 2007;114(6):721-730. doi:10.1111/j.1471-  
38 374 0528.2007.01324.x.
- 40 375 30. Gunderson EP, Jacobs DR, Chiang V, et al. Childbearing is associated with higher incidence of the metabolic syndrome  
41 376 among women of reproductive age controlling for measurements before pregnancy: the CARDIA study. *Am J Obstet*  
42 377 *Gynecol*. 2009;201(2):177.e1-177.e9. doi:10.1016/j.ajog.2009.03.031.
- 44 378 31. McClure CK, Catov JM, Ness RB, Schwarz EB. Lactation and maternal subclinical cardiovascular disease among  
45 379 premenopausal women. *Am J Obstet Gynecol*. 2012;207(1):1-15. doi:10.1016/j.ajog.2012.04.030.
- 47 380 32. Natland Fagerhaug T, Forsmo S, Jacobsen GW, Midthjell K, Andersen LF, Ivar Lund Nilsen T. A prospective population-  
48 381 based cohort study of lactation and cardiovascular disease mortality: the HUNT study. *BMC Public Health*.  
49 382 2013;13(1):1070. doi:10.1186/1471-2458-13-1070.
- 51 383 33. Baker JL, Gamborg M, Heitmann BL, Lissner L, Sørensen TI a, Rasmussen KM. Breastfeeding reduces postpartum weight  
52 384 retention. *Am J Clin Nutr*. 2008;88(6):1543-1551. doi:10.3945/ajcn.2008.26379.
- 54 385 34. Jarlenski MP, Bennett WL, Bleich SN, Barry CL, Stuart E a. Effects of breastfeeding on postpartum weight loss among  
55 386 U.S. women. *Prev Med*. 14AD;69:146-150. doi:10.1016/j.ypped.2014.09.018.Effects.



- 1  
2  
3 387 35. Britz SE, McDermott KC, Pierce CB, Blomquist JL, Handa VL. Changes in maternal weight 5-10 years after a first delivery.  
4 388 *Womens Health (Lond Engl)*. 2012;8(5):513-519. doi:10.2217/whe.12.35.  
5  
6 389 36. He X, Zhu M, Hu C, et al. Breast-feeding and postpartum weight retention: a systematic review and meta-analysis.  
7 390 *Public Health Nutr*. 2015;18(18):3308-3316. doi:10.1017/S1368980015000828.  
8  
9 391 37. Sherwood OD. Relaxin's physiological roles and other diverse actions. *Endocr Rev*. 2004;25(2):205-234.  
10 392 doi:10.1210/er.2003-0013.  
11 393 38. Bani D. Relaxin as a natural agent for vascular health. *Vasc Health Risk Manag*. 2008;4(3):515-524.  
12 394 39. Szepietowska B, Gorska M, Szelachowska M. Plasma relaxin concentration is related to beta-cell function and insulin  
13 395 sensitivity in women with type 2 diabetes mellitus. *Diabetes Res Clin Pract*. 2008;79(3):2007-2009.  
14 396 doi:10.1016/j.diabres.2007.10.017.  
15  
16  
17 397

### 18 398 **Competing interests**

19  
20 399 All authors have completed the Unified Competing Interest form at [www.icmje.org/coi\\_disclosure.pdf](http://www.icmje.org/coi_disclosure.pdf)  
21  
22 (available on request from the corresponding author) and declare no support from any organization for  
23 400  
24 the submitted work; no relationships with companies that might have an interest in the submitted work  
25 401  
26 in the previous 3 years; no other relationships or activities that could appear to have influenced the  
27 402  
28 submitted work.  
29 403  
30  
31

### 32 404 **Author's contributions**

33  
34 405  
35 406 Gerbrand A. Zoet, Nina D. Paauw, T. Katrien J. Groenhof, Ron T. Gansevoort, Henk Groen  
36  
37 and A.Titia Lely were involved in conception and design of the study. Data analyses was performed by  
38 407  
39 Gerbrand A. Zoet, Nina D. Paauw, T. Katrien J. Groenhof and Henk Groen. Interpretation of the results  
40 408  
41 was performed by Gerbrand A. Zoet, Nina D. Paauw, T. Katrien J. Groenhof, Ron T. Gansevoort, Henk  
42 409  
43 Groen, Arie Franx, Bas B. van Rijn and A.Titia Lely. Gerbrand A. Zoet, Nina D. Paauw, T. Katrien J.  
44 410  
45 Groenhof and A.Titia Lely drafted the manuscript. Gerbrand A. Zoet, Nina D. Paauw, T. Katrien J.  
46 411  
47 Groenhof, Ron T. Gansevoort, Henk Groen, Arie Franx, Bas B. van Rijn and A.Titia Lely edited the  
48 412  
49 manuscript. All authors read and approved the final manuscript.  
50 413  
51  
52  
53  
54 414

1  
2  
3 415 **Data sharing statement**  
4

5 416 Data sharing: patient level data and full dataset and technical appendix and statistical code are available  
6  
7 417 from the corresponding author (g.zoet@umcutrecht.nl). Informed consent was not obtained but the  
8  
9 418 presented data are anonymized and the risk of identification is low.  
10  
11  
12  
13  
14  
15  
16  
17  
18  
19  
20  
21  
22  
23  
24  
25  
26  
27  
28  
29  
30  
31  
32  
33  
34  
35  
36  
37  
38  
39  
40  
41  
42  
43  
44  
45  
46  
47  
48  
49  
50  
51  
52  
53  
54  
55  
56  
57  
58  
59  
60

For peer review only

1  
2  
3 420 **Figure 1: Flowchart**

4  
5 421

6  
7  
8  
9  
10  
11  
12  
13  
14  
15  
16  
17  
18  
19  
20  
21  
22  
23  
24  
25  
26  
27  
28  
29  
30  
31  
32  
33  
34  
35  
36  
37  
38  
39  
40  
41  
42  
43  
44  
45  
46  
47  
48  
49  
50  
51  
52  
53  
54  
55  
56  
57  
58  
59  
60

For peer review only

422 **Table 1: at entry table PREVEND stratified for parity**

|                                          | No children<br>(N=464) ‡ | One child<br>(N=277) ‡ | Two children<br>(N=1021) ‡ | More than two<br>children<br>(N=697) ‡ | P-value |
|------------------------------------------|--------------------------|------------------------|----------------------------|----------------------------------------|---------|
| <b>General characteristics</b>           |                          |                        |                            |                                        |         |
| Age (years)                              | 52.2 (10.1)              | 52.2 (9.0)             | 52.3 (8.4)                 | 56.9 (9.6)                             | <0.001  |
| Follow-up time (years)                   | 11 (11-12)               | 11 (11-12)             | 11 (11-12)                 | 11 (11-12)                             | 0.71    |
| Caucasian (n (%))                        | 445 (96.9%)              | 264 (96.4%)            | 995 (98.0%)                | 663 (95.7%)                            | 0.04    |
| Job (n (%))                              | 315 (68.3%)              | 127 (47.4%)            | 467 (46.5%)                | 264 (38.6%)                            | <0.001  |
| <b>Cardiovascular risk profile</b>       |                          |                        |                            |                                        |         |
| BMI (kg/m <sup>2</sup> )                 | 24.6 (22.5-27.7)         | 25.3 (22.5-28.6)       | 25.8 (23.4-28.8)           | 26.9 (24.0-30.2)                       | <0.001  |
| SBP (mmHg)                               | 120 (109-138)            | 121 (110-140)          | 122 (111-138)              | 130 (115-146)                          | <0.001  |
| DBP (mmHg)                               | 71 (65-78)               | 71 (67-77)             | 71 (66-78)                 | 73 (67-79)                             | 0.004   |
| Current smoker (n (%))                   | 139 (30.0%)              | 105 (37.9%)            | 326 (31.9%)                | 195 (28.0%)                            | 0.02    |
| Alcohol use (n (%))                      | 203 (44.0%)              | 137 (49.6%)            | 503 (49.4%)                | 378 (54.5%)                            | 0.007   |
| Cardiovascular comorbidity (n (%))       | 11 (2.4%)                | 11 (4.1%)              | 24 (2.4%)                  | 24 (3.6%)                              | 0.30    |
| Renal disease requiring dialysis (n (%)) | 1 (0.2%)                 | 0 (0%)                 | 3 (0.3%)                   | 1 (0.1%)                               | 0.78    |
| <b>Laboratory results</b>                |                          |                        |                            |                                        |         |
| Glucose (mmol/L)                         | 4.6 (4.3-5.0)            | 4.7 (4.3-5.1)          | 4.7 (4.3-5.0)              | 4.8 (4.4-5.2)                          | 0.002   |
| Insulin (mmol/L)                         | 7.0 (4.9-10.7)           | 7.6 (5.1-11.5)         | 7.8 (5.6-11.2)             | 8.5 (6.0-13.4)                         | <0.001  |
| HOMA <sub>1c</sub>                       | 1.4 (1.0-2.4)            | 1.6 (1.0-2.5)          | 1.6 (1.1-2.4)              | 1.8 (1.2-3.0)                          | <0.001  |
| Total Cholesterol (mmol/L)               | 5.7 (5.0-6.4)            | 5.7 (5.1-6.5)          | 5.8 (5.0-6.7)              | 6.0 (5.3-6.7)                          | <0.001  |
| HDL Cholesterol (mmol/L)                 | 1.5 (1.2-1.8)            | 1.5 (1.2-1.8)          | 1.4 (1.2-1.7)              | 1.4 (1.2-1.7)                          | <0.001  |
| Triglycerides (mmol/L)                   | 1.0 (0.8-1.5)            | 1.1 (0.9-1.7)          | 1.1 (0.9-1.6)              | 1.2 (0.9-1.6)                          | <0.001  |
| <b>Medication use</b>                    |                          |                        |                            |                                        |         |
| Total blood pressure lowering (n (%))    | 65 (16.4%)               | 39 (16.5%)             | 140 (15.6%)                | 151 (24.4%)                            | <0.001  |
| ACEi/ARB (n (%))                         | 19 (4.7%)                | 8 (3.3%)               | 41 (4.5%)                  | 44 (7.0%)                              | 0.07    |
| Glucose lowering (n (%))                 | 7 (1.7%)                 | 2 (0.8%)               | 12 (1.3%)                  | 12 (1.9%)                              | 0.63    |
| Lipid lowering (n (%))                   | 19 (4.7%)                | 15 (6.3%)              | 32 (3.5%)                  | 37 (5.9%)                              | 0.11    |
| Oral contraceptive use (n (%))           | 79 (18.2%)               | 50 (19.5%)             | 198 (21.1%)                | 90 (14.6%)                             | 0.01    |

423  
424 Data are presented as median (25<sup>th</sup> – 75<sup>th</sup> percentile) unless otherwise stated. BMI: body mass index; SBP: systolic blood pressure; DBP: diastolic  
425 blood pressure; ACEi/ARB: angiotensin converting enzyme inhibitor and/or angiotensin receptor blocker; HOMA<sub>1c</sub>: homeostatic model  
426 assessment index.

427 ‡ Total number that participated at visit 1 of the study, not all variables were available for each participant at baseline

1  
2  
3  
4  
5  
6  
7  
8  
9  
10  
11  
12  
13  
14  
15  
16  
17  
18  
19  
20  
21  
22  
23  
24  
25  
26  
27  
28  
29  
30  
31  
32  
33  
34  
35  
36  
37  
38  
39  
40  
41  
42  
43  
44  
45  
46  
47  
48  
49  
50  
51  
52  
53  
54  
55  
56  
57  
58  
59  
60

428 **Figure 2: Development over time of BMI (A), HDL cholesterol (B) and MAP (C), stratified for parity**

429

For peer review only

1  
2  
3 **430 Figure 3: CVD risk factors at entry**  
4

5 431  
6

7  
8 432 Legend: Hypertension = RR  $\geq$ 140/90 mm/Hg and/or use of antihypertensive medication;

9 433 Obesity = BMI  $\geq$ 30kg/m<sup>2</sup>; Low HDL cholesterol = HDL cholesterol <1.29 mmol/L;

10 434 Diabetes = fasting plasma glucose  $\geq$ 7.0 mmol/L, self-report of a physician

11 435 diagnosis and/or use of glucose-lowering medication.

12 436  = first visit;  = follow-up visit  
13  
14  
15  
16  
17  
18  
19  
20  
21  
22  
23  
24  
25  
26  
27  
28  
29  
30  
31  
32  
33  
34  
35  
36  
37  
38  
39  
40  
41  
42  
43  
44  
45  
46  
47  
48  
49  
50  
51  
52  
53  
54  
55  
56  
57  
58  
59  
60

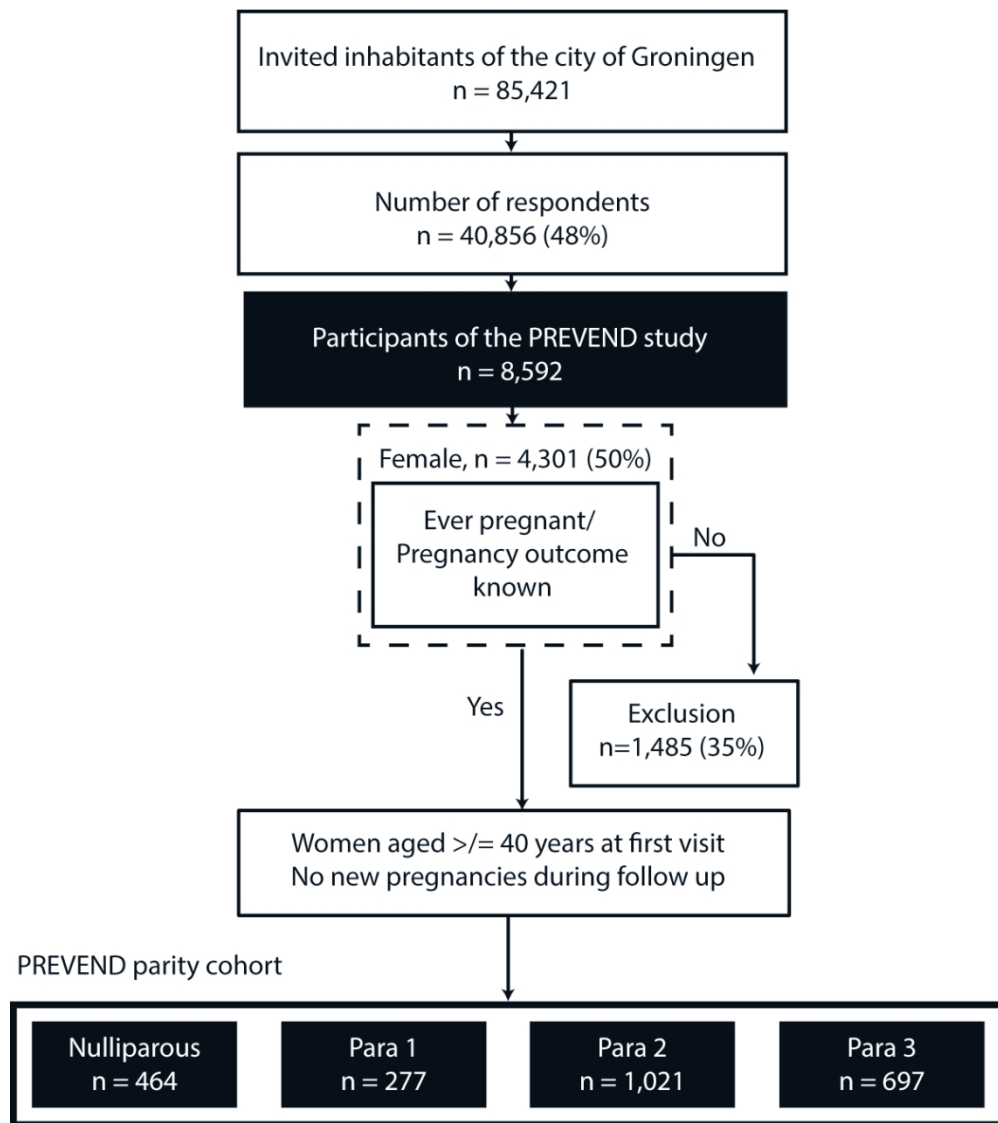

Figure 1: Flowchart

101x117mm (300 x 300 DPI)

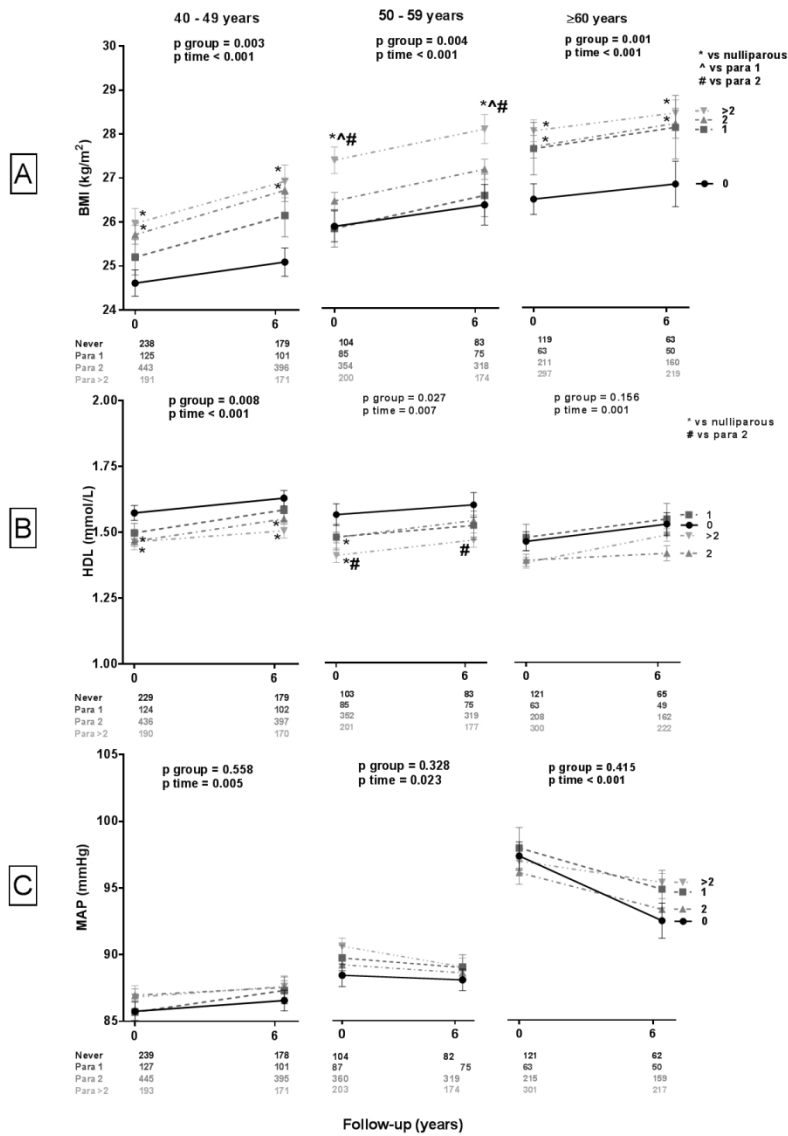

Figure 2: Development over time of BMI (A), HDL cholesterol (B) and MAP (C), stratified for parity

114x160mm (300 x 300 DPI)



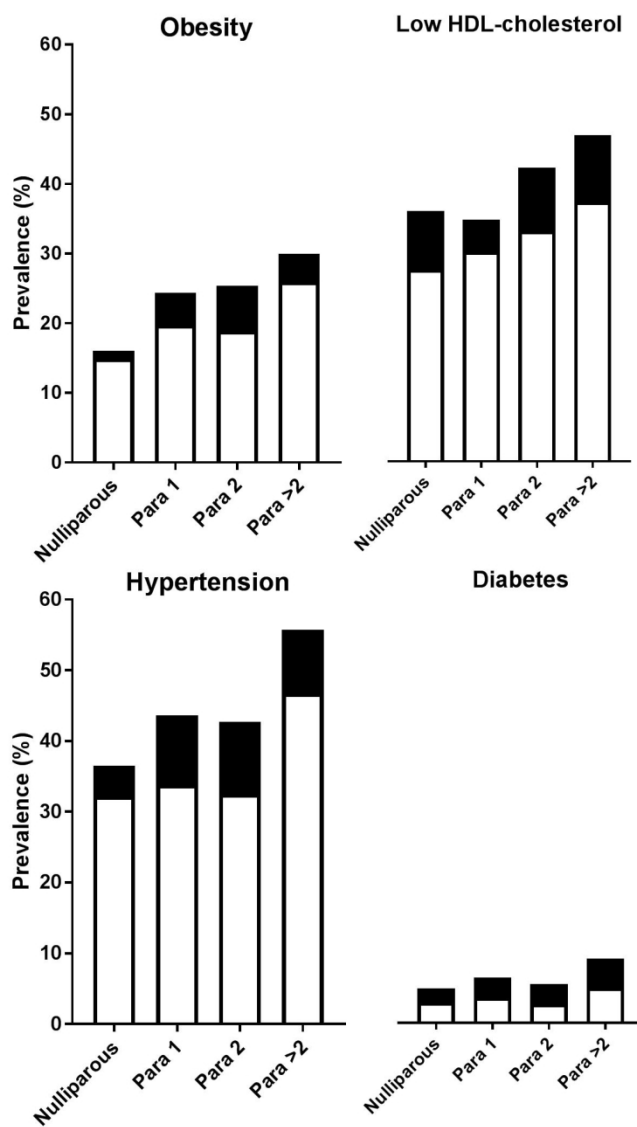

Figure 3: Development of CVD risk factors over time

111x187mm (300 x 300 DPI)

1  
2  
3  
4  
5  
6  
7  
8  
9  
10  
11  
12  
13  
14  
15  
16  
17  
18  
19  
20  
21  
22  
23  
24  
25  
26  
27  
28  
29  
30  
31  
32  
33  
34  
35  
36  
37  
38  
39  
40  
41  
42  
43  
44  
45  
46  
47

**Supplemental table 1: stepwise correction for GEE-analysis**

**Table 1A:** Correction models for GEE-analysis, stratified at age 40 – 50 years

|                 | Unadjusted         |                   |                          | Adjusted for age   |                   |                          | Adjusted for age & education |                   |                          | Adjusted for age & OCC |                   |                          | Adjusted for age & education & OCC |                   |                          |
|-----------------|--------------------|-------------------|--------------------------|--------------------|-------------------|--------------------------|------------------------------|-------------------|--------------------------|------------------------|-------------------|--------------------------|------------------------------------|-------------------|--------------------------|
|                 | P <sub>group</sub> | P <sub>time</sub> | P <sub>interaction</sub> | P <sub>group</sub> | P <sub>time</sub> | P <sub>interaction</sub> | P <sub>group</sub>           | P <sub>time</sub> | P <sub>interaction</sub> | P <sub>group</sub>     | P <sub>time</sub> | P <sub>interaction</sub> | P <sub>group</sub>                 | P <sub>time</sub> | P <sub>interaction</sub> |
| BMI             | 0.003              | <0.001            | 0.667                    | 0.011              | 0.938             | 0.694                    | 0.323                        | 0.552             | 0.685                    | 0.010                  | 0.910             | 0.627                    | 0.342                              | 0.64              | 0.628                    |
| HDL-cholesterol | 0.008              | <0.001            | 0.530                    | 0.003              | 0.737             | 0.520                    | 0.047                        | 0.472             | 0.519                    | 0.006                  | 0.666             | 0.570                    | 0.080                              | 0.438             | 0.565                    |
| MAP             | 0.558              | 0.005             | 0.815                    | 0.866              | <0.001            | 0.779                    | 0.871                        | <0.001            | 0.777                    | 0.874                  | <0.001            | 0.875                    | 0.904                              | <0.001            | 0.871                    |

Abbreviation: OCC, oral contraceptives

**Table 1B:** Correction models for GEE-analysis, stratified at age 50 – 60 years

|                 | Unadjusted         |                   |                          | Adjusted for age   |                   |                          | Adjusted for age & education |                   |                          | Adjusted for age & OCC |                   |                          | Adjusted for age & education & OCC |                   |                          |
|-----------------|--------------------|-------------------|--------------------------|--------------------|-------------------|--------------------------|------------------------------|-------------------|--------------------------|------------------------|-------------------|--------------------------|------------------------------------|-------------------|--------------------------|
|                 | P <sub>group</sub> | P <sub>time</sub> | P <sub>interaction</sub> | P <sub>group</sub> | P <sub>time</sub> | P <sub>interaction</sub> | P <sub>group</sub>           | P <sub>time</sub> | P <sub>interaction</sub> | P <sub>group</sub>     | P <sub>time</sub> | P <sub>interaction</sub> | P <sub>group</sub>                 | P <sub>time</sub> | P <sub>interaction</sub> |
| BMI             | 0.004              | <0.001            | 0.947                    | 0.006              | 0.197             | 0.945                    | 0.009                        | 0.031             | 0.920                    | 0.011                  | 0.269             | 0.849                    | 0.017                              | 0.048             | 0.812                    |
| HDL-cholesterol | 0.027              | 0.007             | 0.184                    | 0.031              | 0.040             | 0.171                    | 0.051                        | 0.152             | 0.151                    | 0.085                  | 0.035             | 0.055                    | 0.118                              | 0.126             | 0.045                    |
| MAP             | 0.328              | 0.023             | 0.494                    | 0.411              | <0.001            | 0.478                    | 0.522                        | 0.005             | 0.457                    | 0.637                  | 0.003             | 0.802                    | 0.669                              | 0.025             | 0.786                    |

Abbreviation: OCC, oral contraceptives

**Table 1C:** Correction models for GEE-analysis, stratified at age > 60 years

|                 | Unadjusted         |                   |                          | Adjusted for age   |                   |                          | Adjusted for age & education |                   |                          | Adjusted for age & OCC |                   |                          | Adjusted for age & education & OCC |                   |                          |
|-----------------|--------------------|-------------------|--------------------------|--------------------|-------------------|--------------------------|------------------------------|-------------------|--------------------------|------------------------|-------------------|--------------------------|------------------------------------|-------------------|--------------------------|
|                 | P <sub>group</sub> | P <sub>time</sub> | P <sub>interaction</sub> | P <sub>group</sub> | P <sub>time</sub> | P <sub>interaction</sub> | P <sub>group</sub>           | P <sub>time</sub> | P <sub>interaction</sub> | P <sub>group</sub>     | P <sub>time</sub> | P <sub>interaction</sub> | P <sub>group</sub>                 | P <sub>time</sub> | P <sub>interaction</sub> |
| BMI             | 0.001              | <0.001            | 0.662                    | 0.001              | 0.116             | 0.662                    | 0.006                        | 0.087             | 0.663                    | 0.002                  | 0.011             | 0.625                    | 0.006                              | 0.009             | 0.626                    |
| HDL-cholesterol | 0.156              | 0.001             | 0.163                    | 0.155              | 0.114             | 0.191                    | 0.314                        | 0.142             | 0.201                    | 0.162                  | 0.102             | 0.358                    | 0.299                              | 0.132             | 0.384                    |
| MAP             | 0.415              | <0.001            | 0.348                    | 0.646              | <0.001            | 0.407                    | 0.649                        | <0.001            | 0.407                    | 0.667                  | <0.001            | 0.508                    | 0.678                              | <0.001            | 0.507                    |

Abbreviation: OCC, oral contraceptives

# Reporting checklist for cohort study.

Based on the STROBE cohort guidelines.

## Instructions to authors

Complete this checklist by entering the page numbers from your manuscript where readers will find each of the items listed below.

Your article may not currently address all the items on the checklist. Please modify your text to include the missing information. If you are certain that an item does not apply, please write "n/a" and provide a short explanation.

Upload your completed checklist as an extra file when you submit to a journal.

In your methods section, say that you used the STROBE cohort reporting guidelines, and cite them as:

von Elm E, Altman DG, Egger M, Pocock SJ, Gøtzsche PC, Vandenbroucke JP. The Strengthening the Reporting of Observational Studies in Epidemiology (STROBE) Statement: guidelines for reporting observational studies.

|                        |     | Reporting Item                                                                                                                  | Page Number |
|------------------------|-----|---------------------------------------------------------------------------------------------------------------------------------|-------------|
| Title                  | #1a | Indicate the study's design with a commonly used term in the title or the abstract                                              | 1           |
| Abstract               | #1b | Provide in the abstract an informative and balanced summary of what was done and what was found                                 | 2           |
| Background / rationale | #2  | Explain the scientific background and rationale for the investigation being reported                                            | 4, 5        |
| Objectives             | #3  | State specific objectives, including any prespecified hypotheses                                                                | 5           |
| Study design           | #4  | Present key elements of study design early in the paper                                                                         | 5, 6        |
| Setting                | #5  | Describe the setting, locations, and relevant dates, including periods of recruitment, exposure, follow-up, and data collection | 6           |
| Eligibility criteria   | #6a | Give the eligibility criteria, and the sources and methods of selection of participants. Describe methods of follow-up.         | 5           |

|    |                  |      |                                                                   |          |
|----|------------------|------|-------------------------------------------------------------------|----------|
| 1  |                  | #6b  | For matched studies, give matching criteria and number of         | na       |
| 2  |                  |      | exposed and unexposed                                             |          |
| 3  |                  |      |                                                                   |          |
| 4  |                  |      |                                                                   |          |
| 5  | Variables        | #7   | Clearly define all outcomes, exposures, predictors, potential     | 6        |
| 6  |                  |      | confounders, and effect modifiers. Give diagnostic criteria, if   |          |
| 7  |                  |      | applicable                                                        |          |
| 8  |                  |      |                                                                   |          |
| 9  |                  |      |                                                                   |          |
| 10 | Data sources /   | #8   | For each variable of interest give sources of data and details of | 6        |
| 11 | measurement      |      | methods of assessment (measurement). Describe                     |          |
| 12 |                  |      | comparability of assessment methods if there is more than one     |          |
| 13 |                  |      | group. Give information separately for for exposed and            |          |
| 14 |                  |      | unexposed groups if applicable.                                   |          |
| 15 |                  |      |                                                                   |          |
| 16 |                  |      |                                                                   |          |
| 17 |                  |      |                                                                   |          |
| 18 | Bias             | #9   | Describe any efforts to address potential sources of bias         | 5, 6, 7  |
| 19 |                  |      |                                                                   |          |
| 20 |                  |      |                                                                   |          |
| 21 | Study size       | #10  | Explain how the study size was arrived at                         | 5        |
| 22 |                  |      |                                                                   |          |
| 23 | Quantitative     | #11  | Explain how quantitative variables were handled in the            | 5, 7     |
| 24 | variables        |      | analyses. If applicable, describe which groupings were chosen,    |          |
| 25 |                  |      | and why                                                           |          |
| 26 |                  |      |                                                                   |          |
| 27 |                  |      |                                                                   |          |
| 28 | Statistical      | #12a | Describe all statistical methods, including those used to control | 6, 7     |
| 29 | methods          |      | for confounding                                                   |          |
| 30 |                  |      |                                                                   |          |
| 31 |                  |      |                                                                   |          |
| 32 |                  | #12b | Describe any methods used to examine subgroups and                | 6, 7     |
| 33 |                  |      | interactions                                                      |          |
| 34 |                  |      |                                                                   |          |
| 35 |                  |      |                                                                   |          |
| 36 |                  | #12c | Explain how missing data were addressed                           | 6, 7     |
| 37 |                  |      |                                                                   |          |
| 38 |                  | #12d | If applicable, explain how loss to follow-up was addressed        | 6, 7     |
| 39 |                  |      |                                                                   |          |
| 40 |                  |      |                                                                   |          |
| 41 |                  | #12e | Describe any sensitivity analyses                                 | na       |
| 42 |                  |      |                                                                   |          |
| 43 | Participants     | #13a | Report numbers of individuals at each stage of study—eg           | 5        |
| 44 |                  |      | numbers potentially eligible, examined for eligibility, confirmed |          |
| 45 |                  |      | eligible, included in the study, completing follow-up, and        |          |
| 46 |                  |      | analysed. Give information separately for for exposed and         |          |
| 47 |                  |      | unexposed groups if applicable.                                   |          |
| 48 |                  |      |                                                                   |          |
| 49 |                  |      |                                                                   |          |
| 50 |                  |      |                                                                   |          |
| 51 |                  | #13b | Give reasons for non-participation at each stage                  | 5        |
| 52 |                  |      |                                                                   |          |
| 53 |                  |      |                                                                   |          |
| 54 |                  | #13c | Consider use of a flow diagram                                    | figure 1 |
| 55 |                  |      |                                                                   |          |
| 56 | Descriptive data | #14a | Give characteristics of study participants (eg demographic,       | 7, table |
| 57 |                  |      | clinical, social) and information on exposures and potential      | 1        |
| 58 |                  |      |                                                                   |          |
| 59 |                  |      |                                                                   |          |
| 60 |                  |      |                                                                   |          |

|    |                  |                                                                        |          |
|----|------------------|------------------------------------------------------------------------|----------|
| 1  |                  | confounders. Give information separately for exposed and               |          |
| 2  |                  | unexposed groups if applicable.                                        |          |
| 3  |                  |                                                                        |          |
| 4  |                  | #14b Indicate number of participants with missing data for each        | Figure 2 |
| 5  |                  | variable of interest                                                   |          |
| 6  |                  |                                                                        |          |
| 7  |                  | #14c Summarise follow-up time (eg, average and total amount)           | 6, 8, 9  |
| 8  |                  |                                                                        |          |
| 9  |                  |                                                                        |          |
| 10 | Outcome data     | #15 Report numbers of outcome events or summary measures               | 7, 8, 9  |
| 11 |                  | over time. Give information separately for exposed and                 |          |
| 12 |                  | unexposed groups if applicable.                                        |          |
| 13 |                  |                                                                        |          |
| 14 |                  |                                                                        |          |
| 15 | Main results     | #16a Give unadjusted estimates and, if applicable, confounder-         | 7, 8, 9  |
| 16 |                  | adjusted estimates and their precision (eg, 95% confidence             |          |
| 17 |                  | interval). Make clear which confounders were adjusted for and          |          |
| 18 |                  | why they were included                                                 |          |
| 19 |                  |                                                                        |          |
| 20 |                  |                                                                        |          |
| 21 |                  |                                                                        |          |
| 22 |                  | #16b Report category boundaries when continuous variables were         | 7, 8, 9  |
| 23 |                  | categorized                                                            |          |
| 24 |                  |                                                                        |          |
| 25 |                  |                                                                        |          |
| 26 |                  | #16c If relevant, consider translating estimates of relative risk into | na       |
| 27 |                  | absolute risk for a meaningful time period                             |          |
| 28 |                  |                                                                        |          |
| 29 |                  |                                                                        |          |
| 30 | Other analyses   | #17 Report other analyses done—e.g., analyses of subgroups and         | na       |
| 31 |                  | interactions, and sensitivity analyses                                 |          |
| 32 |                  |                                                                        |          |
| 33 |                  |                                                                        |          |
| 34 | Key results      | #18 Summarise key results with reference to study objectives           | 9, 10    |
| 35 |                  |                                                                        |          |
| 36 | Limitations      | #19 Discuss limitations of the study, taking into account sources of   | 11, 12   |
| 37 |                  | potential bias or imprecision. Discuss both direction and              |          |
| 38 |                  | magnitude of any potential bias.                                       |          |
| 39 |                  |                                                                        |          |
| 40 |                  |                                                                        |          |
| 41 | Interpretation   | #20 Give a cautious overall interpretation considering objectives,     | See note |
| 42 |                  | limitations, multiplicity of analyses, results from similar studies,   | 1        |
| 43 |                  | and other relevant evidence.                                           |          |
| 44 |                  |                                                                        |          |
| 45 |                  |                                                                        |          |
| 46 | Generalisability | #21 Discuss the generalisability (external validity) of the study      | See note |
| 47 |                  | results                                                                | 2        |
| 48 |                  |                                                                        |          |
| 49 |                  |                                                                        |          |
| 50 | Funding          | #22 Give the source of funding and the role of the funders for the     | 3        |
| 51 |                  | present study and, if applicable, for the original study on which      |          |
| 52 |                  | the present article is based                                           |          |
| 53 |                  |                                                                        |          |
| 54 |                  |                                                                        |          |
| 55 |                  |                                                                        |          |

## Author notes

1. 10, 11, 12, 13

1 2. 10, 11, 12, 13

2 The STROBE checklist is distributed under the terms of the Creative Commons Attribution License  
3 CC-BY. This checklist was completed on 18. May 2018 using <http://www.goodreports.org/>, a tool  
4 made by the [EQUATOR Network](#) in collaboration with [Penelope.ai](#)  
5  
6  
7  
8  
9  
10  
11  
12  
13  
14  
15  
16  
17  
18  
19  
20  
21  
22  
23  
24  
25  
26  
27  
28  
29  
30  
31  
32  
33  
34  
35  
36  
37  
38  
39  
40  
41  
42  
43  
44  
45  
46  
47  
48  
49  
50  
51  
52  
53  
54  
55  
56  
57  
58  
59  
60

For peer review only
