# Supplementary material for: Association between parity and persistent weight gain at age 40–60 years: a longitudinal prospective cohort study
Source: PubMed Central journal article supplement — BMJ Open. 2019 May 5;9(5):e024279. doi: 10.1136/bmjopen-2018-024279 (PMC6501996; doi:10.1136/bmjopen-2018-024279), 2019-05-05
Supplement: bmjopen-2018-024279supp001.pdf [file bmjopen-2018-024279supp001.pdf]

**Supplemental table 1: stepwise correction for GEE-analysis**

**Table 1A:** Correction models for GEE-analysis, stratified at age 40 – 50 years

|                 | Unadjusted         |                   |                          | Adjusted for age   |                   |                          | Adjusted for age & education |                   |                          | Adjusted for age & OCC |                   |                          | Adjusted for age & education & OCC |                   |                          |
|-----------------|--------------------|-------------------|--------------------------|--------------------|-------------------|--------------------------|------------------------------|-------------------|--------------------------|------------------------|-------------------|--------------------------|------------------------------------|-------------------|--------------------------|
|                 | P <sub>group</sub> | P <sub>time</sub> | P <sub>interaction</sub> | P <sub>group</sub> | P <sub>time</sub> | P <sub>interaction</sub> | P <sub>group</sub>           | P <sub>time</sub> | P <sub>interaction</sub> | P <sub>group</sub>     | P <sub>time</sub> | P <sub>interaction</sub> | P <sub>group</sub>                 | P <sub>time</sub> | P <sub>interaction</sub> |
| BMI             | 0.003              | <0.001            | 0.667                    | 0.011              | 0.938             | 0.694                    | 0.323                        | 0.552             | 0.685                    | 0.010                  | 0.910             | 0.627                    | 0.342                              | 0.64              | 0.628                    |
| HDL-cholesterol | 0.008              | <0.001            | 0.530                    | 0.003              | 0.737             | 0.520                    | 0.047                        | 0.472             | 0.519                    | 0.006                  | 0.666             | 0.570                    | 0.080                              | 0.438             | 0.565                    |
| MAP             | 0.558              | 0.005             | 0.815                    | 0.866              | <0.001            | 0.779                    | 0.871                        | <0.001            | 0.777                    | 0.874                  | <0.001            | 0.875                    | 0.904                              | <0.001            | 0.871                    |

Abbreviation: OCC, oral contraceptives

**Table 1B:** Correction models for GEE-analysis, stratified at age 50 – 60 years

|                 | Unadjusted         |                   |                          | Adjusted for age   |                   |                          | Adjusted for age & education |                   |                          | Adjusted for age & OCC |                   |                          | Adjusted for age & education & OCC |                   |                          |
|-----------------|--------------------|-------------------|--------------------------|--------------------|-------------------|--------------------------|------------------------------|-------------------|--------------------------|------------------------|-------------------|--------------------------|------------------------------------|-------------------|--------------------------|
|                 | P <sub>group</sub> | P <sub>time</sub> | P <sub>interaction</sub> | P <sub>group</sub> | P <sub>time</sub> | P <sub>interaction</sub> | P <sub>group</sub>           | P <sub>time</sub> | P <sub>interaction</sub> | P <sub>group</sub>     | P <sub>time</sub> | P <sub>interaction</sub> | P <sub>group</sub>                 | P <sub>time</sub> | P <sub>interaction</sub> |
| BMI             | 0.004              | <0.001            | 0.947                    | 0.006              | 0.197             | 0.945                    | 0.009                        | 0.031             | 0.920                    | 0.011                  | 0.269             | 0.849                    | 0.017                              | 0.048             | 0.812                    |
| HDL-cholesterol | 0.027              | 0.007             | 0.184                    | 0.031              | 0.040             | 0.171                    | 0.051                        | 0.152             | 0.151                    | 0.085                  | 0.035             | 0.055                    | 0.118                              | 0.126             | 0.045                    |
| MAP             | 0.328              | 0.023             | 0.494                    | 0.411              | <0.001            | 0.478                    | 0.522                        | 0.005             | 0.457                    | 0.637                  | 0.003             | 0.802                    | 0.669                              | 0.025             | 0.786                    |

Abbreviation: OCC, oral contraceptives

**Table 1C:** Correction models for GEE-analysis, stratified at age > 60 years

|                 | Unadjusted         |                   |                          | Adjusted for age   |                   |                          | Adjusted for age & education |                   |                          | Adjusted for age & OCC |                   |                          | Adjusted for age & education & OCC |                   |                          |
|-----------------|--------------------|-------------------|--------------------------|--------------------|-------------------|--------------------------|------------------------------|-------------------|--------------------------|------------------------|-------------------|--------------------------|------------------------------------|-------------------|--------------------------|
|                 | P <sub>group</sub> | P <sub>time</sub> | P <sub>interaction</sub> | P <sub>group</sub> | P <sub>time</sub> | P <sub>interaction</sub> | P <sub>group</sub>           | P <sub>time</sub> | P <sub>interaction</sub> | P <sub>group</sub>     | P <sub>time</sub> | P <sub>interaction</sub> | P <sub>group</sub>                 | P <sub>time</sub> | P <sub>interaction</sub> |
| BMI             | 0.001              | <0.001            | 0.662                    | 0.001              | 0.116             | 0.662                    | 0.006                        | 0.087             | 0.663                    | 0.002                  | 0.011             | 0.625                    | 0.006                              | 0.009             | 0.626                    |
| HDL-cholesterol | 0.156              | 0.001             | 0.163                    | 0.155              | 0.114             | 0.191                    | 0.314                        | 0.142             | 0.201                    | 0.162                  | 0.102             | 0.358                    | 0.299                              | 0.132             | 0.384                    |
| MAP             | 0.415              | <0.001            | 0.348                    | 0.646              | <0.001            | 0.407                    | 0.649                        | <0.001            | 0.407                    | 0.667                  | <0.001            | 0.508                    | 0.678                              | <0.001            | 0.507                    |

Abbreviation: OCC, oral contraceptives
